# Supplementary material
Source: PubMed Central journal article supplement (PMC3903665)

Supporting Information For:

## Molecular Library Synthesis Using Complex Substrates: Expanding the Framework of Triterpenoids

Vasily A. Ignatenko, Yong Han, and Gregory P. Tochtrop\*

Department of Chemistry, Case Western Reserve University, 10900 Euclid Avenue, Cleveland, Ohio 44106, United States

\*E-mail: [tochtrop@case.edu](mailto:tochtrop@case.edu)

### Table of Contents

|                                                                                                 |         |
|-------------------------------------------------------------------------------------------------|---------|
| General experimental details.....                                                               | S02     |
| Complete reference 46 .....                                                                     | S02     |
| <b>Figure S1.</b> Mechanistic considerations for the formation of <b>10</b> and <b>11</b> ..... | S03     |
| <b>Figure S2.</b> Conformational analyses of polyketones <b>4</b> , <b>6</b> , <b>16</b> .....  | S03     |
| <b>Figure S3.</b> Key COSY, HMBC and NOESY correlations of <b>8</b> .....                       | S04     |
| <b>Figure S4.</b> Key COSY, HMBC and NOESY correlations of <b>9</b> .....                       | S05     |
| <b>Figure S5.</b> Key COSY, HMBC and NOESY correlations of <b>10</b> .....                      | S06     |
| <b>Figure S6.</b> Key COSY, HMBC and NOESY correlations of <b>12</b> .....                      | S07     |
| <b>Figure S7.</b> Key COSY, HMBC and NOESY correlations of <b>13</b> .....                      | S08     |
| <b>Figure S8.</b> Key COSY, HMBC and NOESY correlations of <b>15</b> .....                      | S09     |
| <b>Figure S9.</b> Key COSY, HMBC and NOESY correlations of <b>19</b> .....                      | S10     |
| <b>Figure S10.</b> Key COSY, HMBC and NOESY correlations of <b>20</b> .....                     | S11     |
| <b>Figure S11.</b> Key HMBC correlations of <b>6</b> .....                                      | S12     |
| <b>Figure S12.</b> Key HMBC correlations of <b>14</b> .....                                     | S12     |
| <b>Figure S13.</b> Key COSY and HMBC correlations of <b>17</b> .....                            | S12     |
| <b>Figures S14-S49.</b> NMR spectra of <b>2 – 20</b> .....                                      | S13-S48 |

## General experimental details

All reactions were run in an atmosphere of dry argon unless otherwise stated. THF was distilled from benzophenone ketyl solution with sodium prior to use. Quick syringe transfers were done with disposable syringes and needles.

Column chromatography was performed with silica gel (particle size 32-63  $\mu\text{m}$ ). Analytical and semi-preparative HPLC separations were performed using acetonitrile and water (for HPLC, 99.9%). Analytical thin-layer chromatography (TLC) was carried out using glass-coated silica gel 0.25 mm plates with fluorescent indicator. All reactions that were monitored by TLC were visualized with a 254 nm UV-lamp or using phosphomolybdic acid (PMA) and 1,4-dinitrophenylhydrazine (DNP) stain solutions prepared by well-known protocols.

Chemical shifts of all  $^1\text{H}$  and  $^{13}\text{C}$  NMR spectra reported in  $\delta$  units, part per million (ppm) with reference to the residual solvent peak ( $\text{CDCl}_3$ , 7.26 ppm for  $^1\text{H}$  NMR and 77.16 ppm, center of triplet, for  $^{13}\text{C}$  NMR). DEPT, COSY, NOESY, HMQC, HMBC spectra were recorded using standard 2-D NMR pulse sequences.

## Complete reference 46

Reference 46. Gaussian 09, Revision A.02,  
M. J. Frisch, G. W. Trucks, H. B. Schlegel, G. E. Scuseria,  
M. A. Robb, J. R. Cheeseman, G. Scalmani, V. Barone, B. Mennucci,  
G. A. Petersson, H. Nakatsuji, M. Caricato, X. Li, H. P. Hratchian,  
A. F. Izmaylov, J. Bloino, G. Zheng, J. L. Sonnenberg, M. Hada,  
M. Ehara, K. Toyota, R. Fukuda, J. Hasegawa, M. Ishida, T. Nakajima,  
Y. Honda, O. Kitao, H. Nakai, T. Vreven, J. A. Montgomery, Jr.,  
J. E. Peralta, F. Ogliaro, M. Bearpark, J. J. Heyd, E. Brothers,  
K. N. Kudin, V. N. Staroverov, R. Kobayashi, J. Normand,  
K. Raghavachari, A. Rendell, J. C. Burant, S. S. Iyengar, J. Tomasi,  
M. Cossi, N. Rega, J. M. Millam, M. Klene, J. E. Knox, J. B. Cross,  
V. Bakken, C. Adamo, J. Jaramillo, R. Gomperts, R. E. Stratmann,  
O. Yazyev, A. J. Austin, R. Cammi, C. Pomelli, J. W. Ochterski,  
R. L. Martin, K. Morokuma, V. G. Zakrzewski, G. A. Voth,  
P. Salvador, J. J. Dannenberg, S. Dapprich, A. D. Daniels,  
O. Farkas, J. B. Foresman, J. V. Ortiz, J. Cioslowski,  
and D. J. Fox, Gaussian, Inc., Wallingford CT, 2009.

**Figure S1.** Mechanistic considerations for the formation of **10** and **11**.

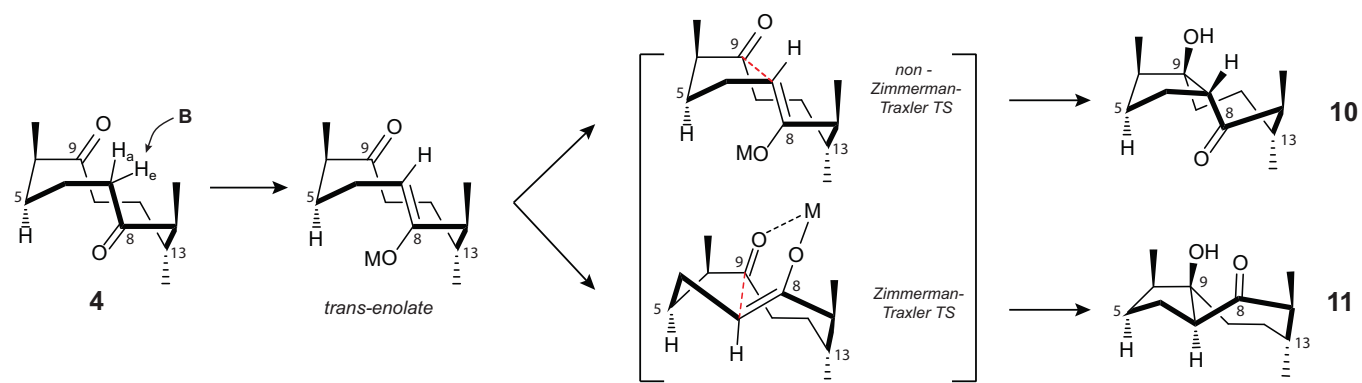

**Figure S2.** Conformational analyses of polyketones **4**, **6**, **16**.

Conformational analyses were carried out using Gaussian (R) 09 using B3LYP/6-311G(d,p).

Ground state conformations and electronic energies are shown.

BCC = 'boat (with bow at C-5 and stern between C-8 and C-11) -chair-chair'

CCB = 'chair-chair- boat (with bow between C-8 and C-11 and stern at C-13)'

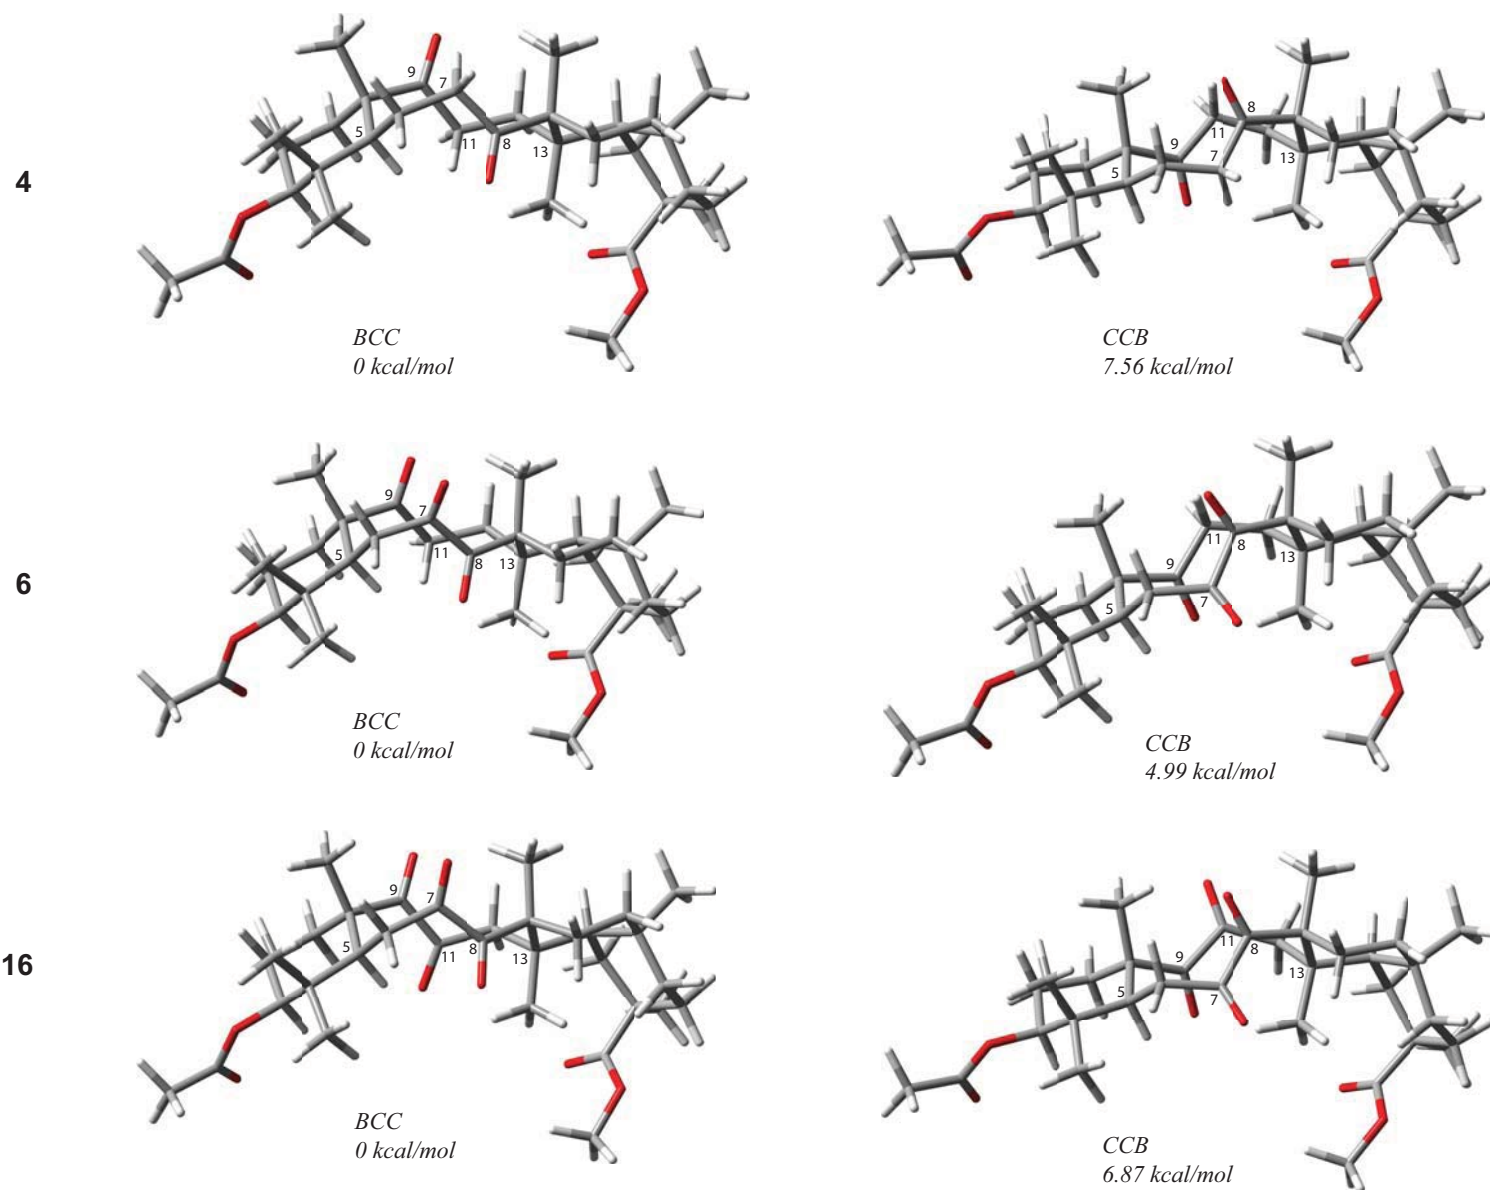

**Figure S3.** Key COSY, HMBC and NOESY correlations of **8**.

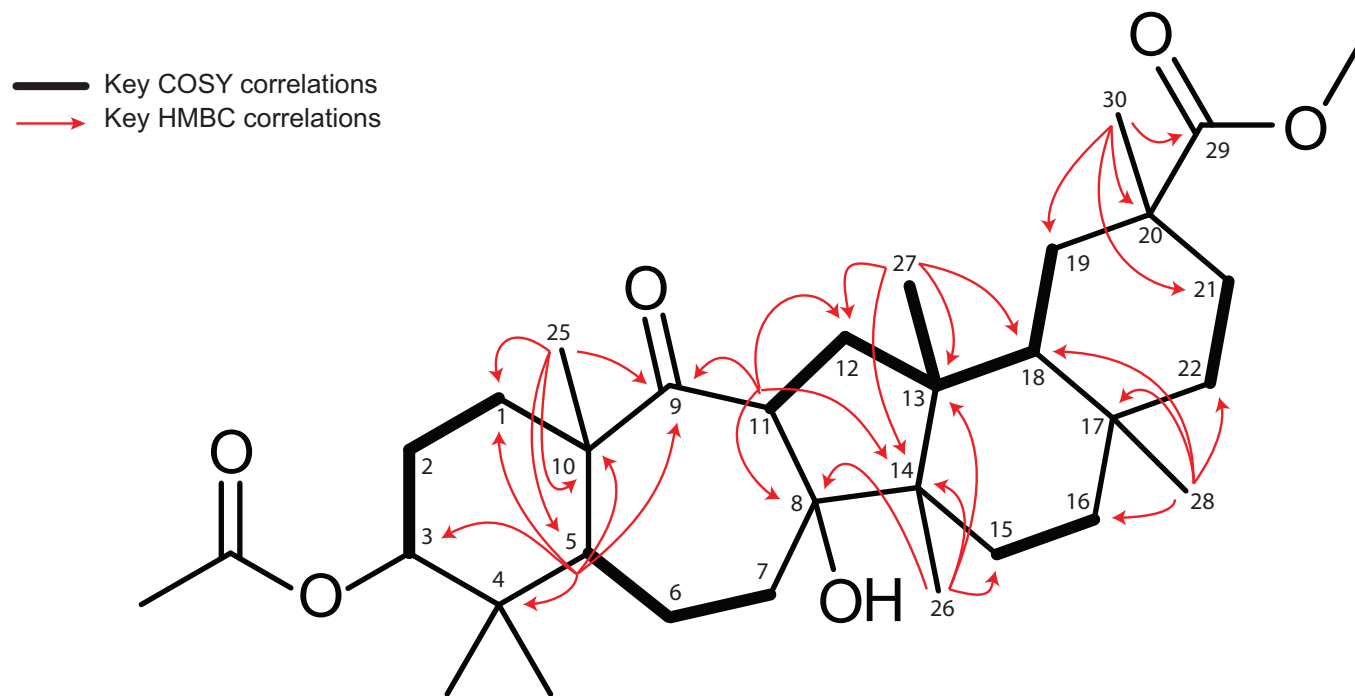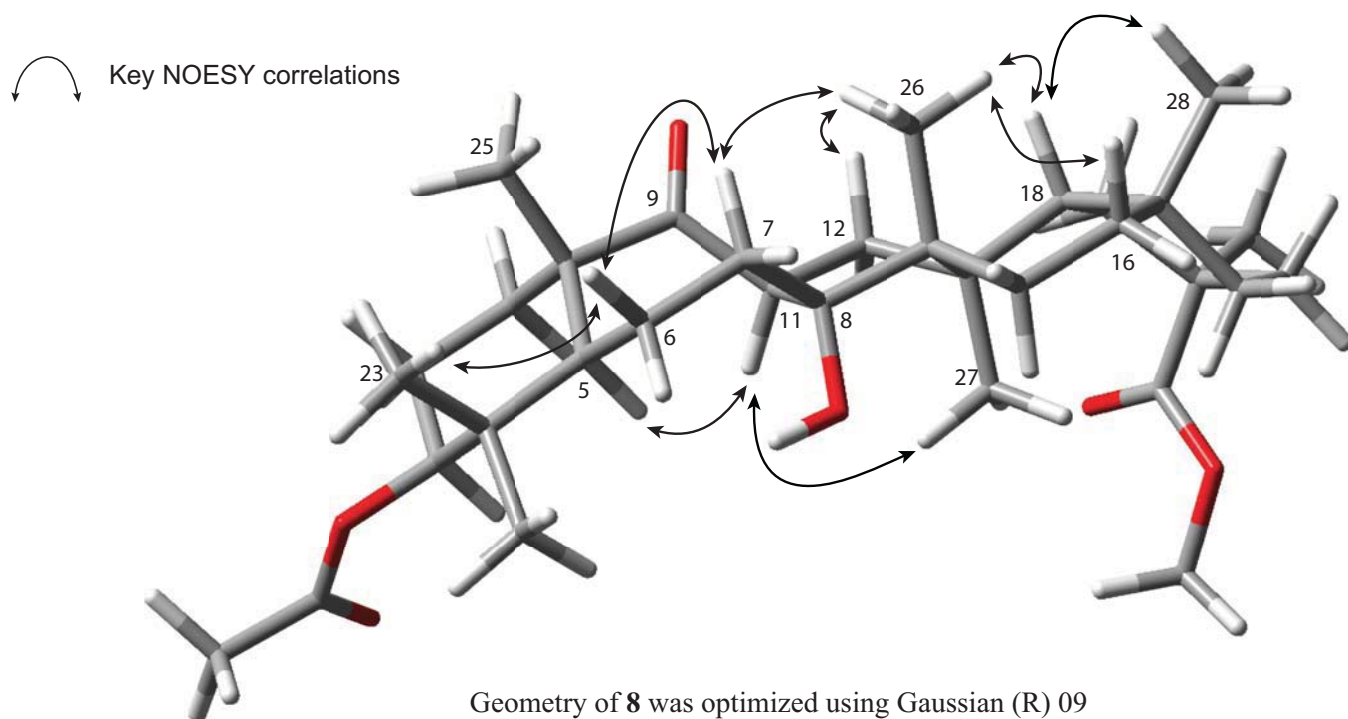

Geometry of **8** was optimized using Gaussian (R) 09 with B3LYP/6-311G(d,p).

**Figure S4.** Key COSY, HMBC and NOESY correlations of **9**.

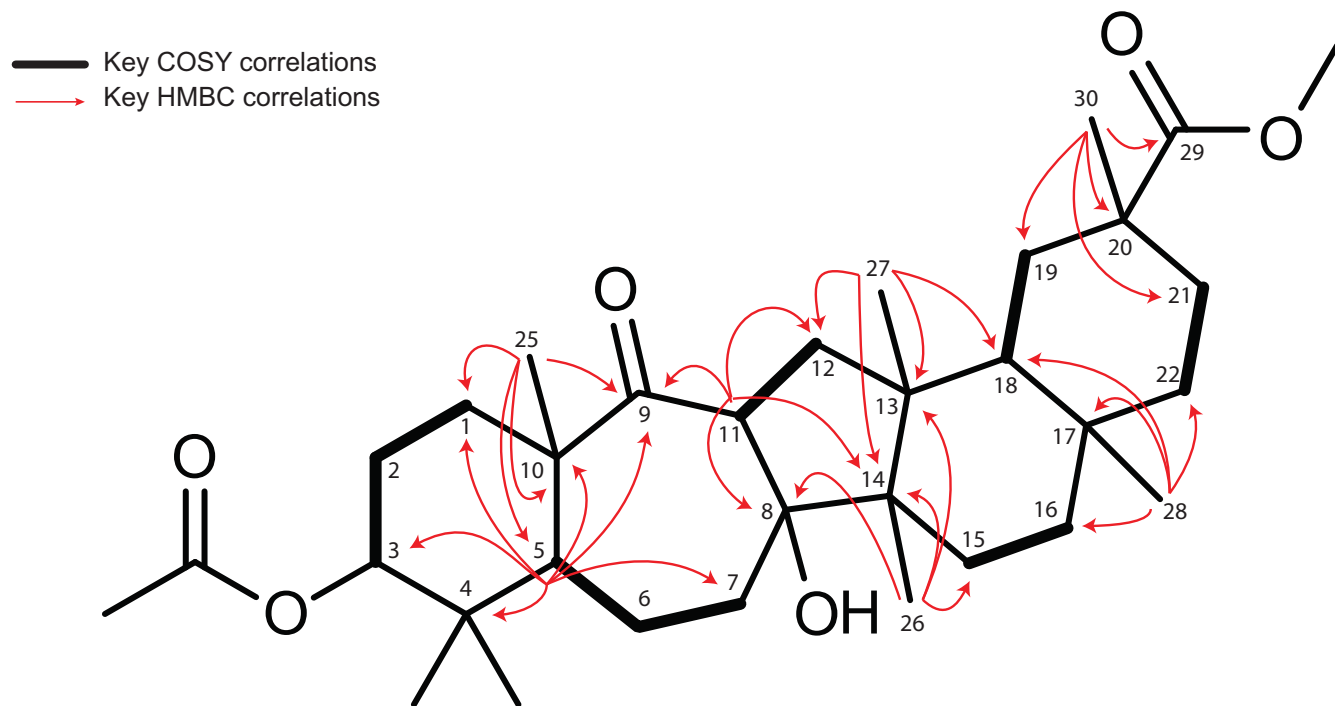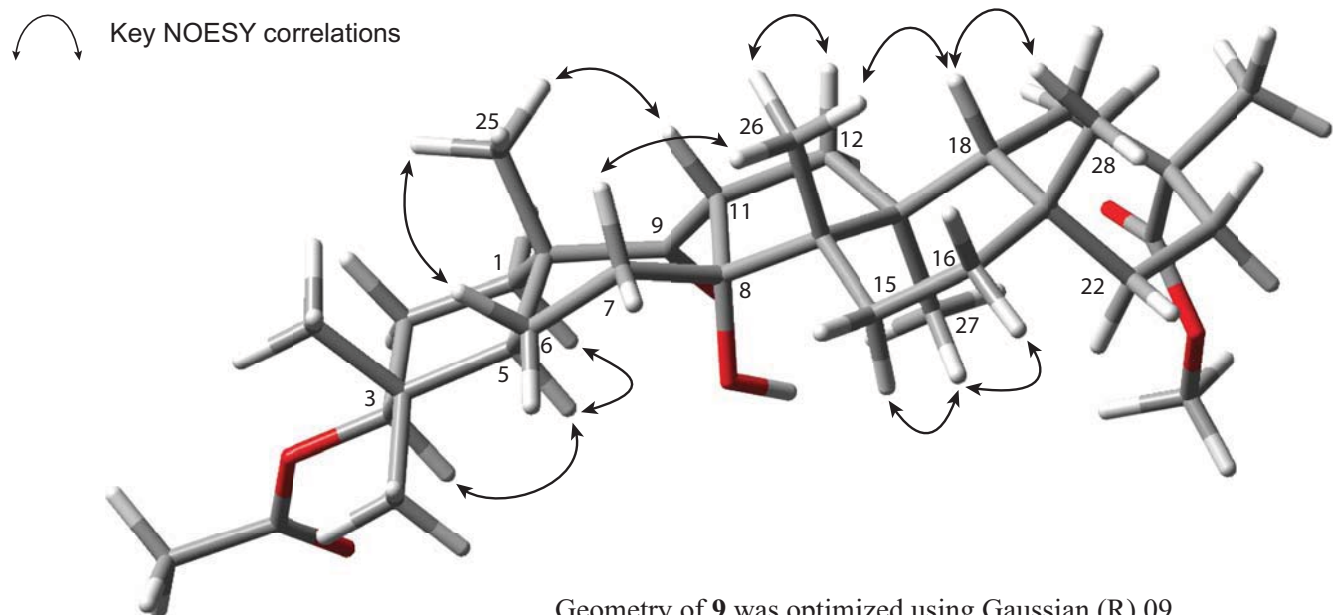

Geometry of **9** was optimized using Gaussian (R) 09 with B3LYP/6-311G(d,p).

Figure S5. Key COSY, HMBC and NOESY correlations of **10**.

— Key COSY correlations  
→ Key HMBC correlations

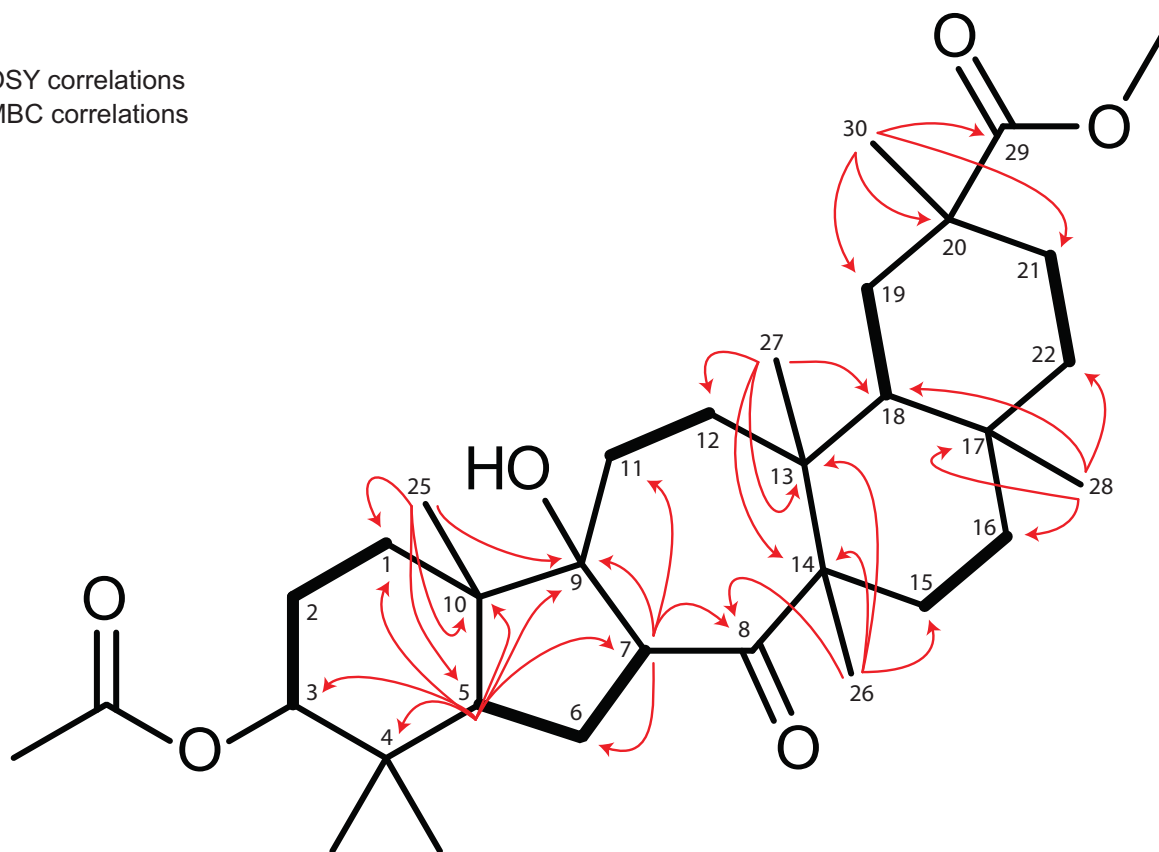

↔ Key NOESY correlations

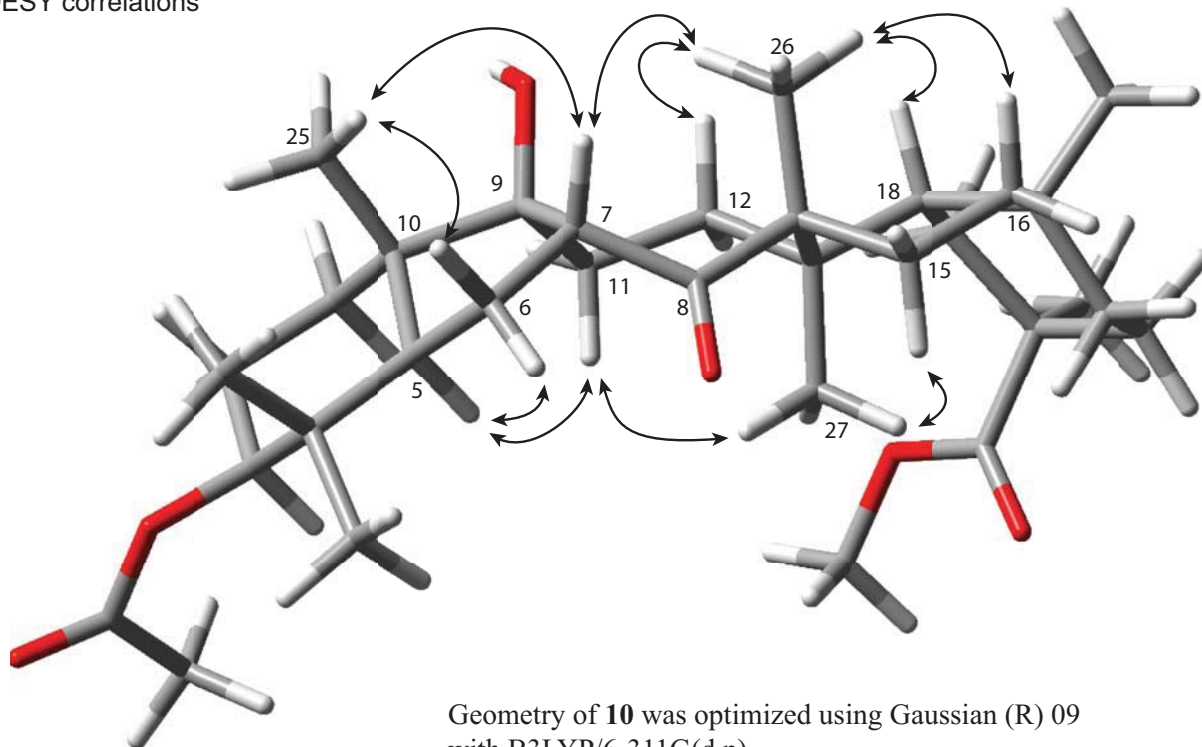

Geometry of **10** was optimized using Gaussian (R) 09 with B3LYP/6-311G(d,p).

**Figure S6.** Key COSY, HMBC and NOESY correlations of **12**.

— Key COSY correlations  
→ Key HMBC correlations

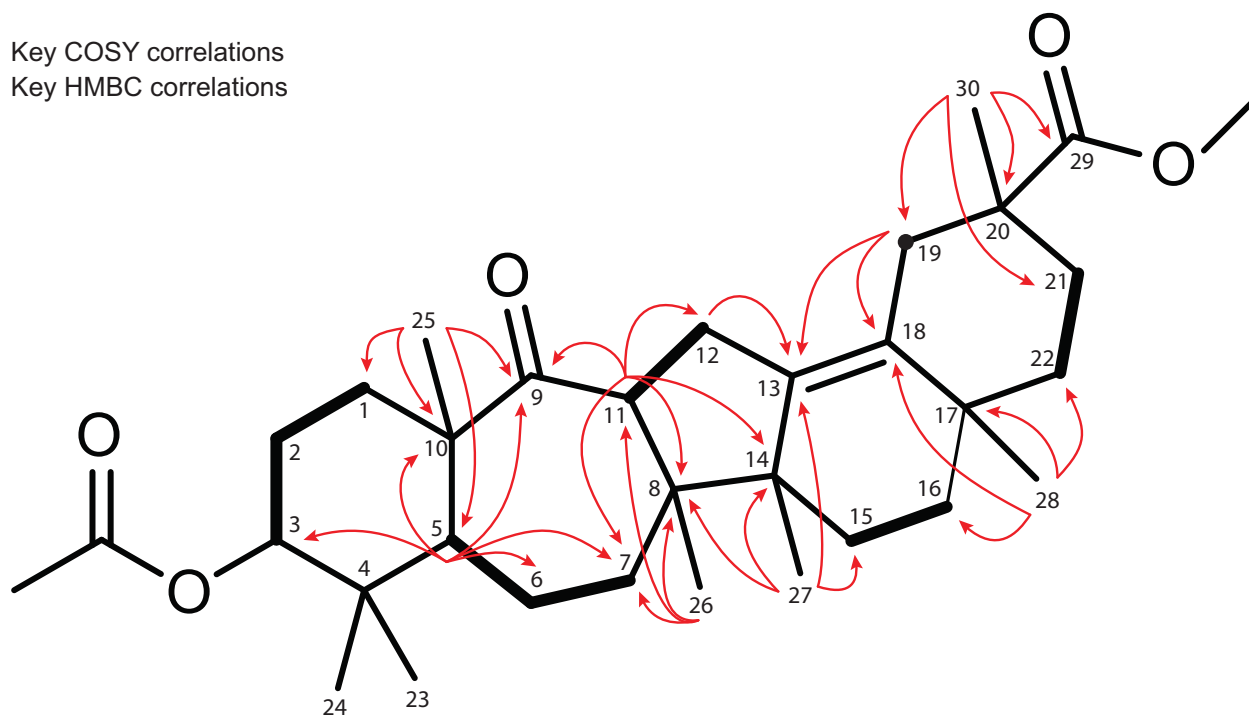

↔ Key NOESY correlations

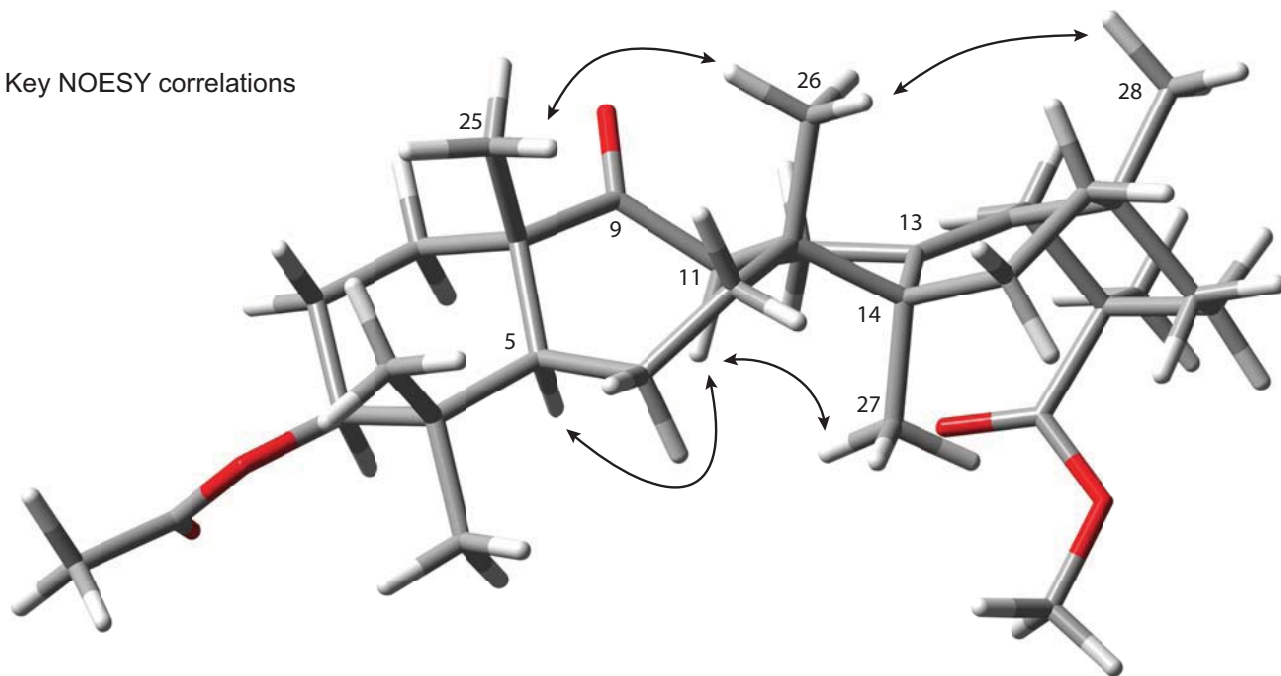

Geometry of **12** was optimized using Gaussian (R) 09 with B3LYP/6-311G(d,p).

**Figure S7.** Key COSY, HMBC and NOESY correlations of **13** .

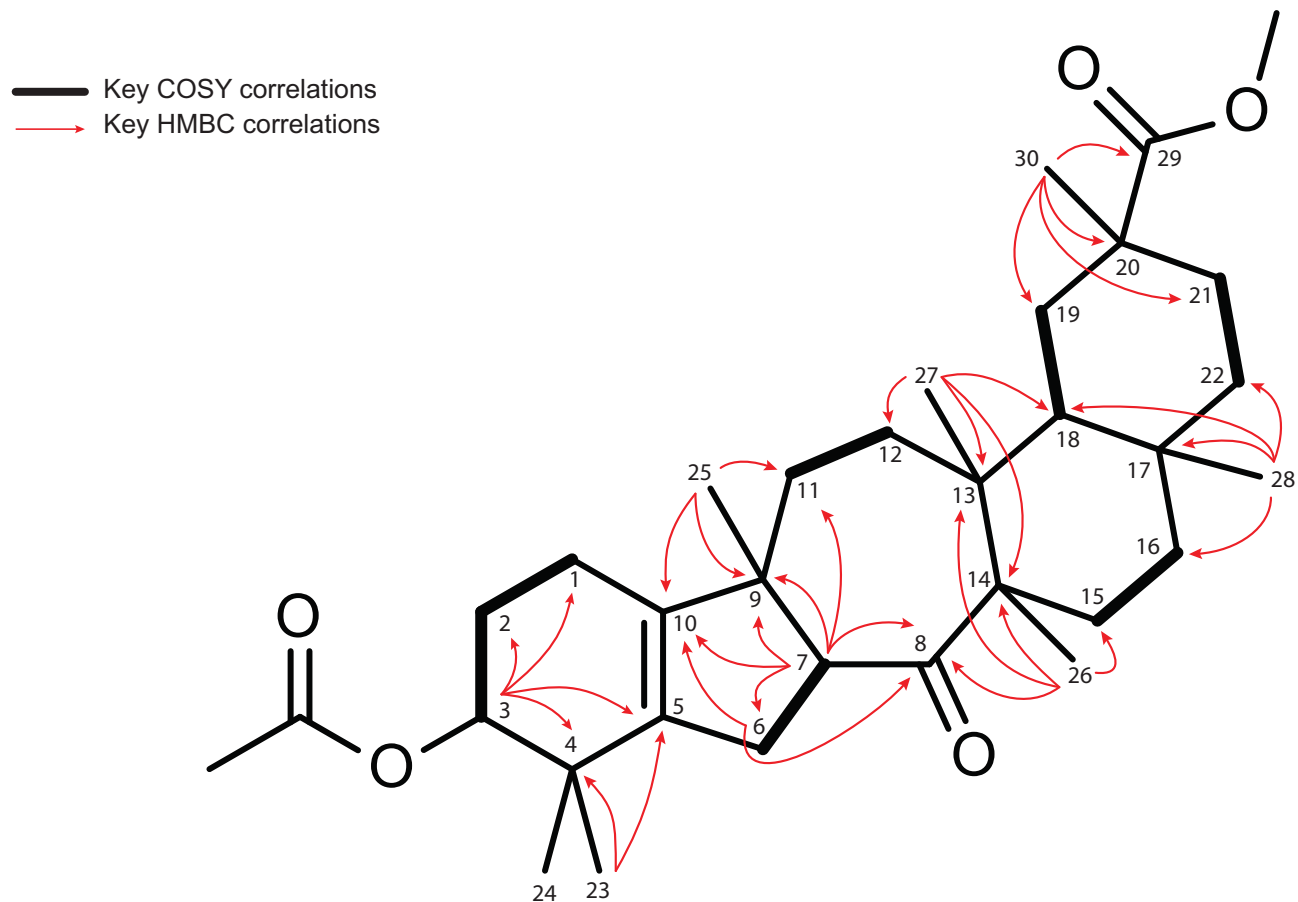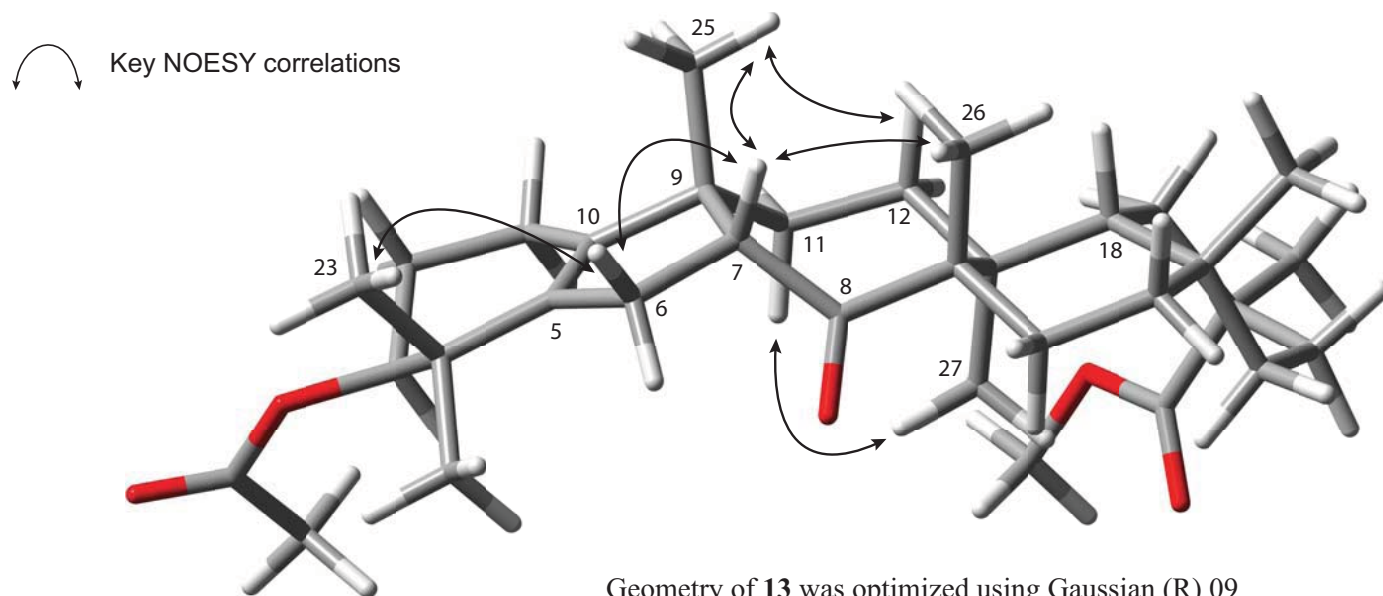

Geometry of **13** was optimized using Gaussian (R) 09 with B3LYP/6-311G(d,p).



Figure S8. Key HMBC and NOESY correlations of **15**.

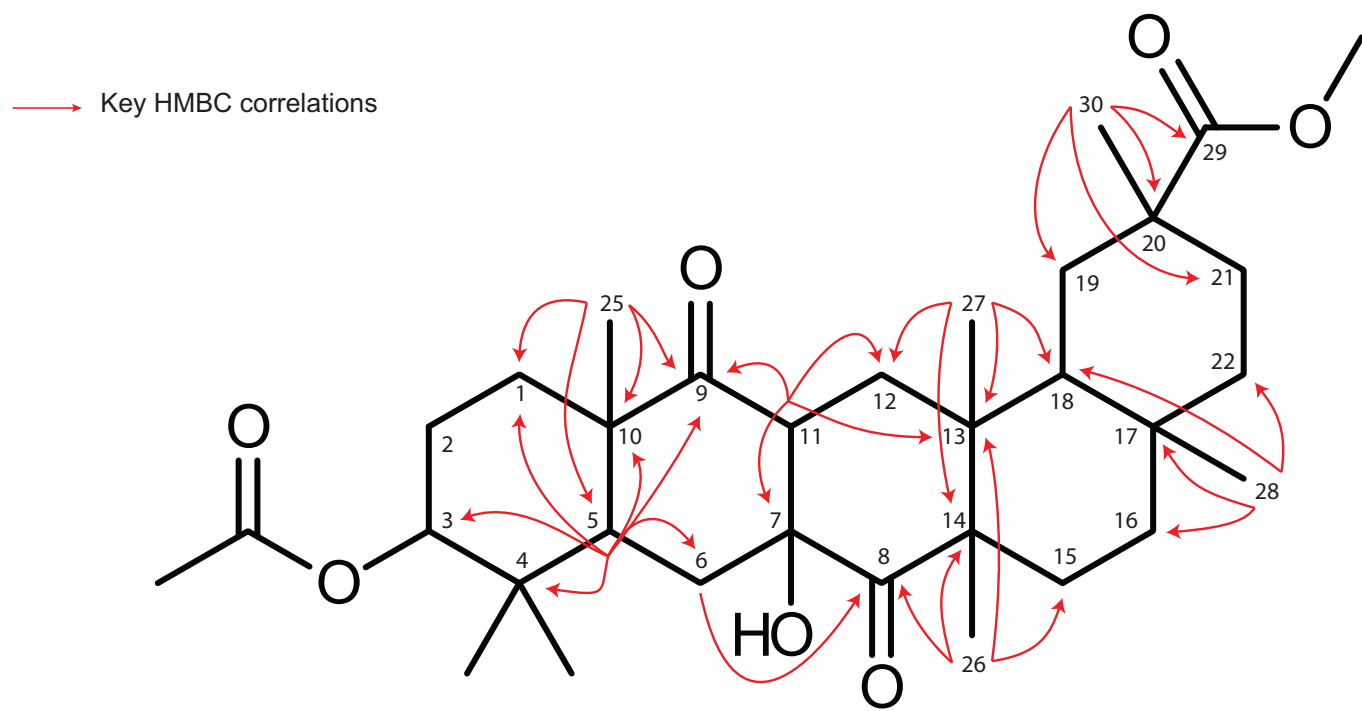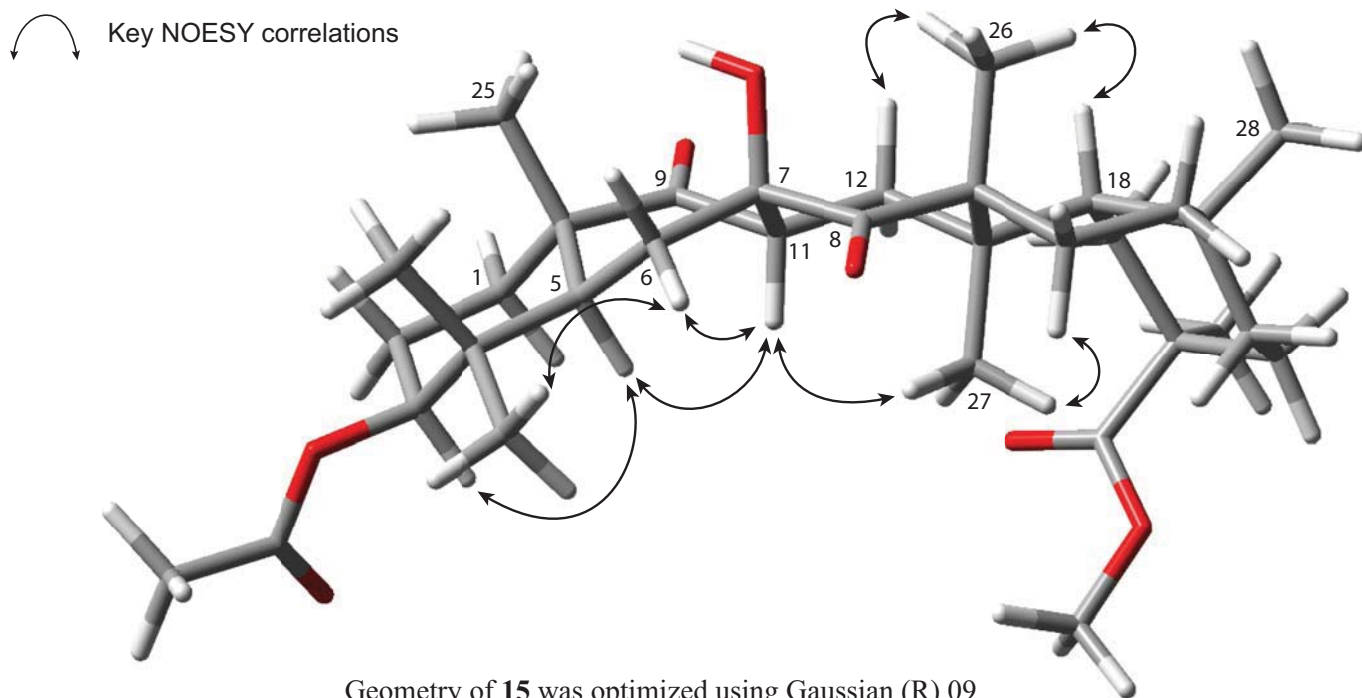

Geometry of **15** was optimized using Gaussian (R) 09 with B3LYP/6-311G(d,p).

**Figure S9.** Key COSY, HMBC and NOESY correlations of **19**.

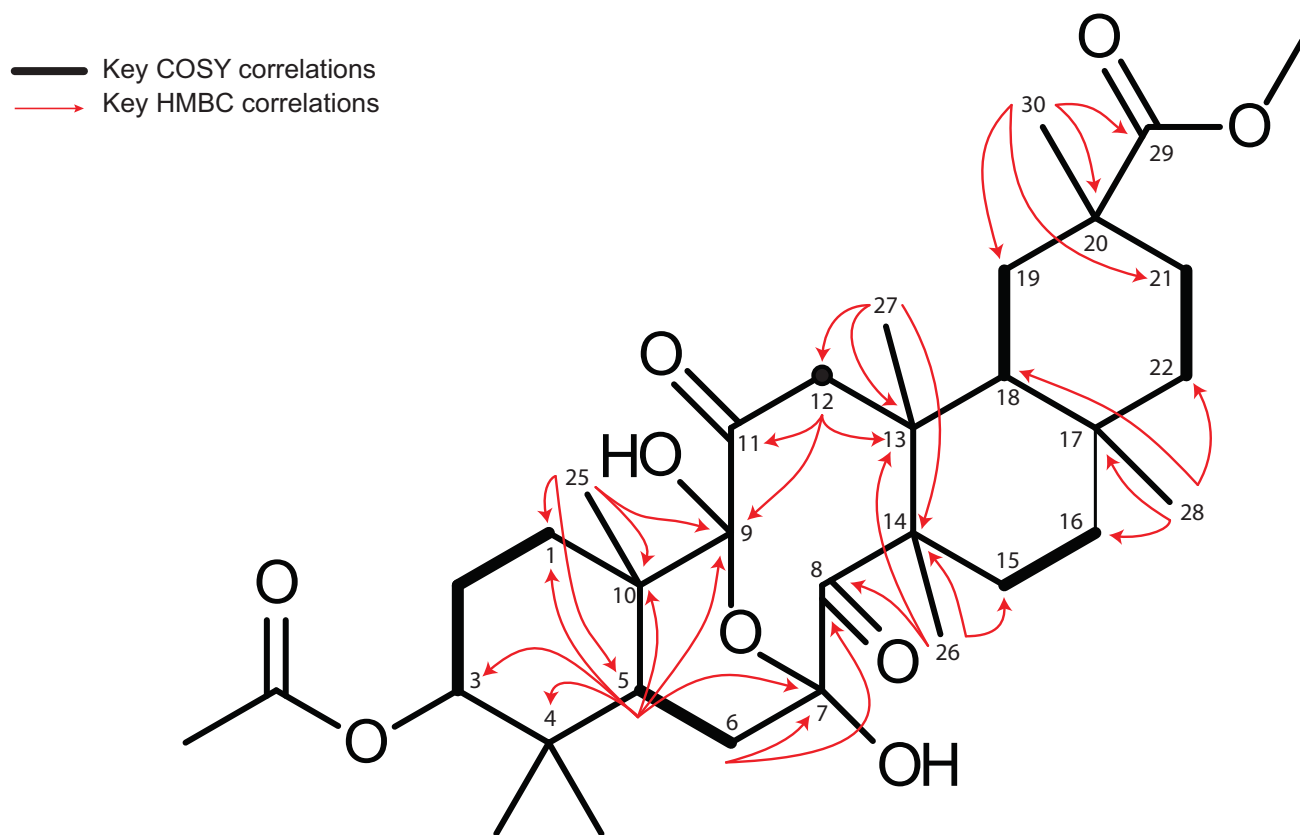

↷ Key NOESY correlations

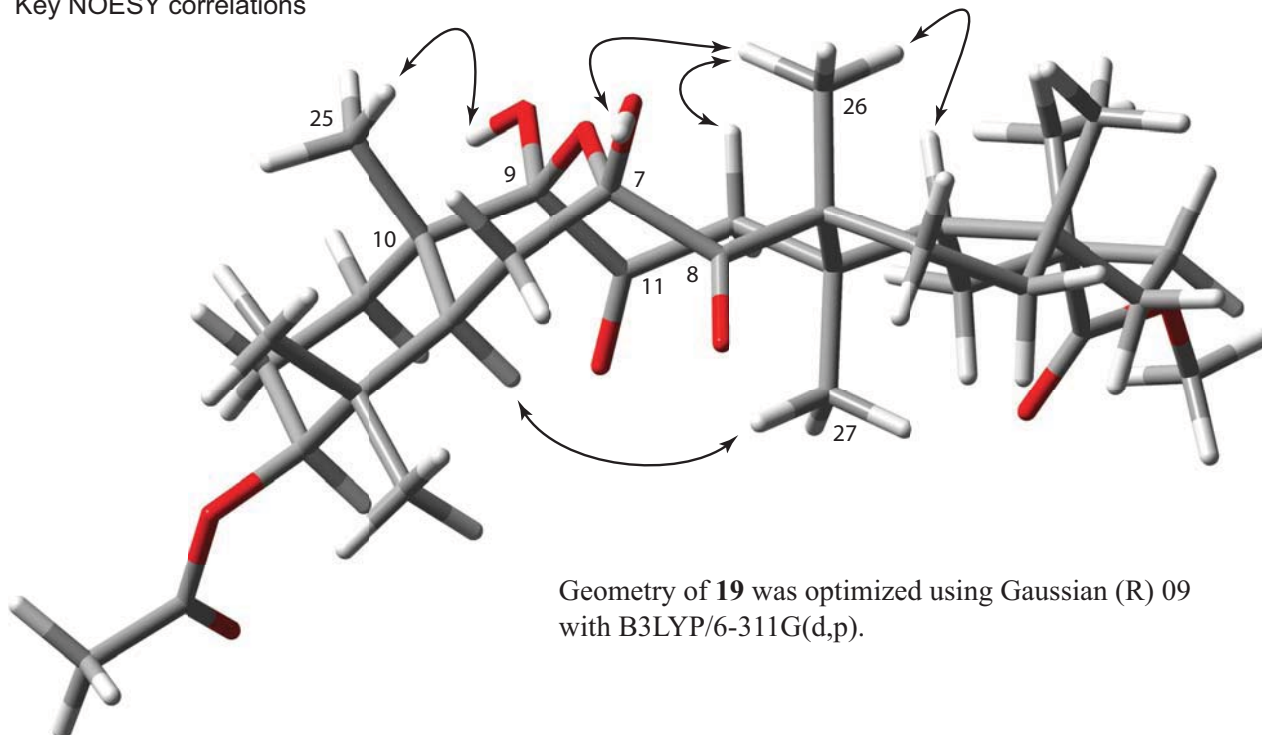

**Figure S10.** Key COSY, HMBC and NOESY correlations of **20**.

— Key COSY correlations  
→ Key HMBC correlations

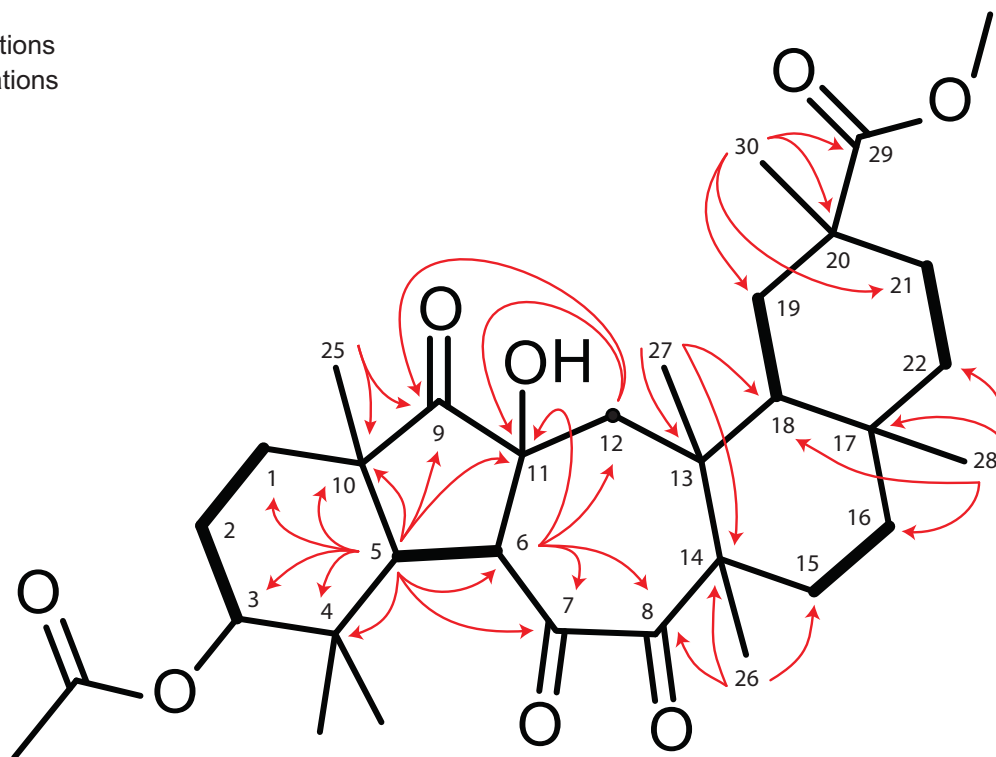

↷ Key NOESY correlations

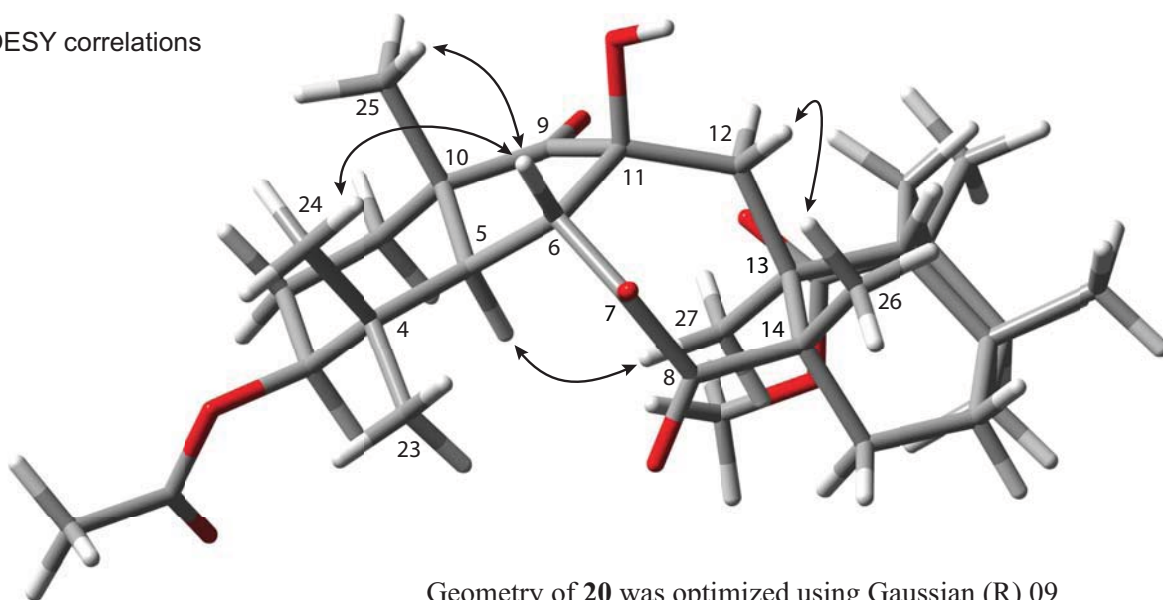

Geometry of **20** was optimized using Gaussian (R) 09 with B3LYP/6-311G(d,p).

Figure S11. Key HMBC correlations of 6 .

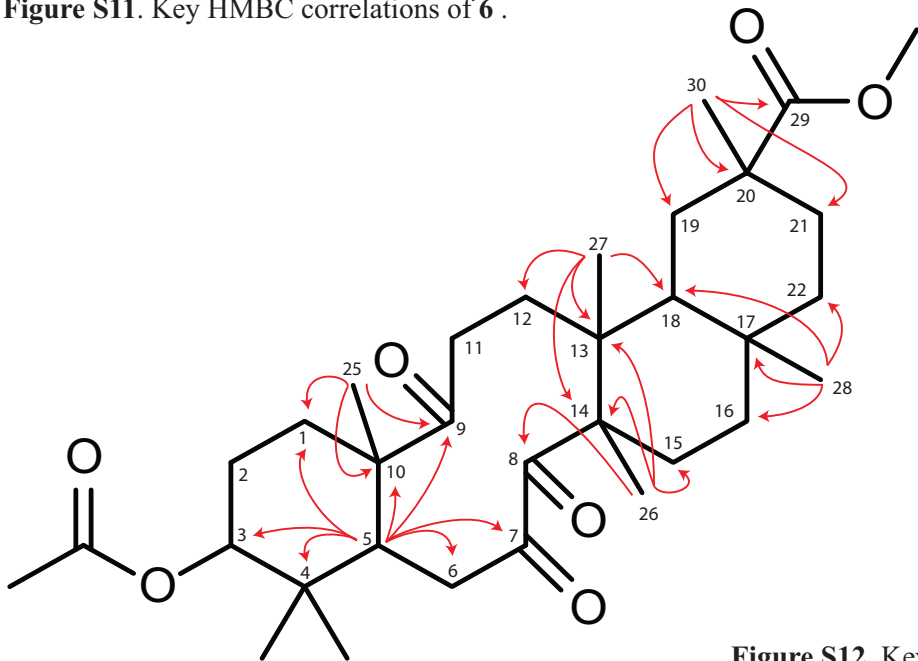

Figure S12. Key HMBC correlations of 14 .

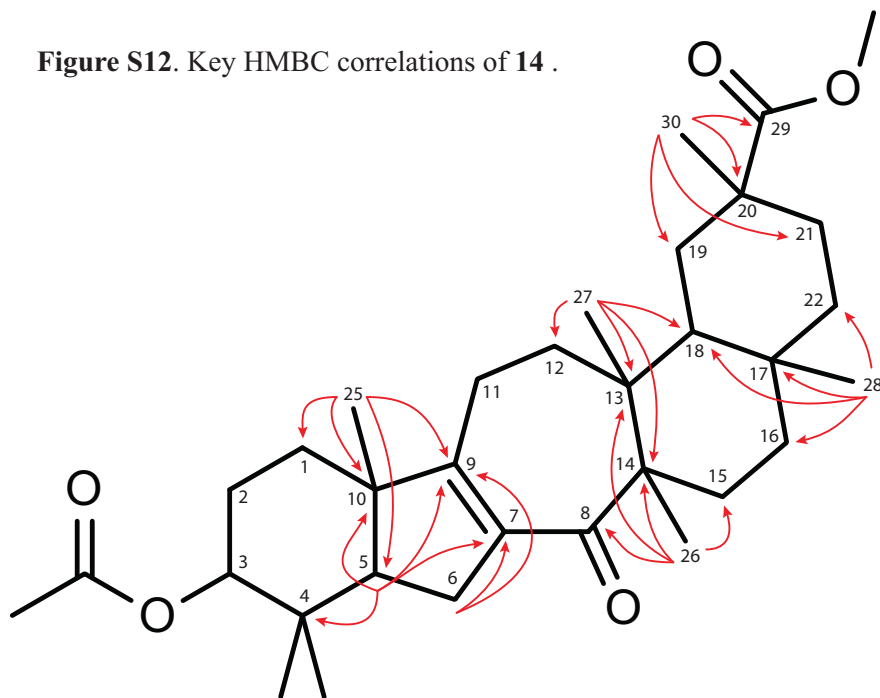

Figure S13. Key COSY and HMBC correlations of 17 .

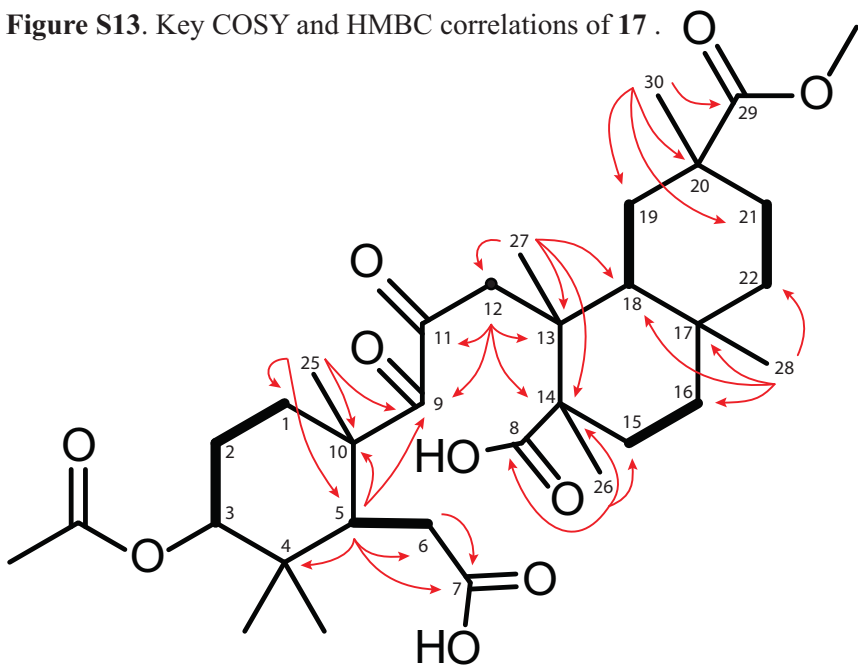

Figure S14. <sup>1</sup>H and <sup>13</sup>C spectra of 2.

vai2\_11Sep2010-15:24:11  
Data saved in:  
chem400:/export/home/vai2/vnmrsys/data

Archive directory: /export/home/vai2/vnmrsys/data  
Sample directory: vai2\_11Sep2010-15:24:11

Pulse Sequence: s2pul

Solvent: CDCl<sub>3</sub>  
Ambient temperature  
File:  
INOVA-500 "joe"

Relax. delay 1.000 sec  
Pulse 45.0 degrees  
Acq. time 3.744 sec  
Width 6395.9 Hz  
8 repetitions  
OBSERVE H1, 399.7434710 MHz  
DATA PROCESSING  
FT size 65536  
Total time 0 min, 38 sec

<sup>1</sup>H

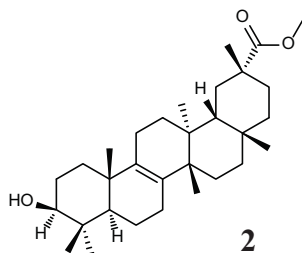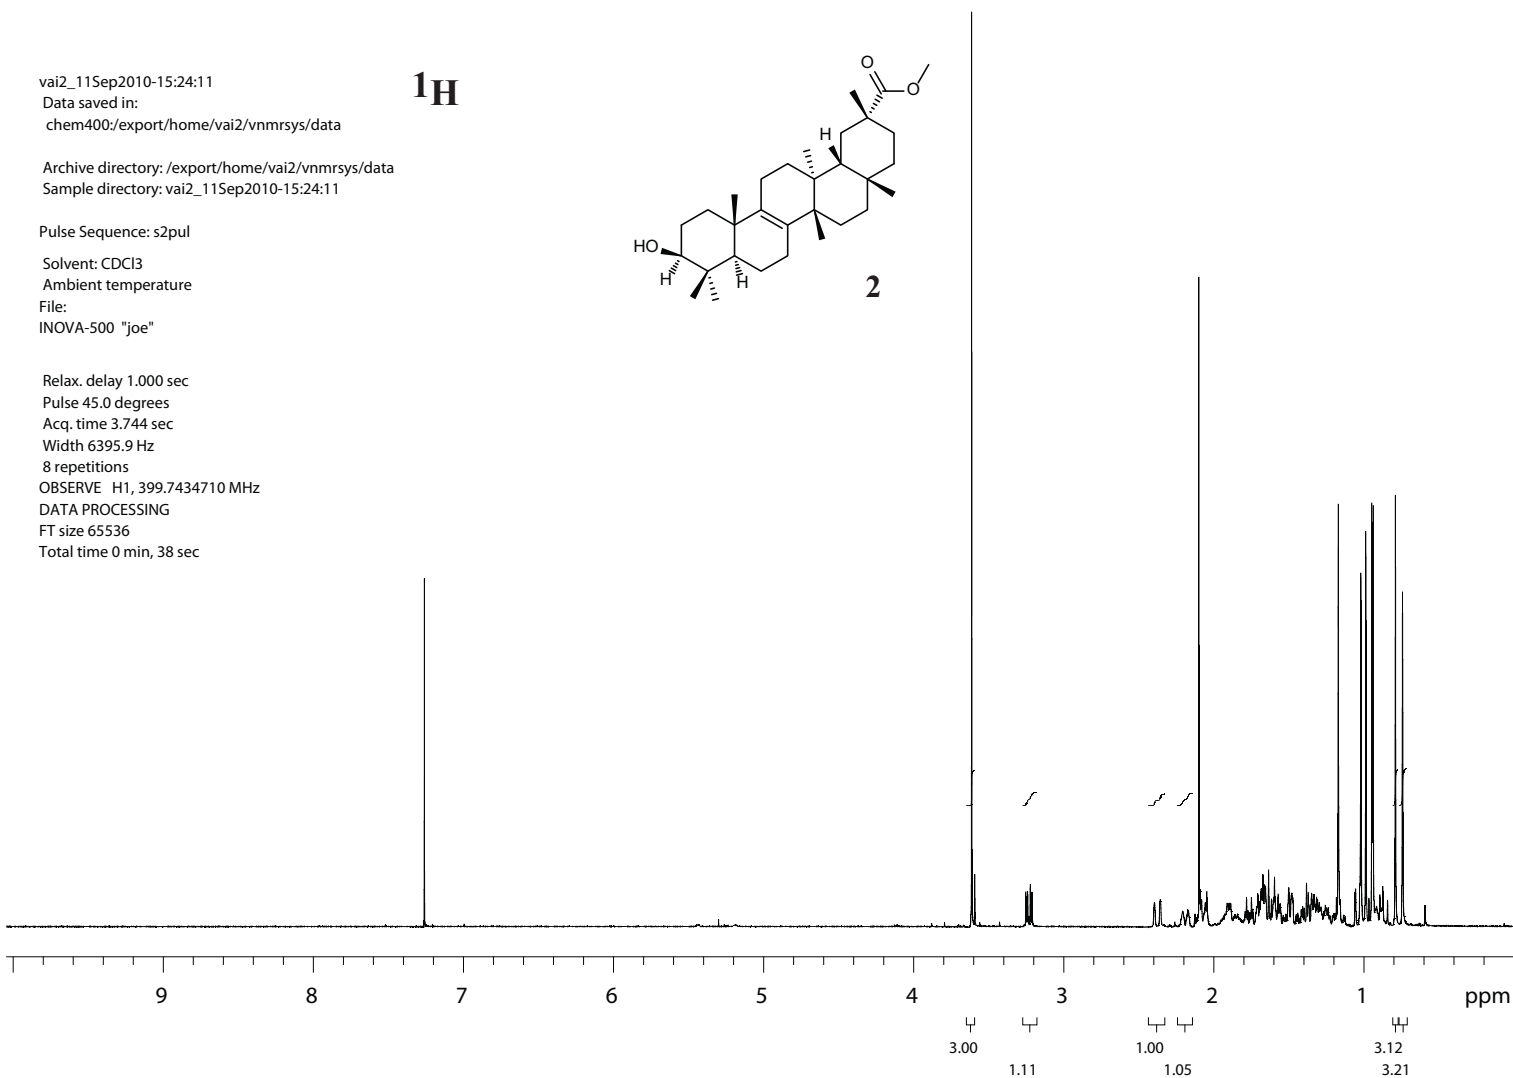

STANDARD CARBON PARAMETERS

Pulse Sequence: s2pul

Solvent: CDCl<sub>3</sub>  
Temp. 25.0 C / 298.1 K  
User: 1-14-87  
File: C13  
INOVA-500 "joe"

Pulse 58.7 degrees  
Acq. time 1.300 sec  
Width 40000.0 Hz  
192 repetitions  
OBSERVE C13, 150.8466510 MHz  
DECOUPLE H1, 599.9097318 MHz  
Power 42 dB  
continuously on  
WALTZ-16 modulated  
DATA PROCESSING  
Line broadening 1.0 Hz  
FT size 131072  
Total time 44 min, 41 sec

<sup>13</sup>C

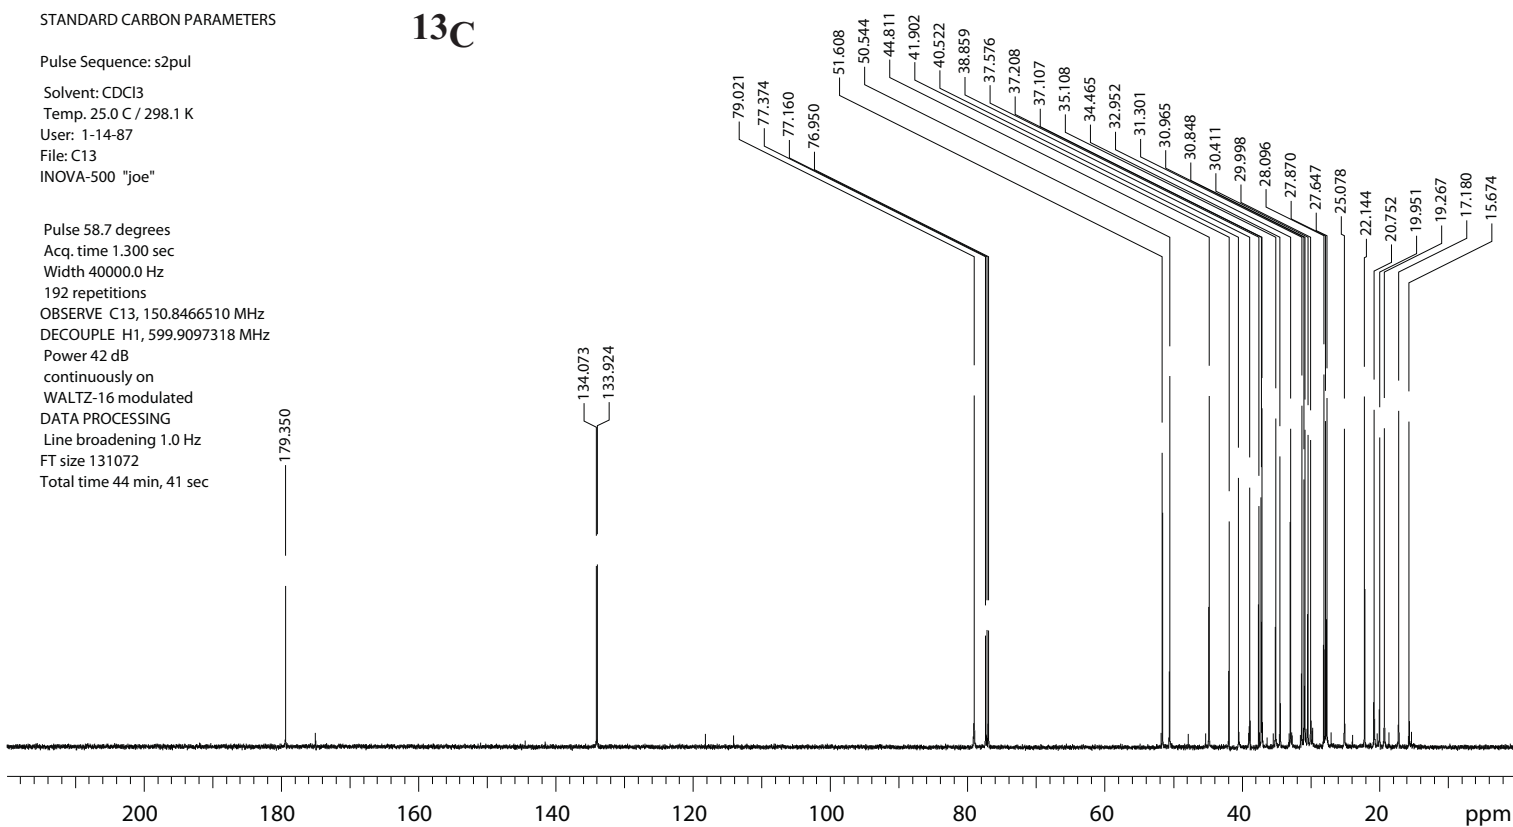

Figure S15. <sup>1</sup>H and <sup>13</sup>C spectra of 3.

vai2\_04Nov2010

Data saved in:  
chem400:/export/home/vai2/vnmrsys/data

Archive directory: /export/home/vai2/vnmrsys/data  
Sample directory: vai2\_04Nov2010

Pulse Sequence: s2pul

Solvent: CDCl<sub>3</sub>  
Ambient temperature  
File:  
INOVA-500 "joe"

Relax. delay 1.000 sec  
Pulse 45.0 degrees  
Acq. time 3.744 sec  
Width 6395.9 Hz  
8 repetitions  
OBSERVE H1, 399.7434704 MHz  
DATA PROCESSING  
FT size 65536  
Total time 0 min, 38 sec

<sup>1</sup>H

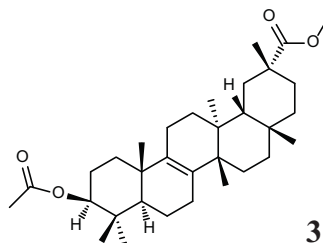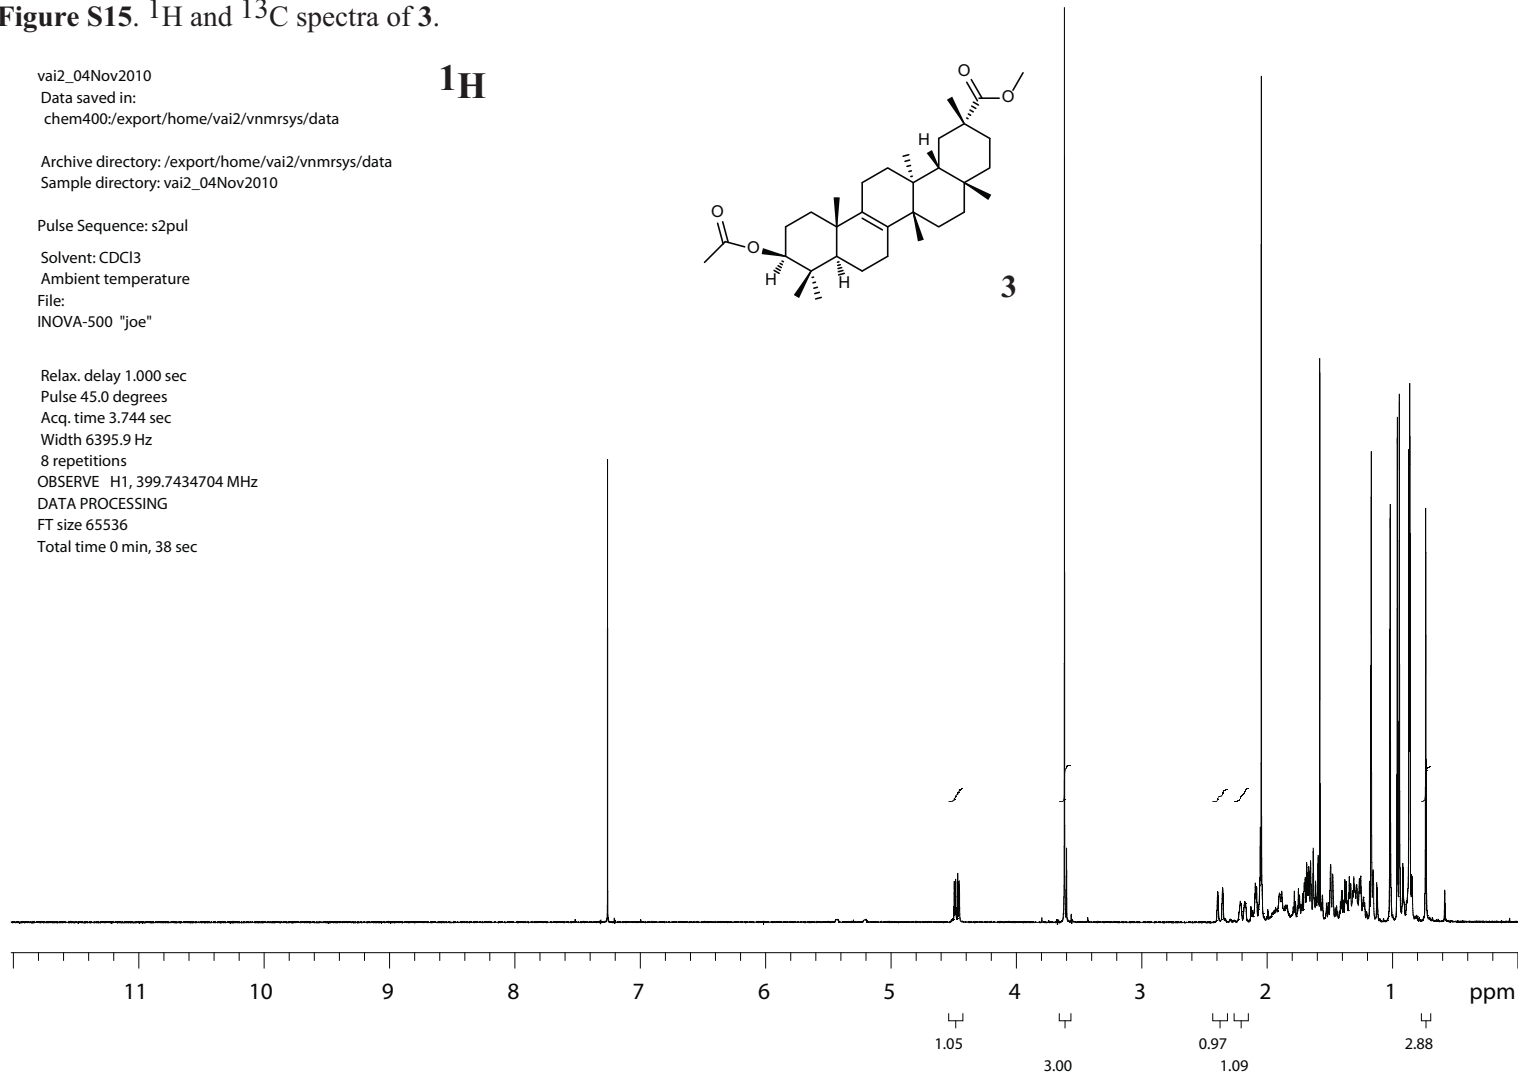

vai2\_06Jul2010-12:14:41

Data saved in:  
chem400:/export/home/vai2/vnmrsys/data

Archive directory: /export/home/vai2/vnmrsys/data  
Sample directory: vai2\_06Jul2010-12:14:41

Pulse Sequence: s2pul

Solvent: CDCl<sub>3</sub>  
Ambient temperature  
File:  
INOVA-500 "joe"

Relax. delay 1.000 sec  
Pulse 45.0 degrees  
Acq. time 1.199 sec  
Width 25125.6 Hz  
256 repetitions  
OBSERVE C13, 100.5155623 MHz  
DECOUPLE H1, 399.7454756 MHz  
Power 40 dB  
continuously on  
WALTZ-16 modulated  
DATA PROCESSING  
Line broadening 1.0 Hz  
FT size 65536  
Total time 9 min, 25 sec

<sup>13</sup>C

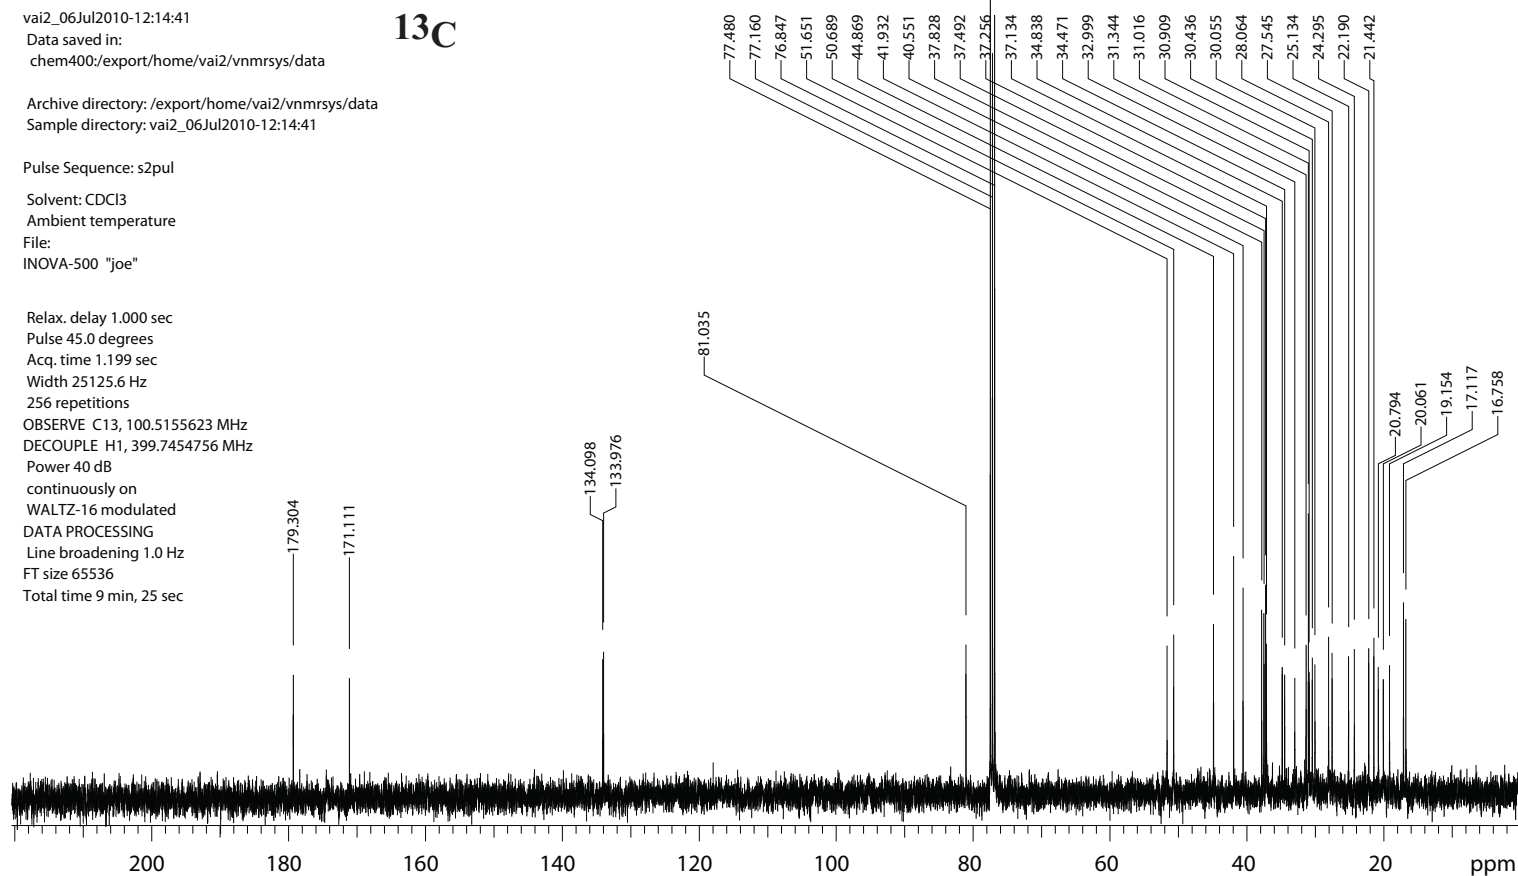

Figure S16. <sup>1</sup>H and <sup>13</sup>C spectra of 4.

vai2\_21Jan2011-10:41:34  
Data saved in:  
chem400:/export/home/vai2/vnmrsys/data

Archive directory: /export/home/vai2/vnmrsys/data  
Sample directory: vai2\_21Jan2011-10:41:34

Pulse Sequence: s2pul

Solvent: CDCl<sub>3</sub>  
Ambient temperature  
File: 1H  
INOVA-500 "joe"

Relax. delay 1.000 sec  
Pulse 45.0 degrees  
Acq. time 3.744 sec  
Width 6395.9 Hz  
8 repetitions  
OBSERVE H1, 399.7434710 MHz  
DATA PROCESSING  
FT size 65536  
Total time 0 min, 38 sec

<sup>1</sup>H

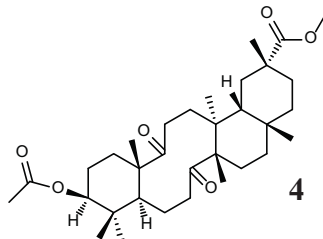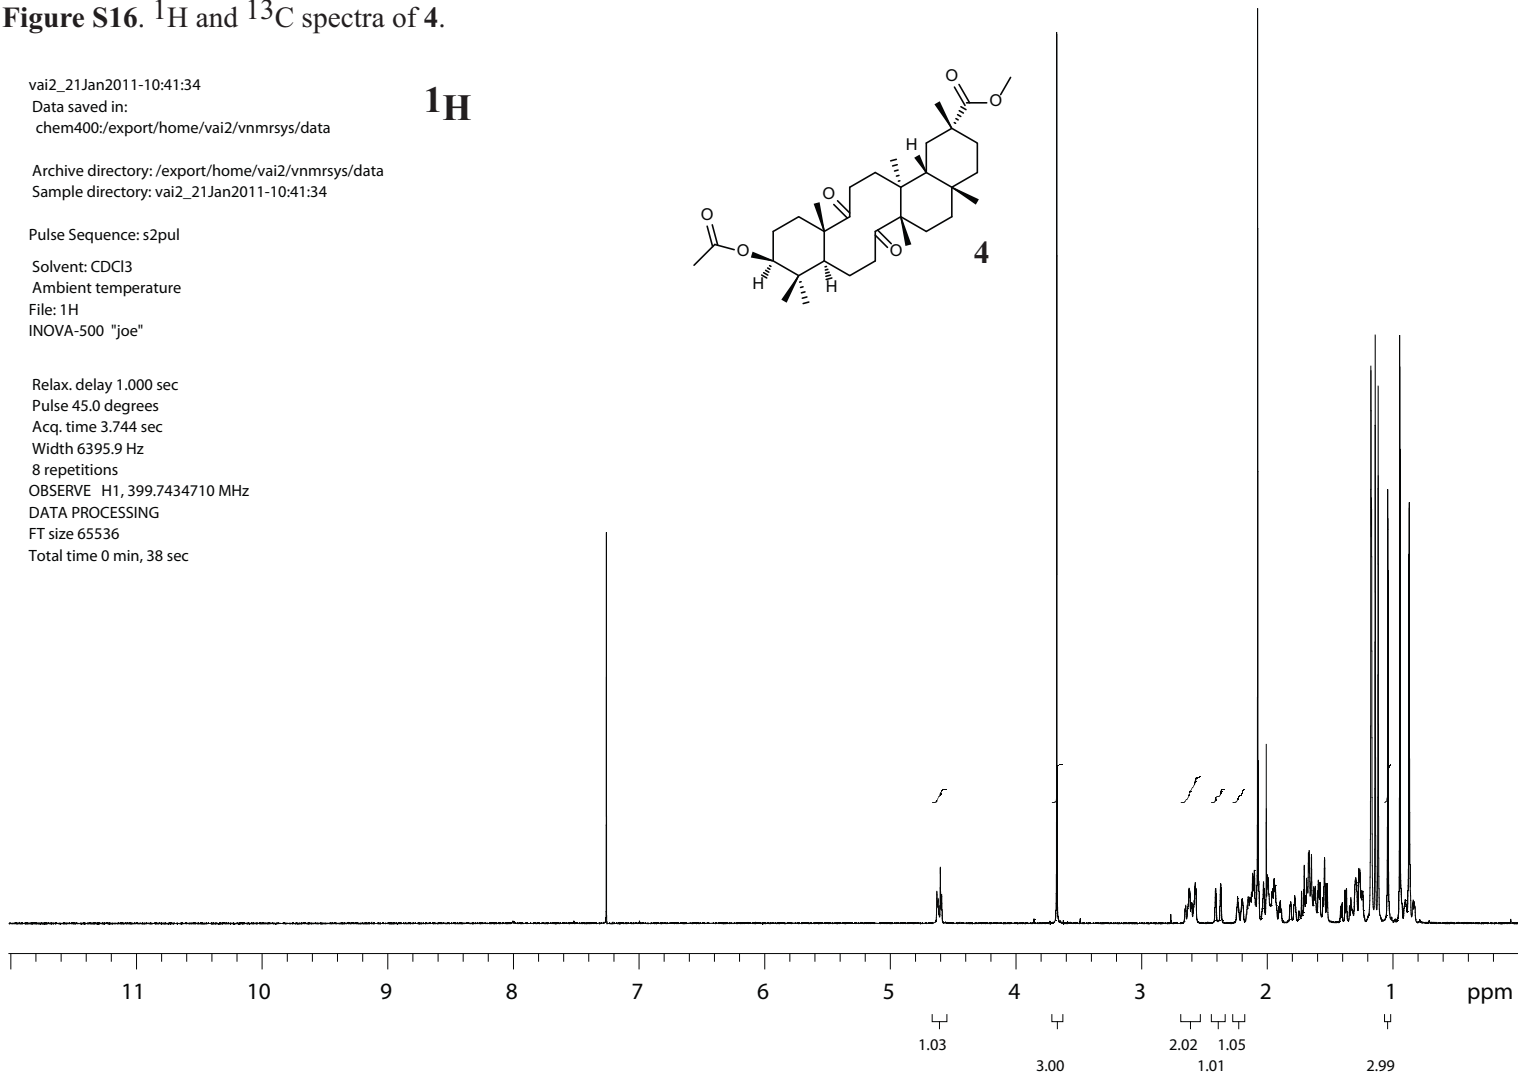

Pulse Sequence: s2pul  
Solvent: CDCl<sub>3</sub>  
Temp. 25.0 C / 298.1 K  
Pulse 58.7 degrees  
Acq. time 1.300 sec  
Width 40000.0 Hz  
320 repetitions  
OBSERVE C13, 150.8466429 MHz  
DECOUPLE H1, 599.9097318 MHz  
Power 42 dB  
continuously on  
WALTZ-16 modulated  
DATA PROCESSING  
Line broadening 0.5 Hz

<sup>13</sup>C

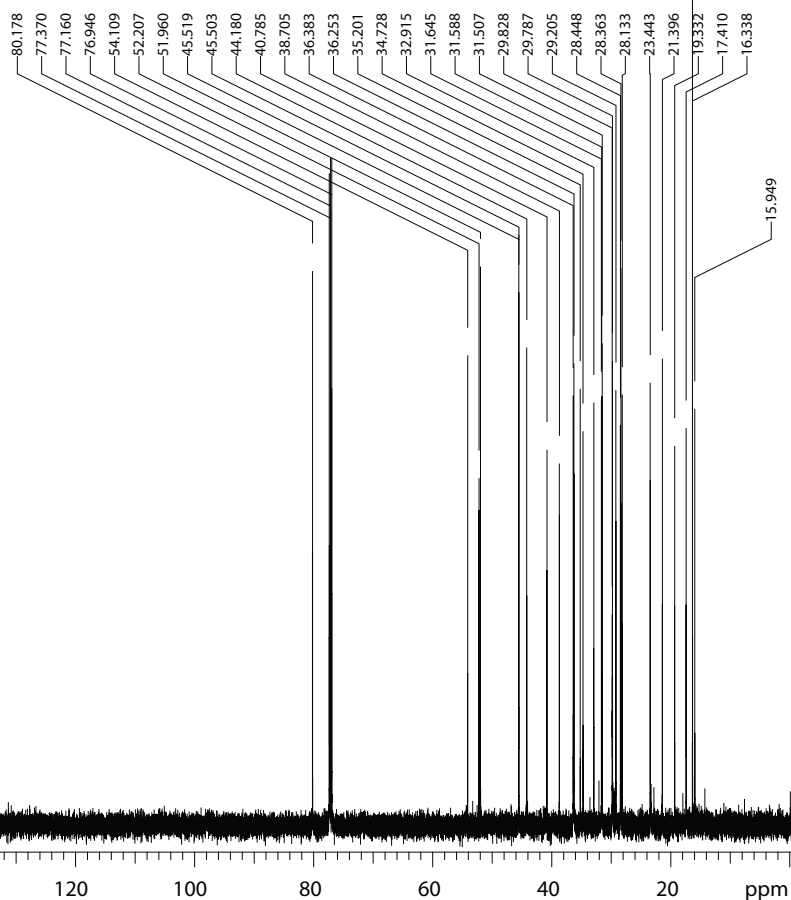

Figure S17. <sup>1</sup>H and <sup>13</sup>C spectra of 6.

vai2\_08Dec2010  
Data saved in:  
chem400:/export/home/vai2/vnmrsys/data

<sup>1</sup>H

Archive directory: /export/home/vai2/vnmrsys/data  
Sample directory: vai2\_08Dec2010

Pulse Sequence: s2pul

Solvent: CDCl<sub>3</sub>  
Ambient temperature  
File: VAI2\_094  
INOVA-500 "joe"

Relax. delay 1.000 sec  
Pulse 45.0 degrees  
Acq. time 3.744 sec  
Width 6395.9 Hz  
8 repetitions  
OBSERVE H1, 399.7434786 MHz  
DATA PROCESSING  
FT size 65536  
Total time 0 min, 38 sec

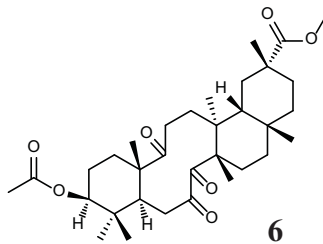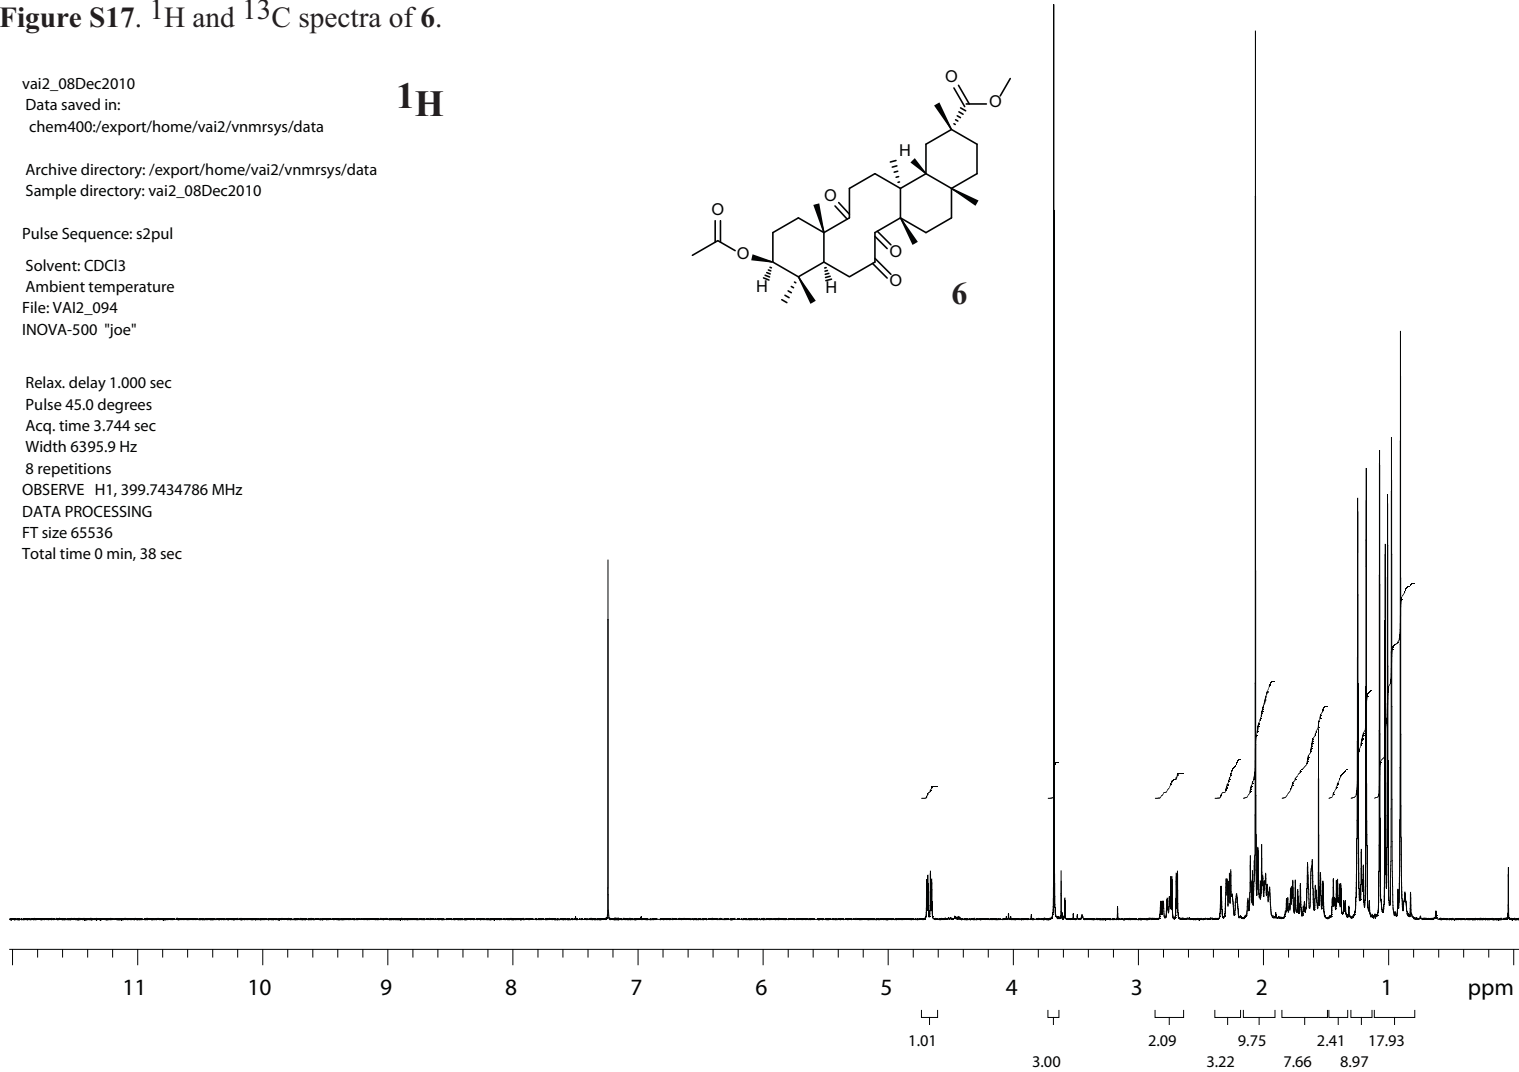

vai2\_08Dec2010-12:21:43

<sup>13</sup>C

Pulse Sequence: s2pul

Solvent: CDCl<sub>3</sub>  
Ambient temperature

Relax. delay 1.000 sec  
Pulse 45.0 degrees  
Acq. time 1.199 sec  
Width 25125.6 Hz  
832 repetitions  
OBSERVE C13, 100.5155630 MHz  
DECOUPLE H1, 399.7454756 MHz  
Power 40 dB  
continuously on  
WALTZ-16 modulated  
DATA PROCESSING  
Line broadening 1.0 Hz

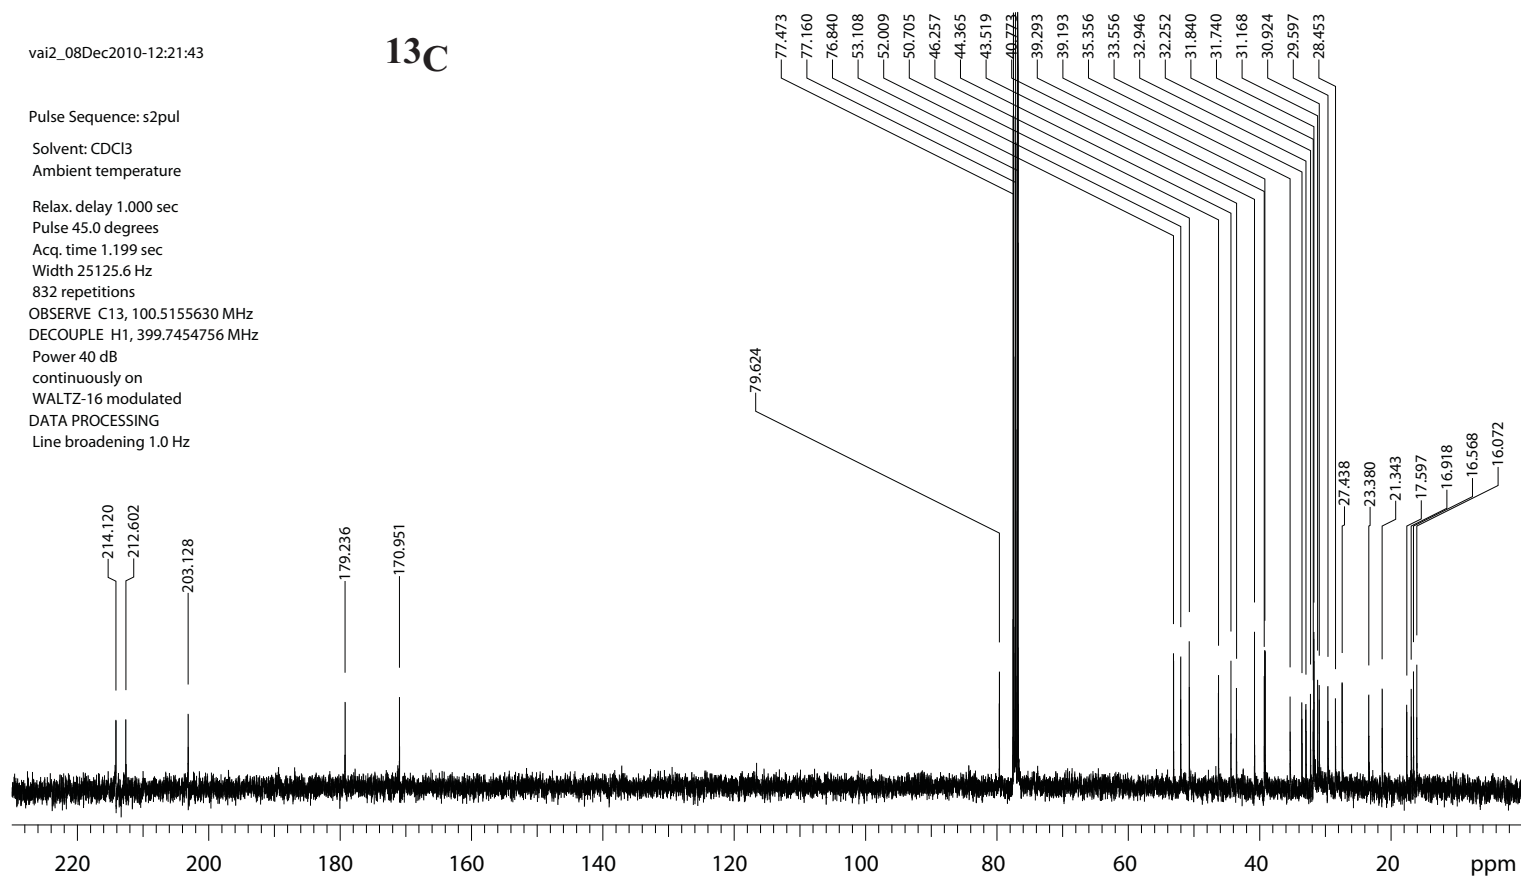



Figure S18. HMQC and HMBC spectra of **6**.

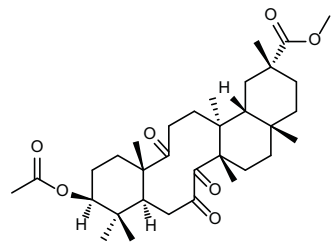

**6**

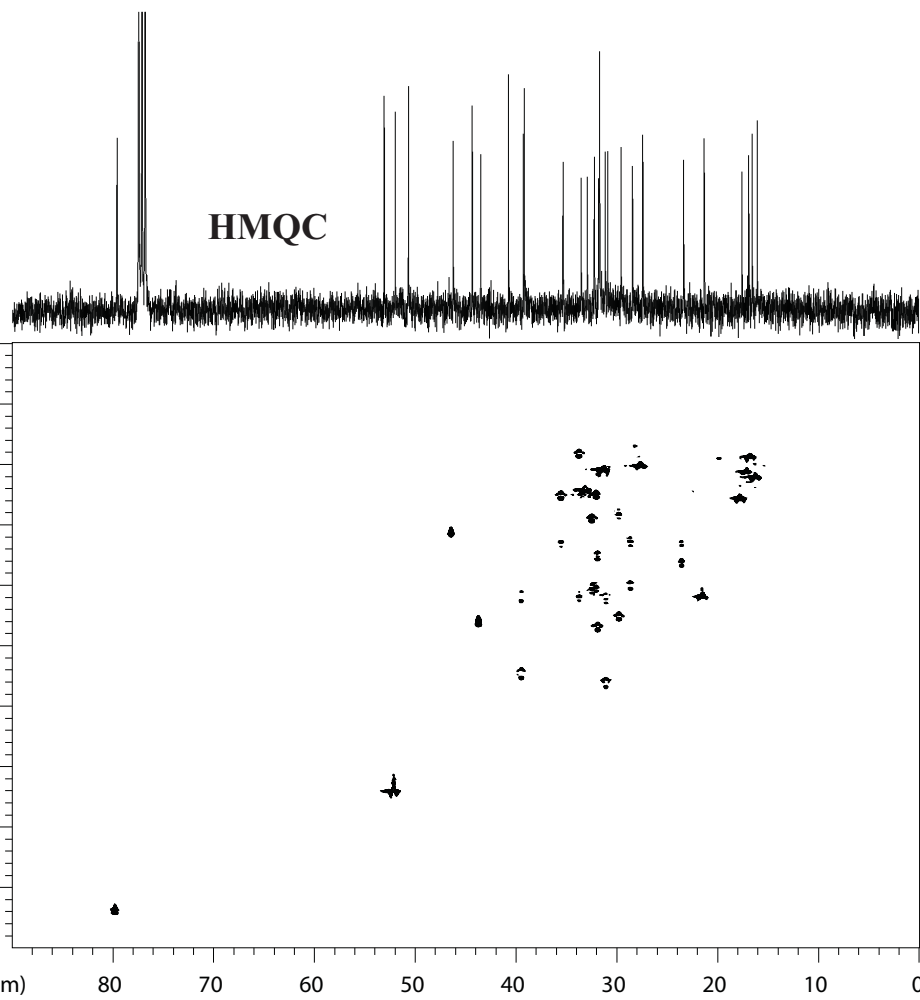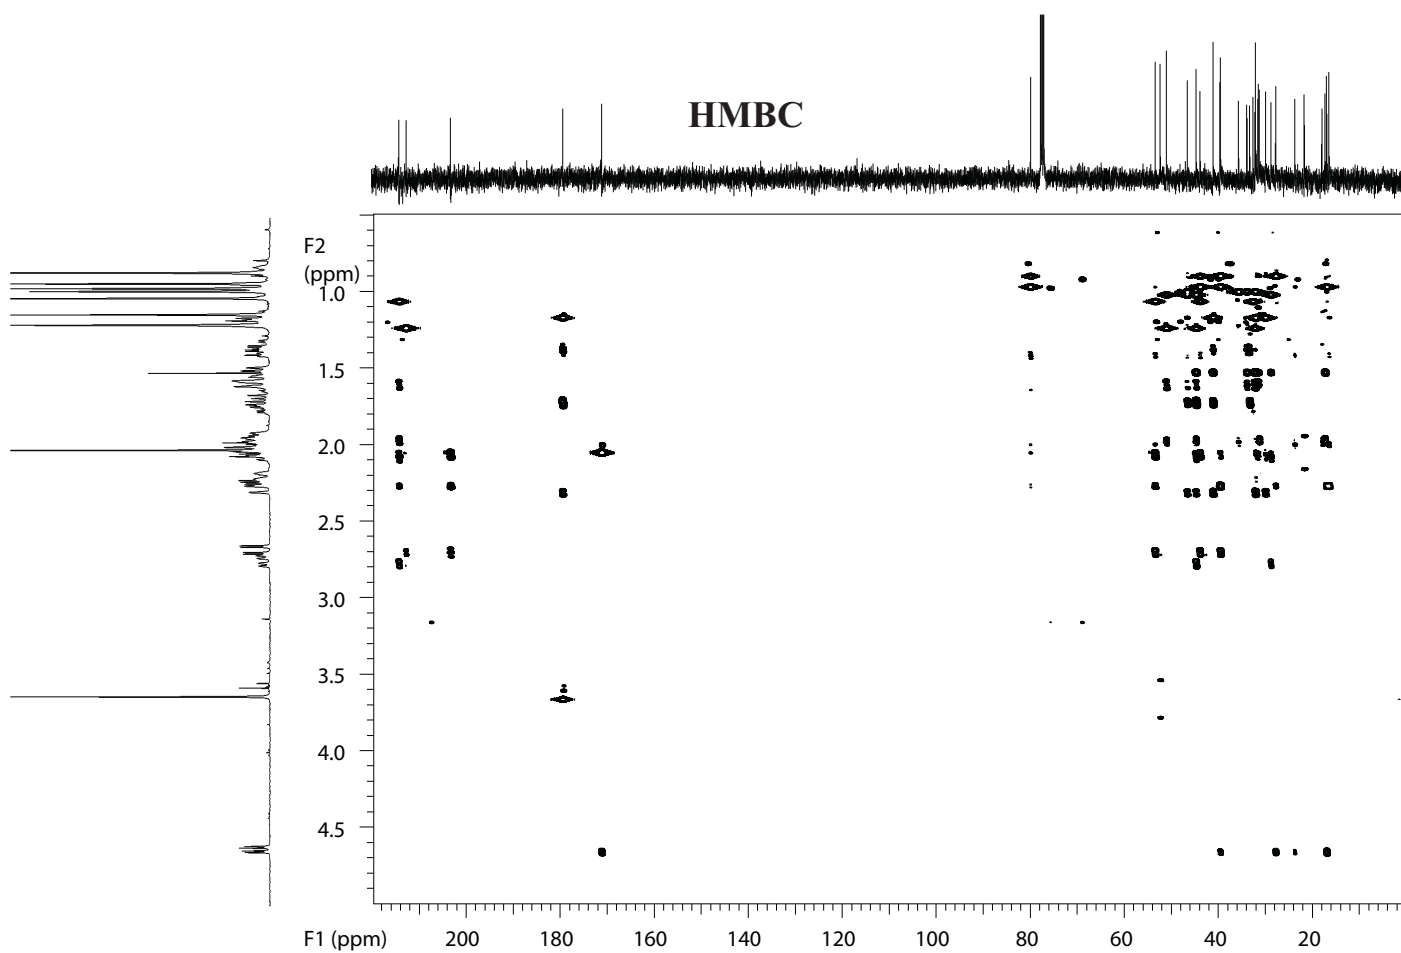

Figure S19. <sup>1</sup>H and <sup>13</sup>C spectra of 7.

vai2\_21Jan2011  
Data saved in:  
chem400:/export/home/vai2/vnmrSYS/data

Archive directory: /export/home/vai2/vnmrSYS/data  
Sample directory: vai2\_21Jan2011

Pulse Sequence: s2pul

Solvent: CDCl<sub>3</sub>  
Ambient temperature  
File: 1H  
INOVA-500 "joe"

Relax. delay 1.000 sec  
Pulse 45.0 degrees  
Acq. time 3.744 sec  
Width 6395.9 Hz  
8 repetitions  
OBSERVE H1, 399.7434710 MHz  
DATA PROCESSING  
FT size 65536  
Total time 0 min, 38 sec

<sup>1</sup>H

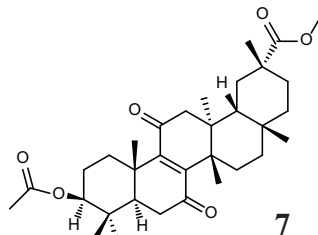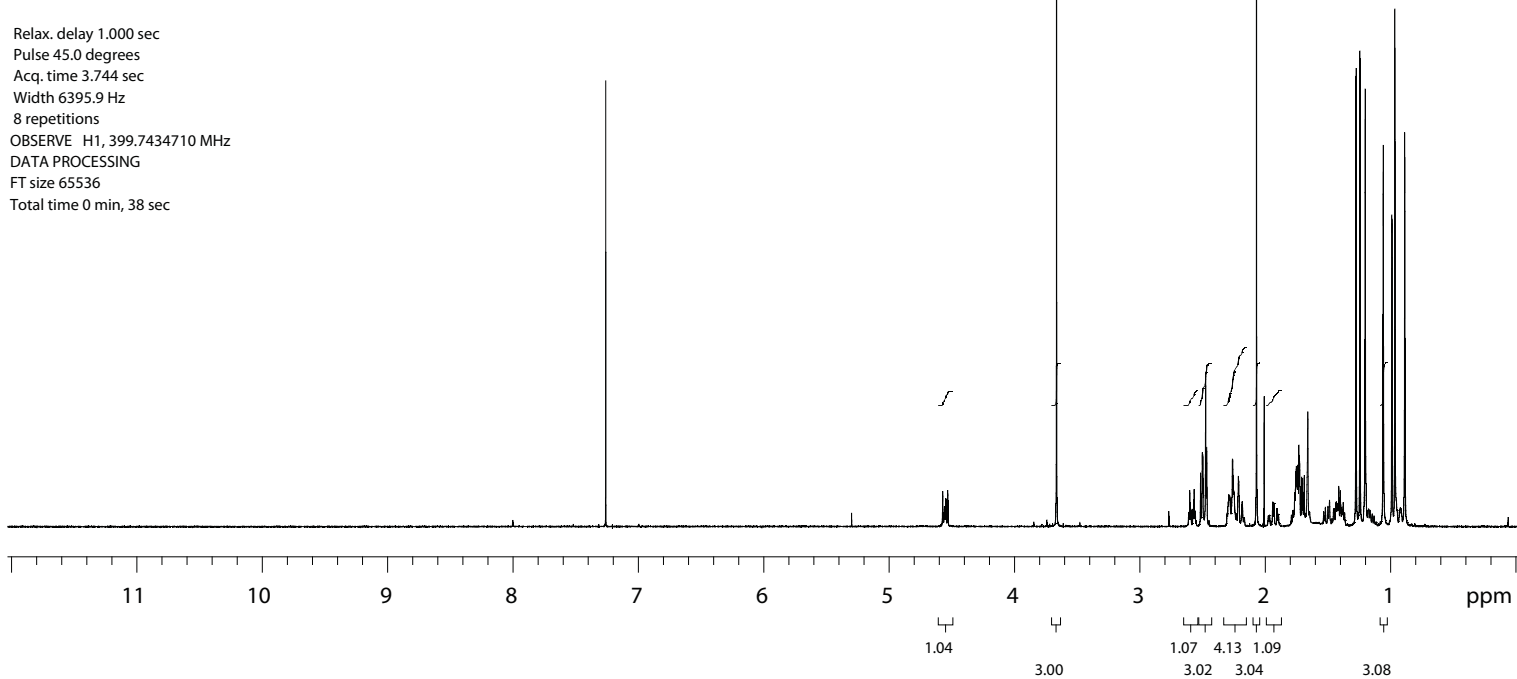

Sample 101

Pulse Sequence: s2pul

Solvent: CDCl<sub>3</sub>  
Temp. 25.0 C / 298.1 K  
User: 1-14-87  
File: 13C  
INOVA-500 "joe"

Pulse 58.7 degrees  
Acq. time 1.300 sec  
Width 40000.0 Hz  
640 repetitions  
OBSERVE C13, 150.8466417 MHz  
DECOUPLE H1, 599.9097318 MHz  
Power 42 dB  
continuously on  
WALTZ-16 modulated  
DATA PROCESSING  
Line broadening 0.5 Hz  
FT size 131072  
Total time 1 hr, 29 min, 10 sec

<sup>13</sup>C

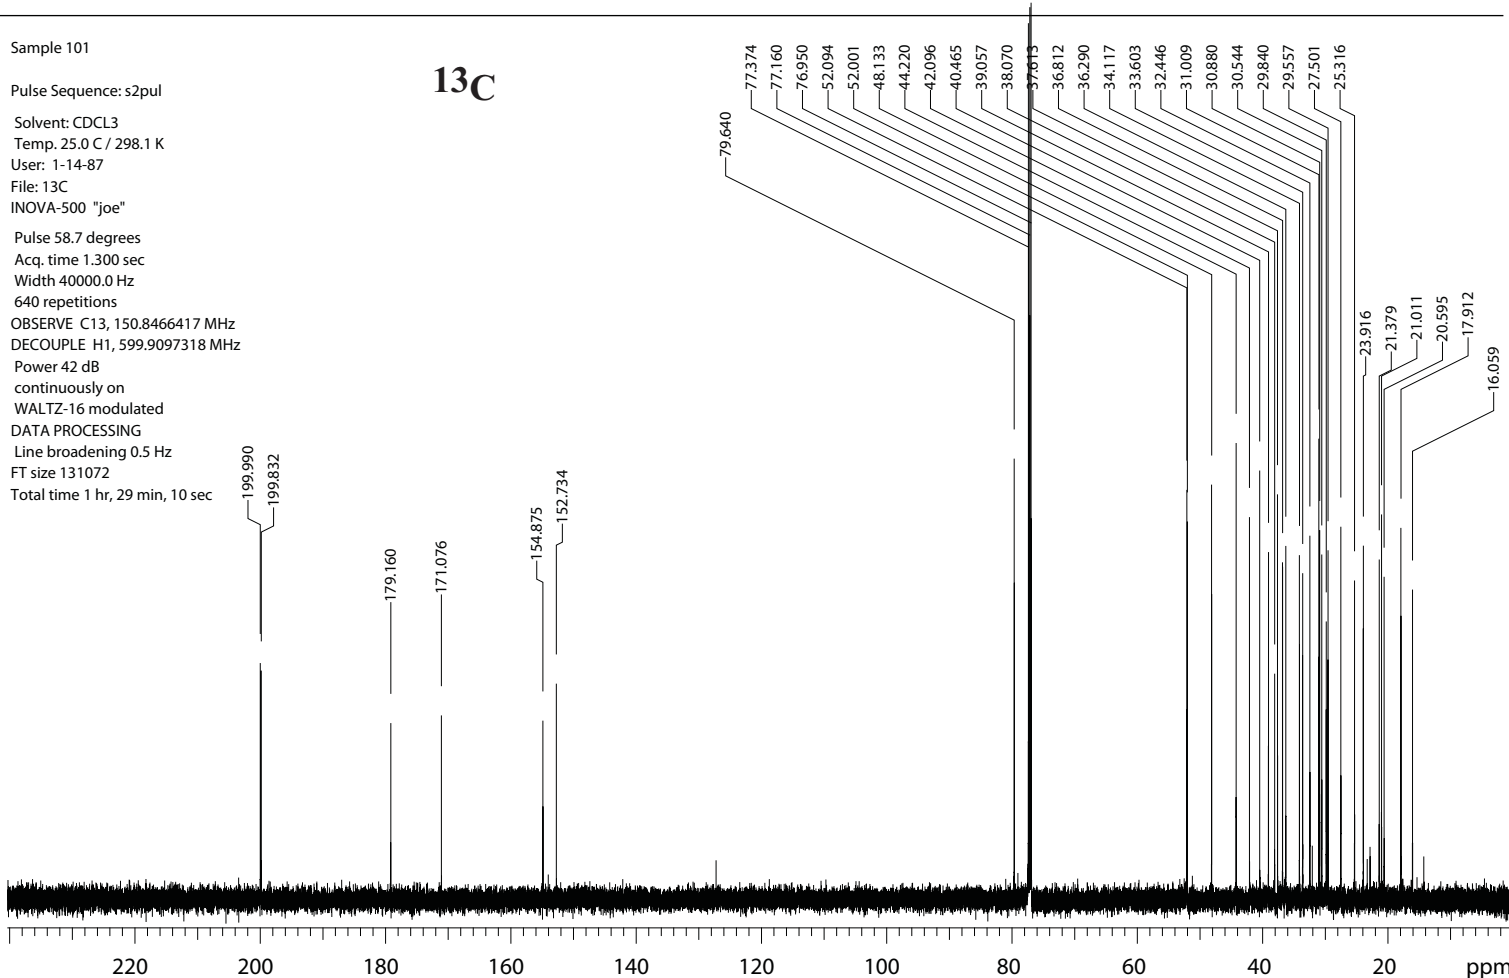

# Figure S20. <sup>1</sup>H and <sup>13</sup>C spectra of 8

vai2\_18Apr2011  
 Data saved in:  
 chem400:/export/home/vai2/vnmrsys/data

Archive directory: /export/home/vai2/vnmrsys/data  
 Sample directory: vai2\_18Apr2011  
 File: PROTON

Pulse Sequence: s2pul

Solvent: CDCl<sub>3</sub>  
 Ambient temperature  
 INOVA-400 "chem400"

Relax. delay 1.000 sec  
 Pulse 45.0 degrees  
 Acq. time 3.744 sec  
 Width 6395.9 Hz  
 8 repetitions  
 OBSERVE H1, 399.7434710 MHz  
 DATA PROCESSING  
 FT size 65536  
 Total time 0 min, 38 sec

## <sup>1</sup>H

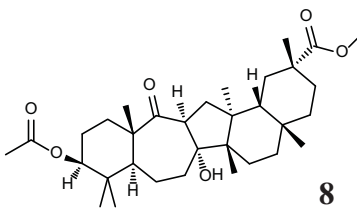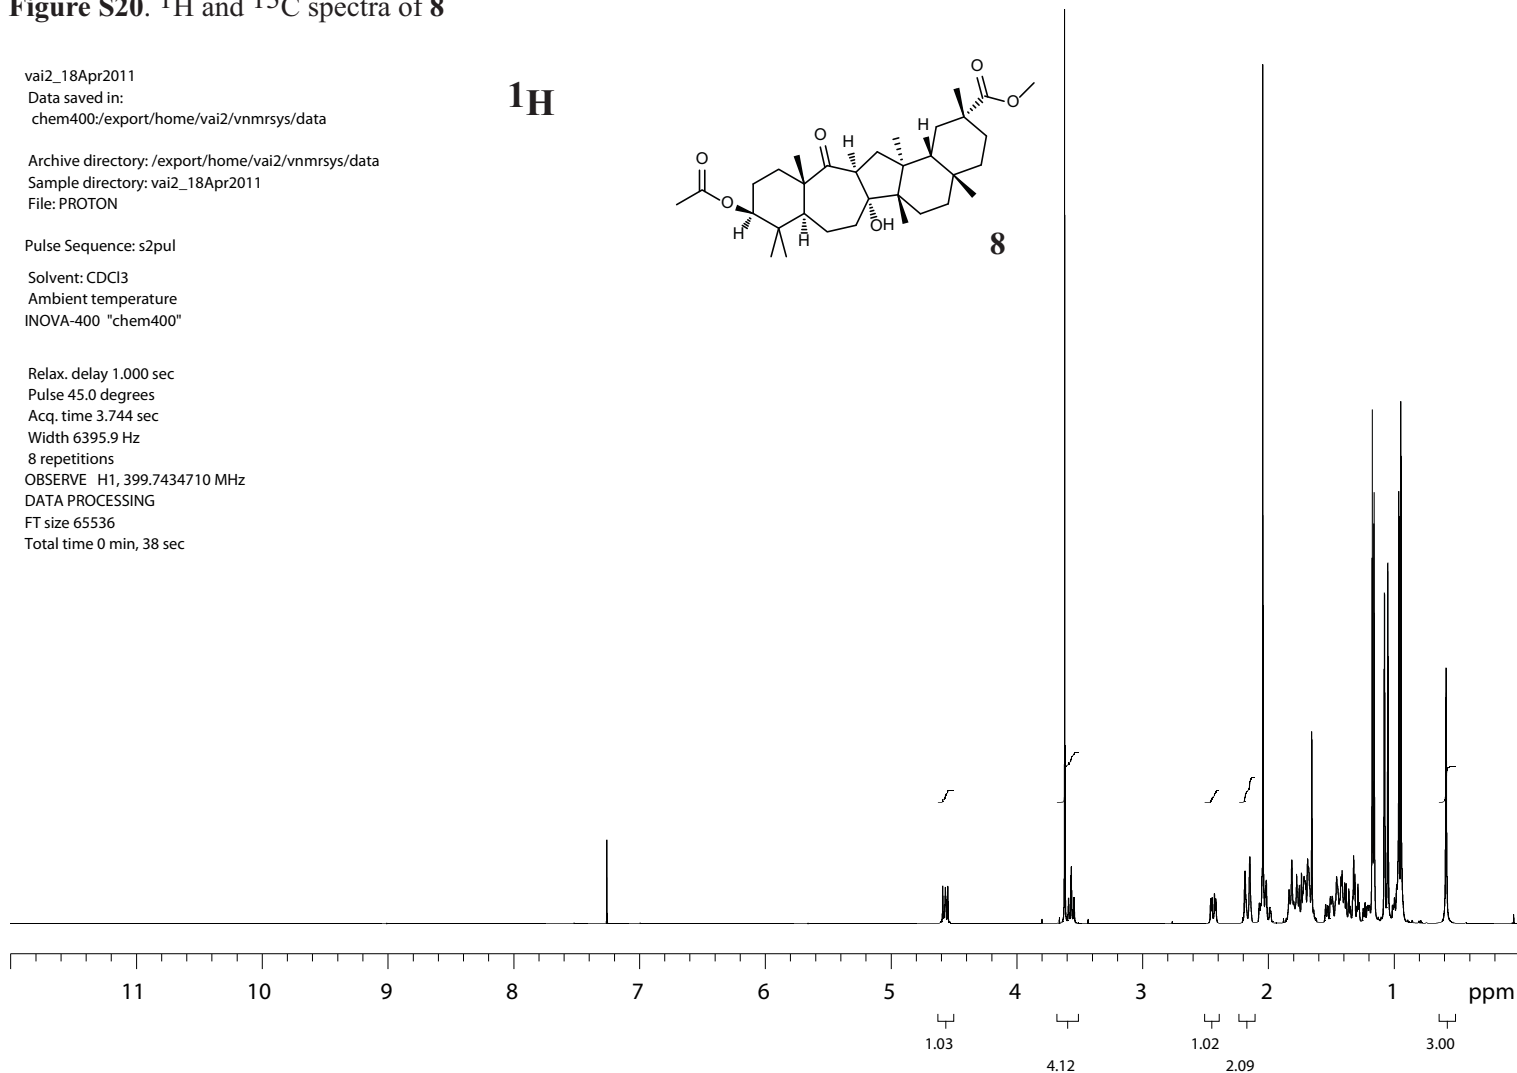

Pulse Sequence: s2pul

Solvent: CDCl<sub>3</sub>  
 Temp. 25.0 C / 298.1 K  
 Pulse 58.7 degrees  
 Acq. time 1.300 sec  
 Width 40000.0 Hz  
 160 repetitions  
 OBSERVE C13, 150.8466450 MHz  
 DECOUPLE H1, 599.9097318 MHz  
 Power 42 dB  
 continuously on  
 WALTZ-16 modulated  
 DATA PROCESSING  
 Line broadening 0.5 Hz

## <sup>13</sup>C

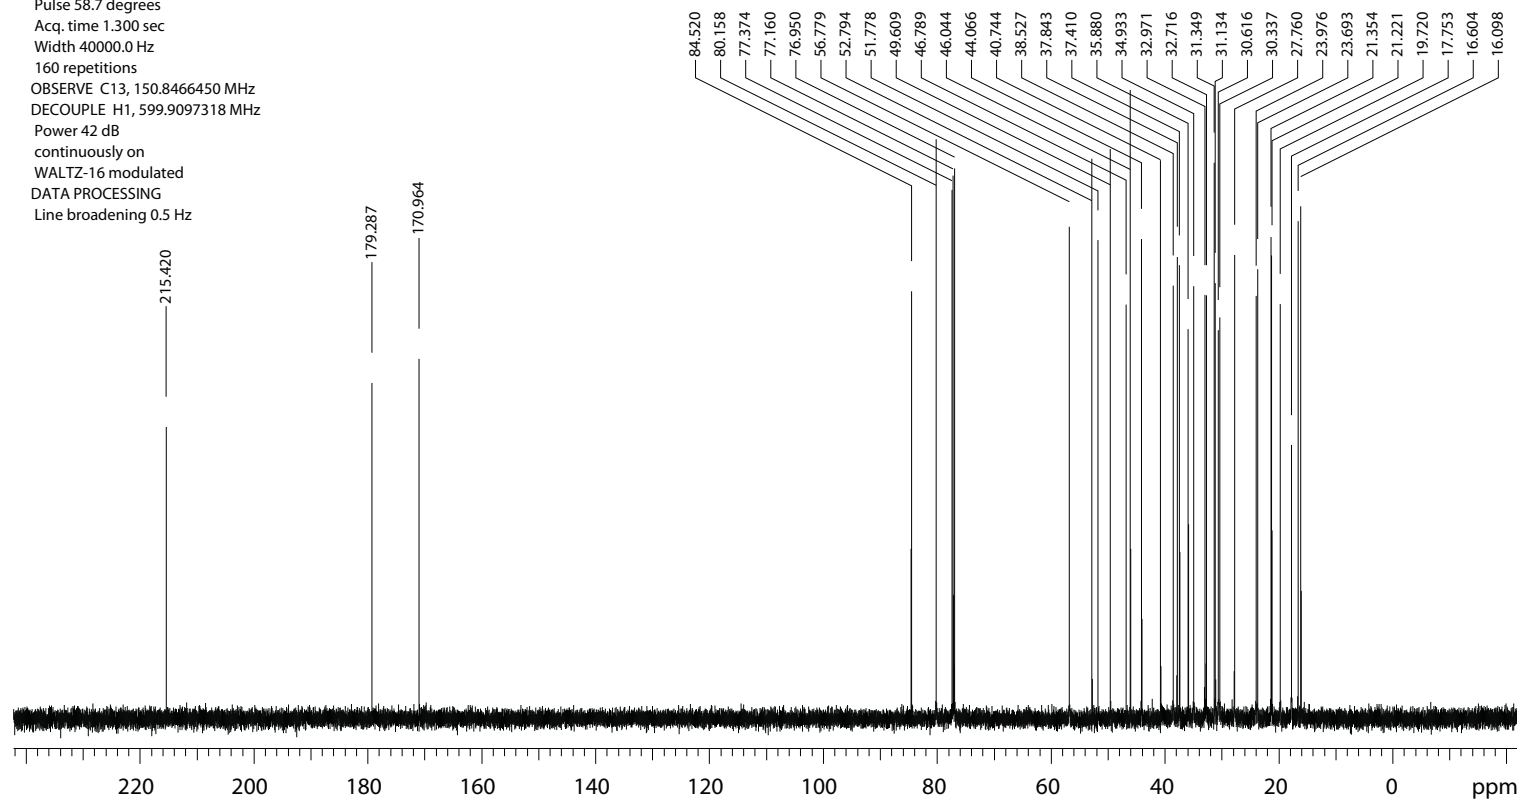

Figure S21. HMQC and HMBC spectra of **8**.

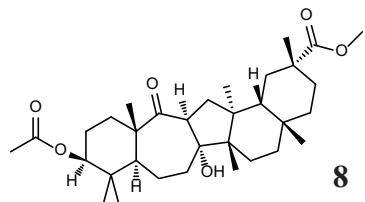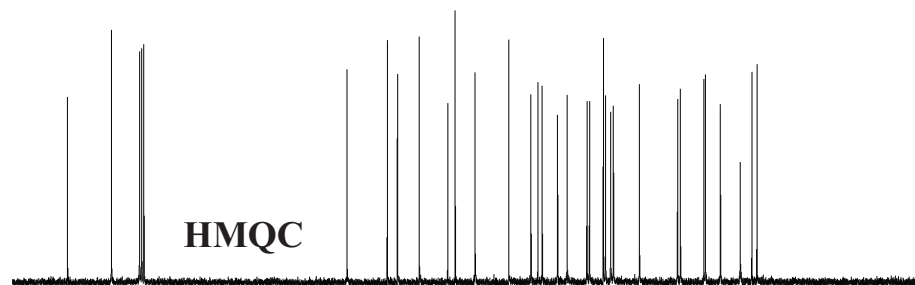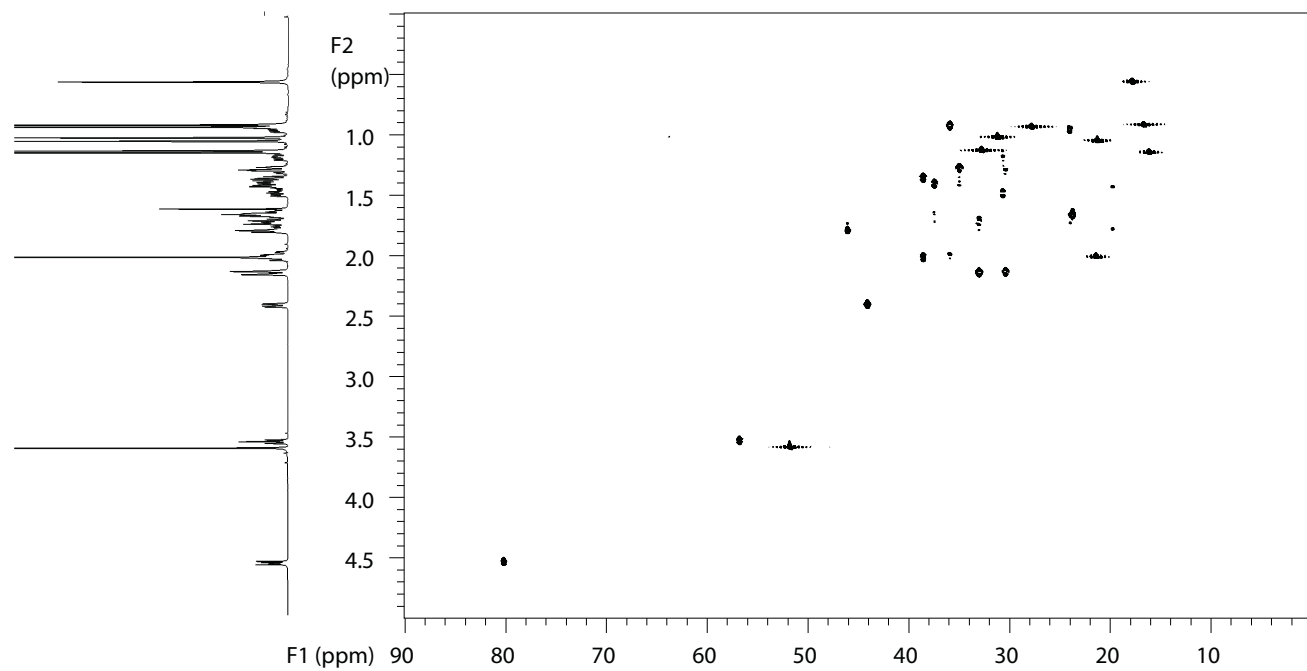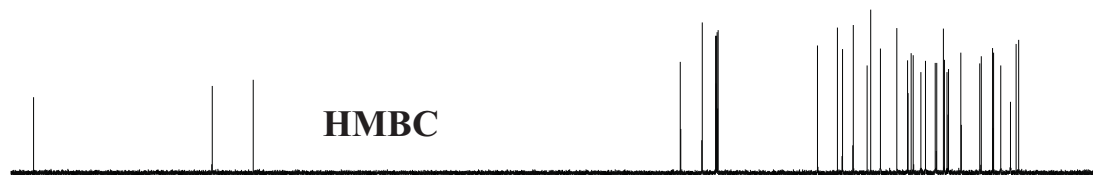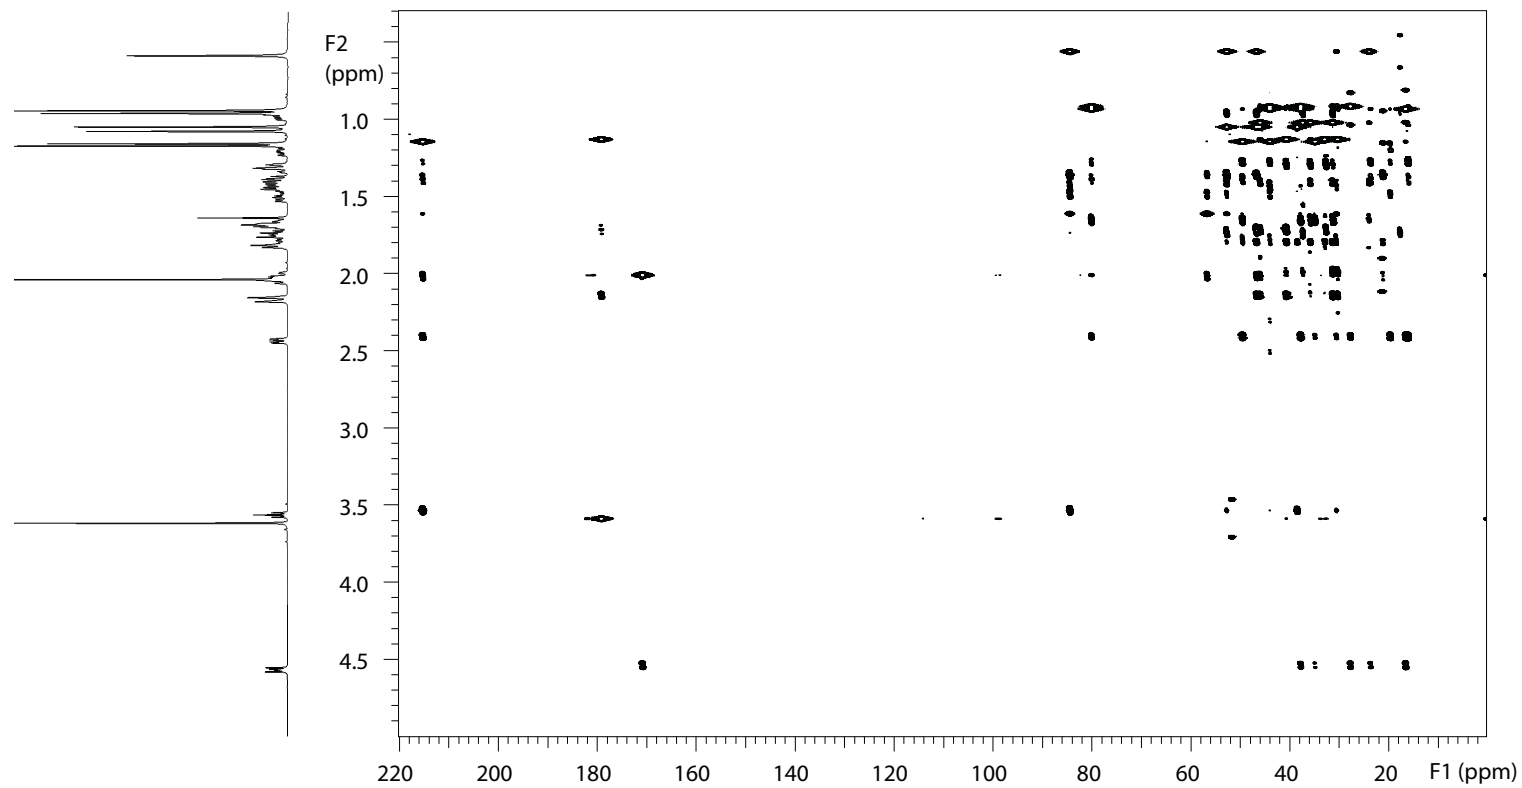

Figure S22. COSY and NOESY spectra of **8**.

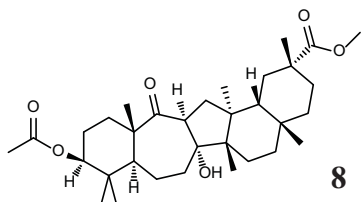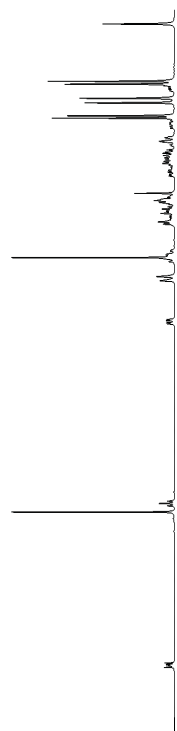

F1  
(ppm)

COSY

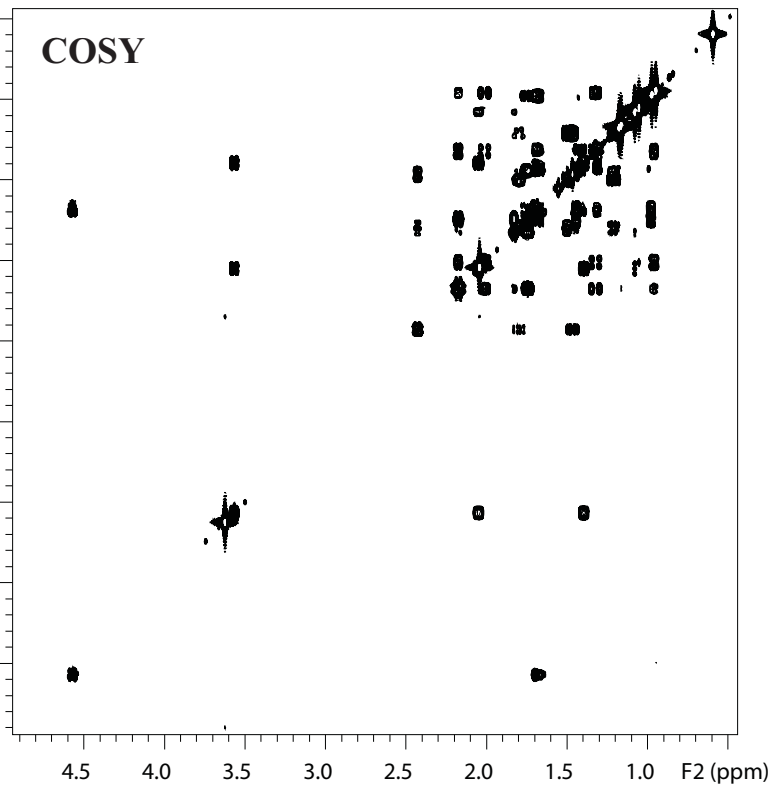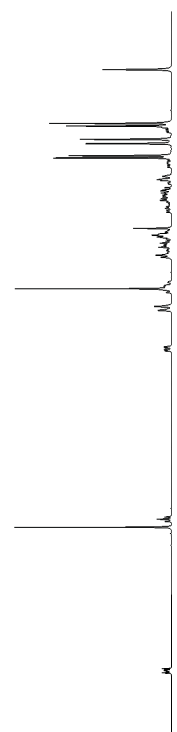

F2  
(ppm)

NOESY

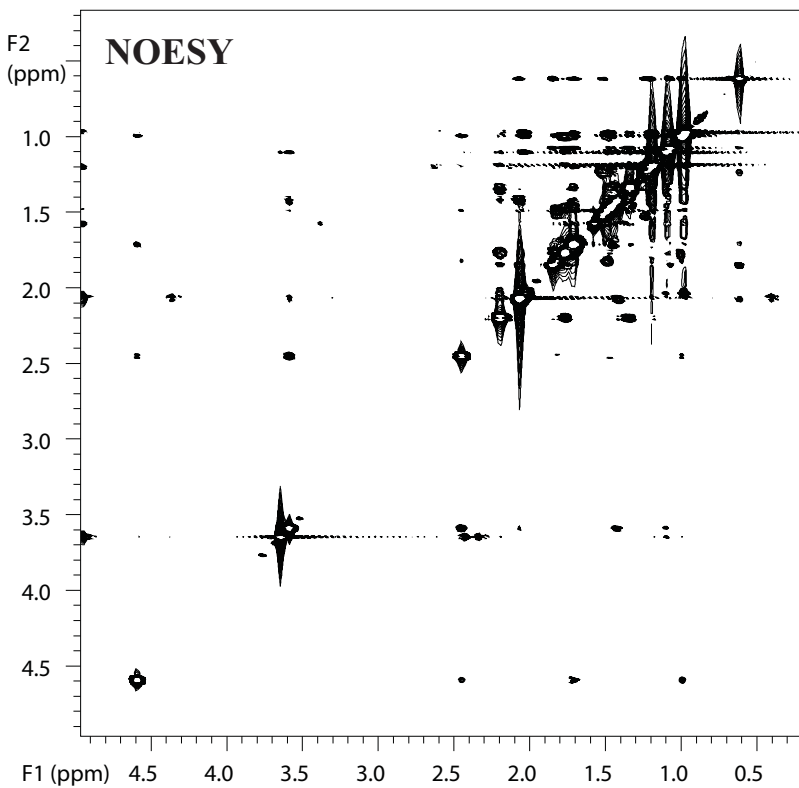

# Figure S23. <sup>1</sup>H and <sup>13</sup>C spectra of **9**

vai\_2\_18Apr2011-16:47:41  
Data saved in:  
chem400:/export/home/vai2/vnmrsys/data

Archive directory: /export/home/vai2/vnmrsys/data  
Sample directory: vai2\_18Apr2011-16:47:41  
File: 1H

Pulse Sequence: s2pul  
Solvent: CDCl<sub>3</sub>  
Ambient temperature  
Operator: vai2  
File: 1H  
INOVA-500 "joe"

Relax. delay 1.000 sec  
Pulse 45.0 degrees  
Acq. time 3.744 sec  
Width 6395.9 Hz  
8 repetitions  
OBSERVE H1, 399.7434710 MHz  
DATA PROCESSING  
FT size 65536  
Total time 0 min, 38 sec

## <sup>1</sup>H

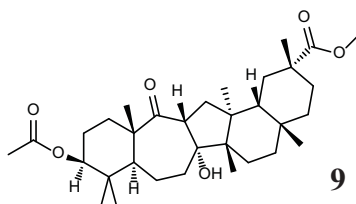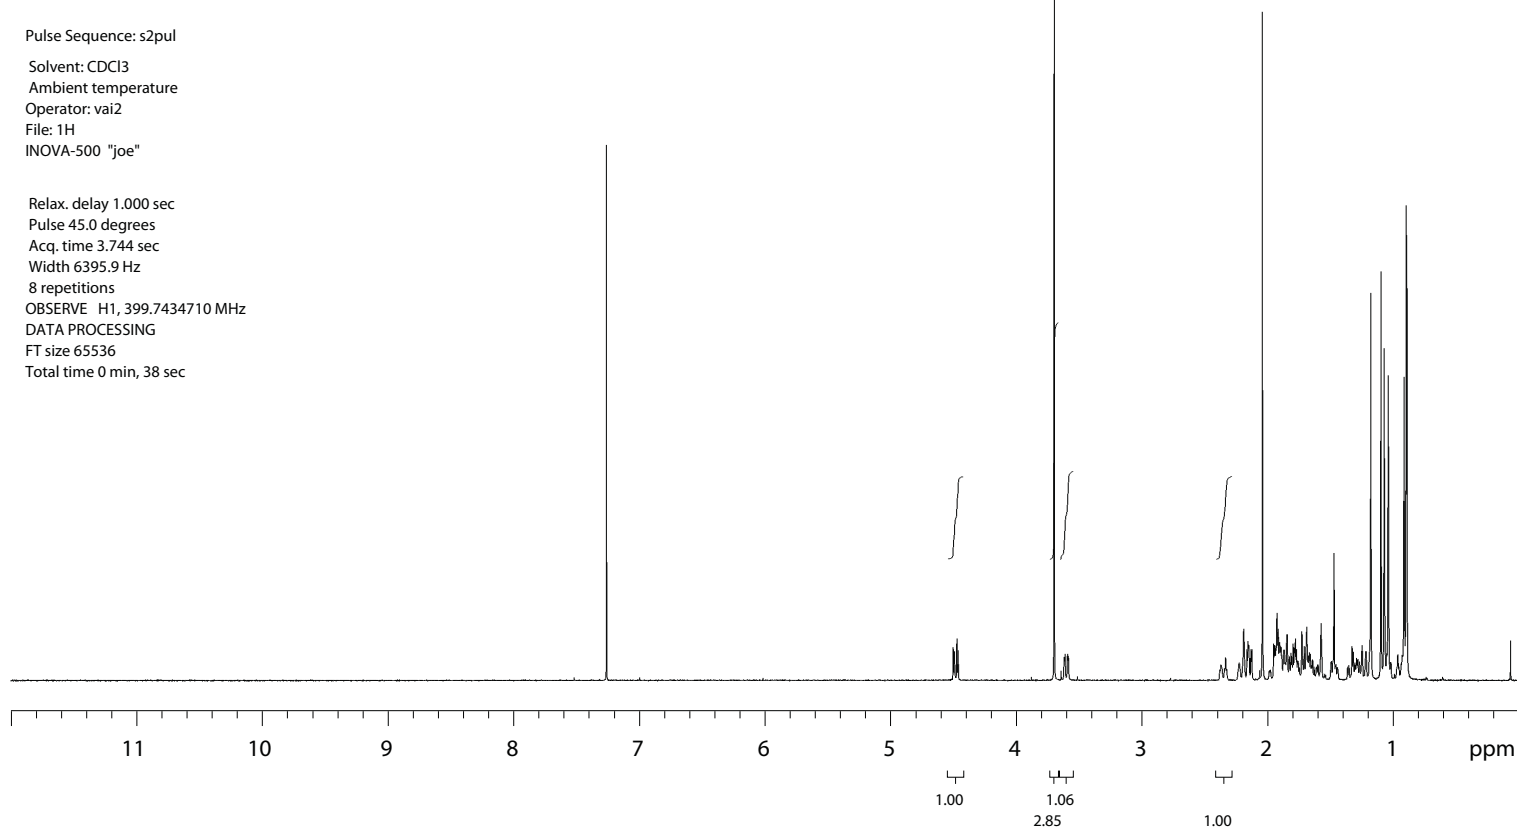

Pulse Sequence: s2pul

Solvent: CDCl<sub>3</sub>  
Temp. 25.0 C / 298.1 K

Pulse 58.7 degrees  
Acq. time 1.300 sec  
Width 40000.0 Hz  
1232 repetitions  
OBSERVE C13, 150.8466413 MHz  
DECOUPLE H1, 599.9097318 MHz  
Power 42 dB  
continuously on  
WALTZ-16 modulated  
DATA PROCESSING  
Line broadening 0.5 Hz

## <sup>13</sup>C

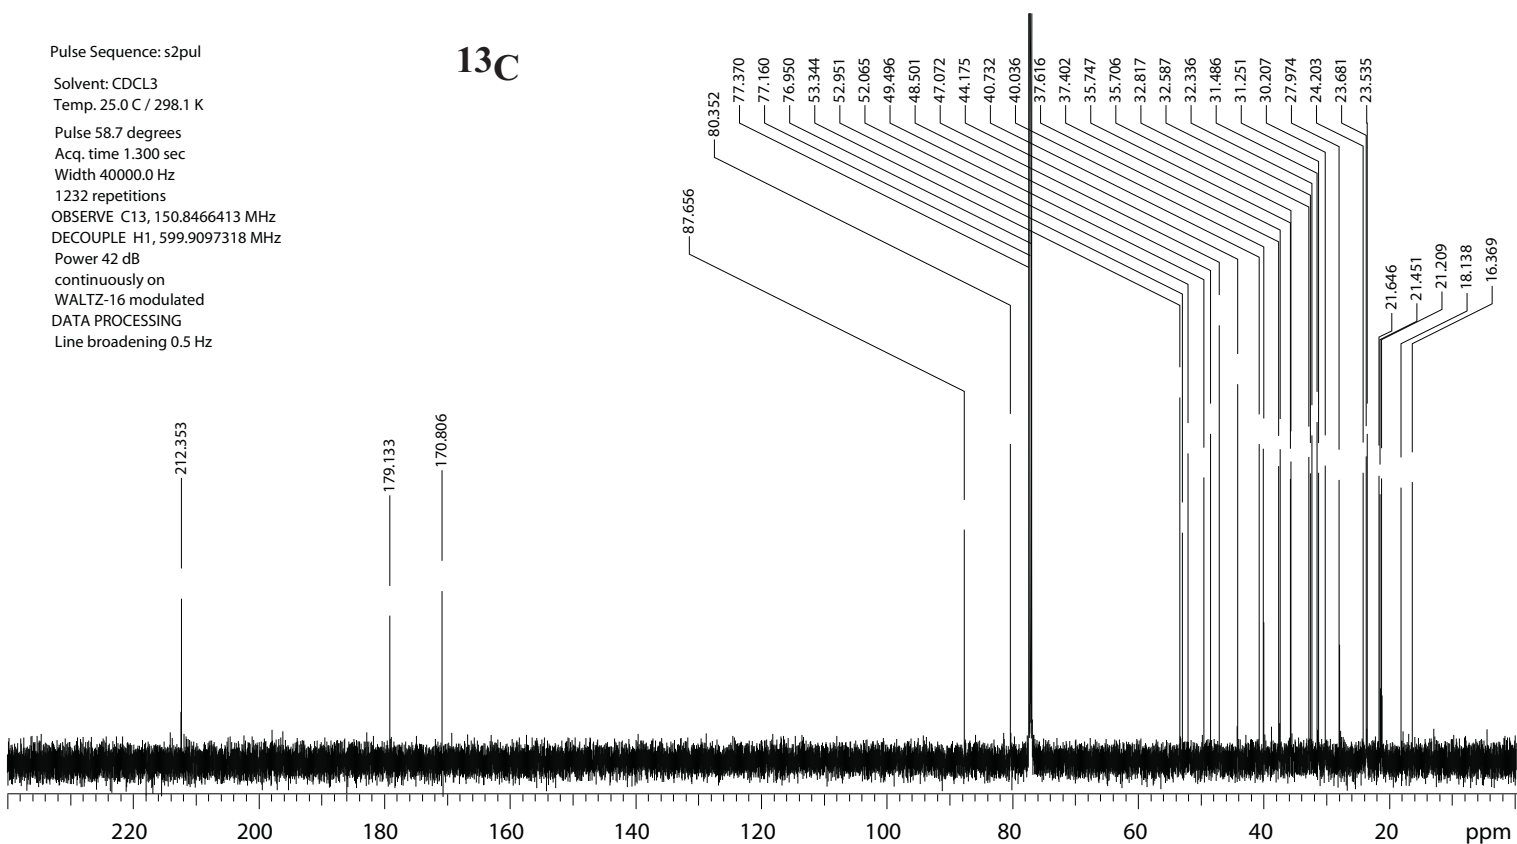

Figure S24. HMQC and HMBC spectra of **9**.

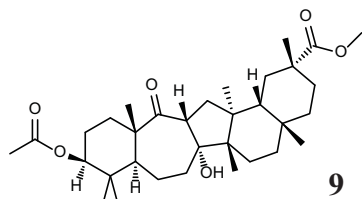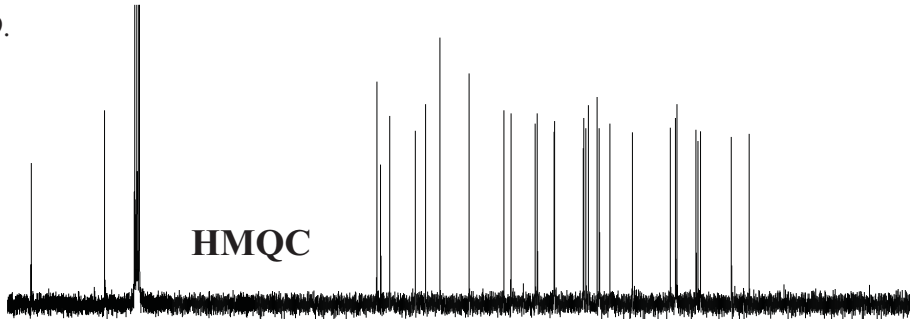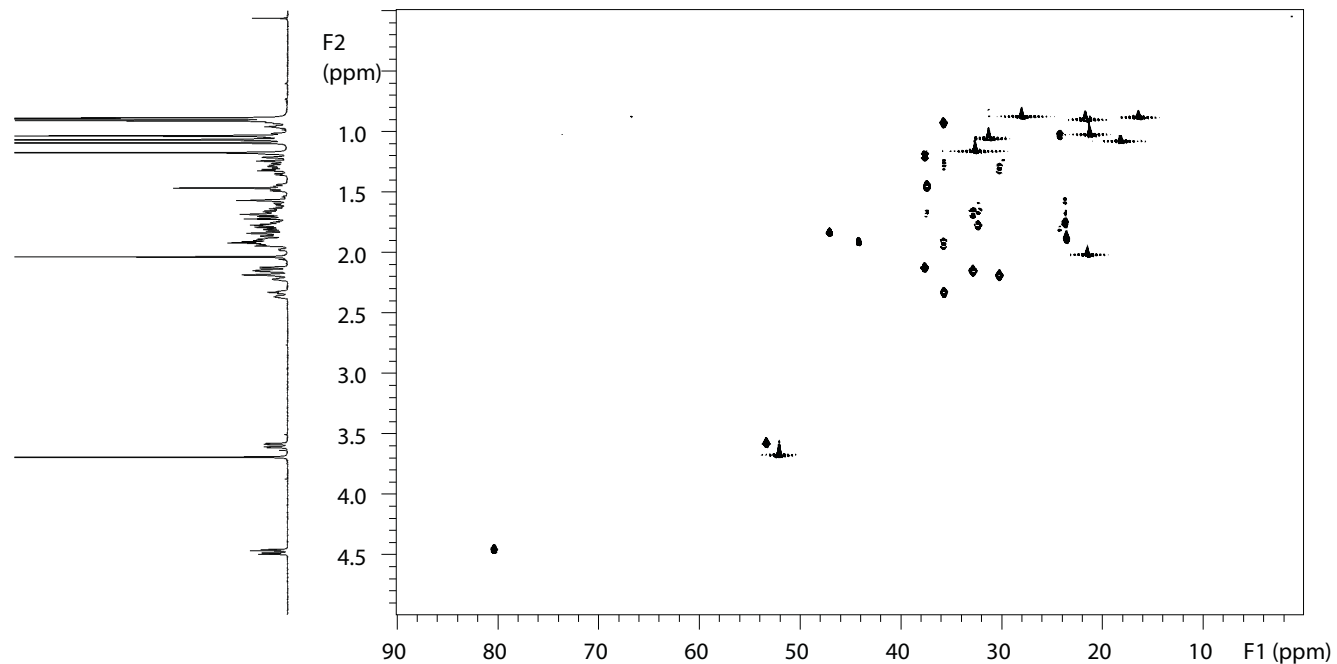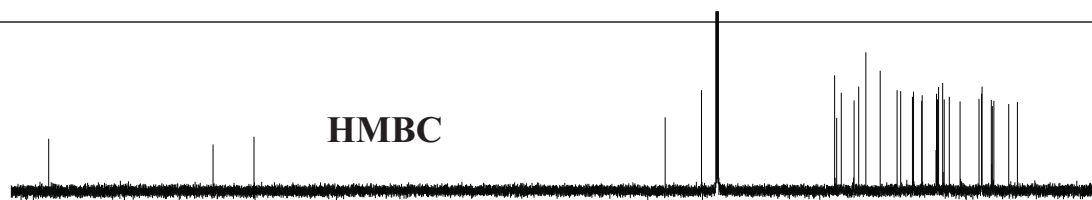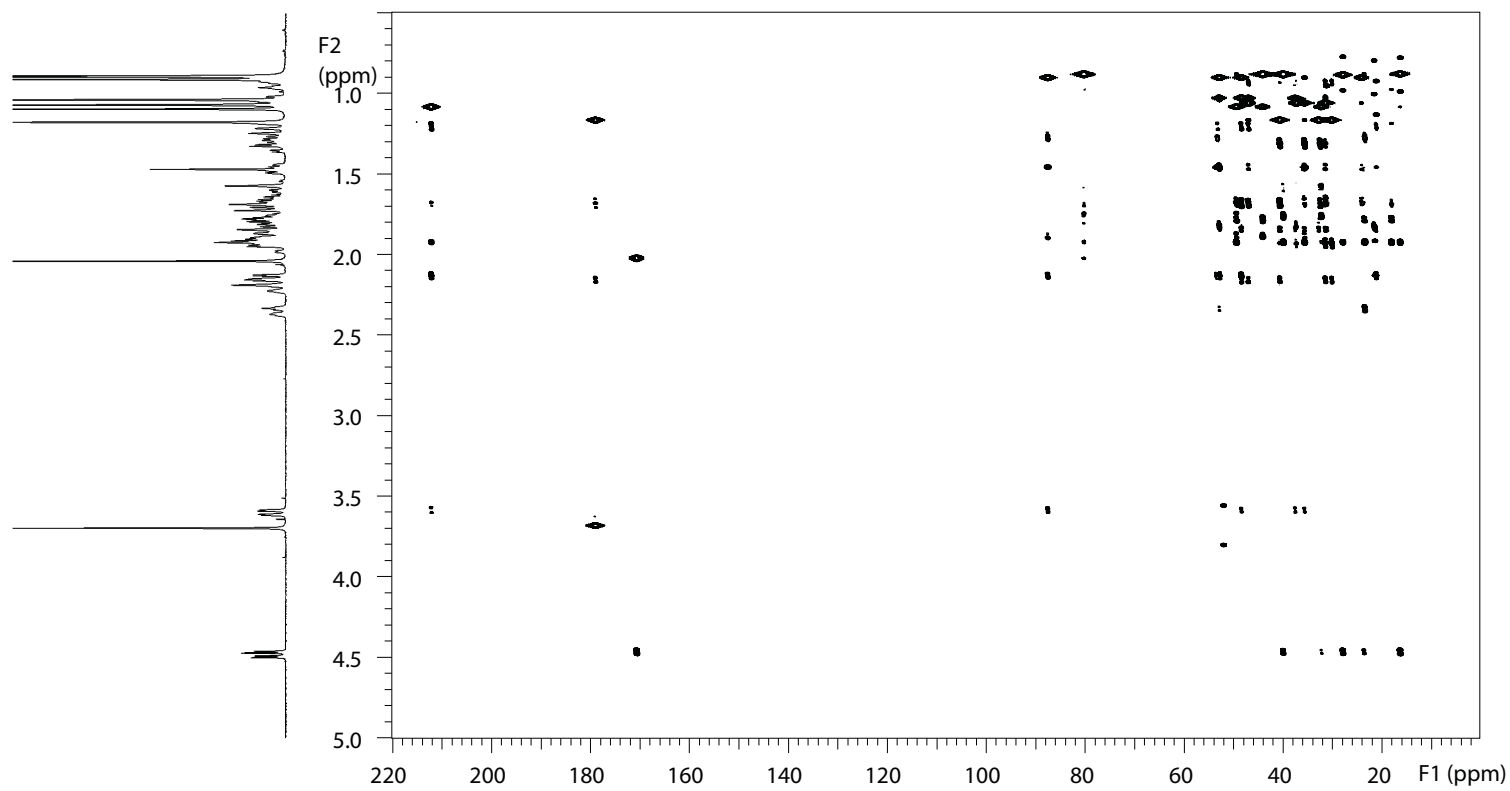

Figure S25. COSY and NOESY spectra of **9**.

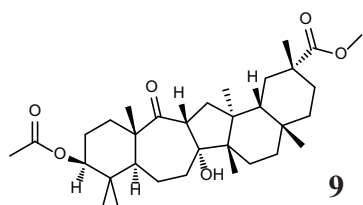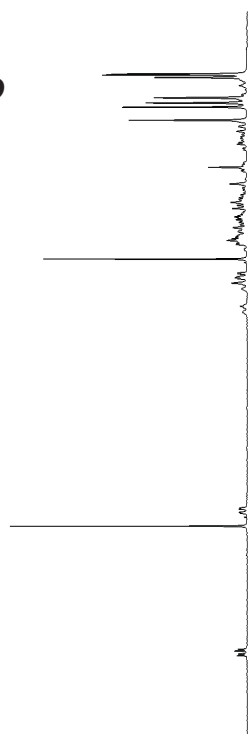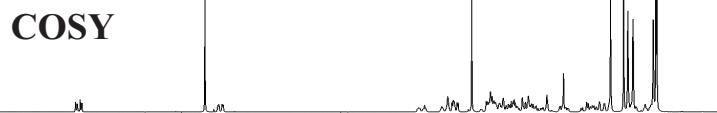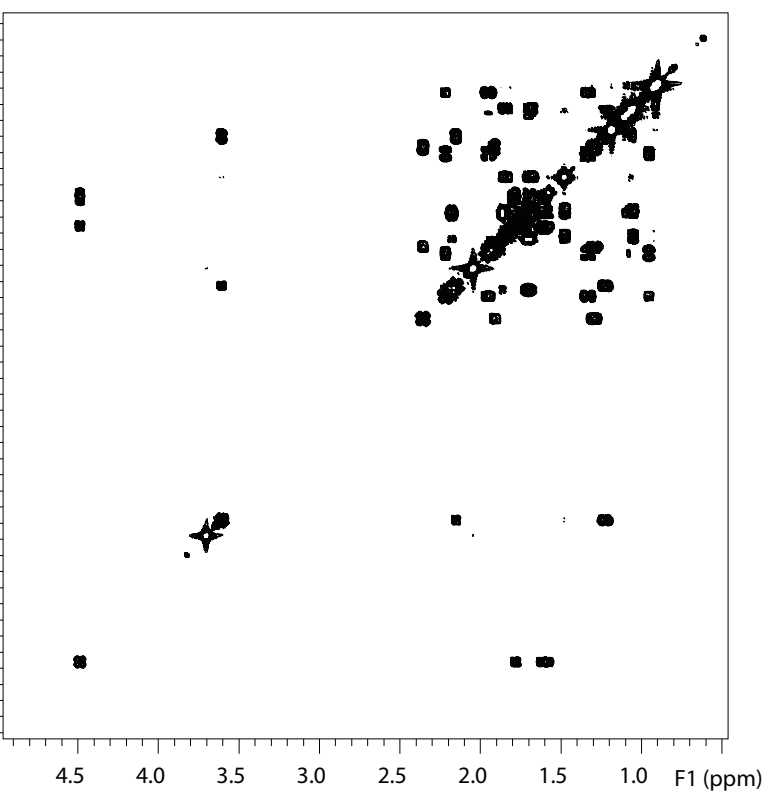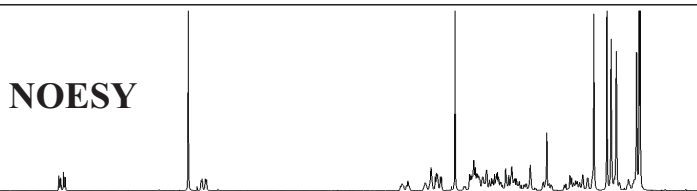

NOESY

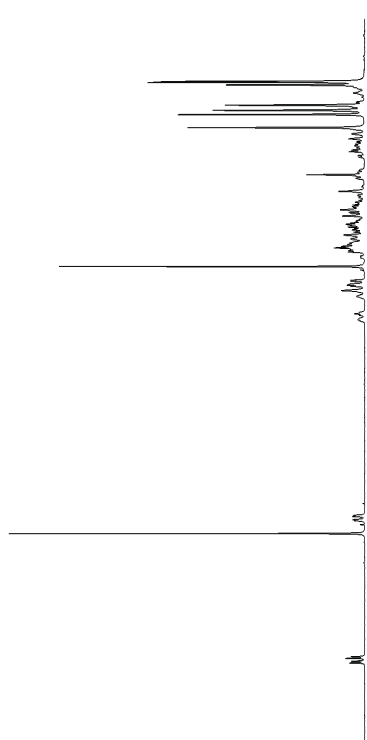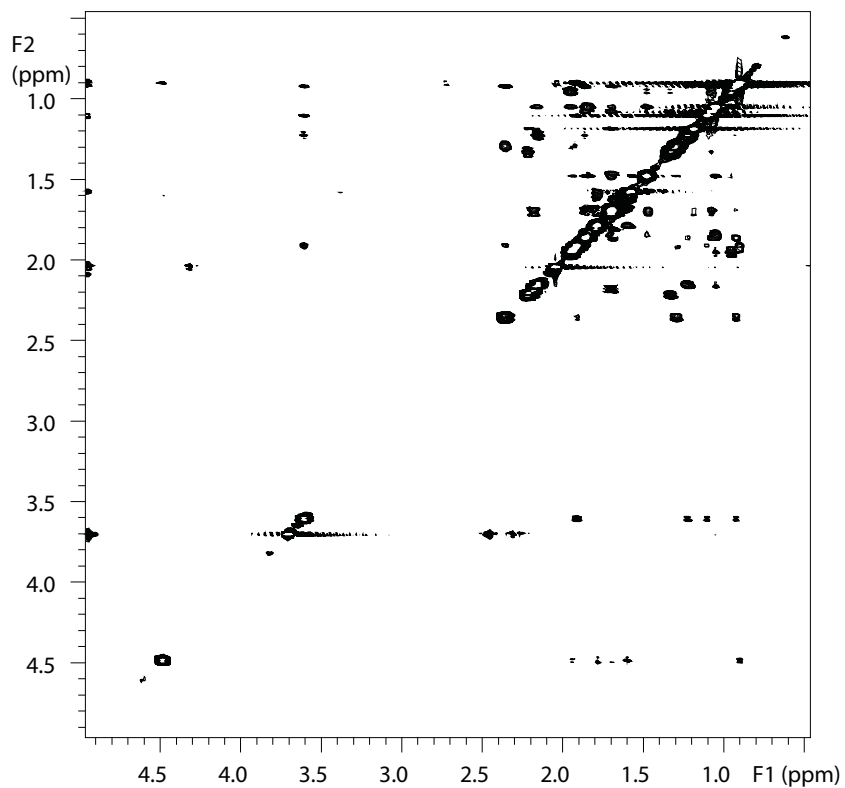



Figure S26. <sup>1</sup>H and <sup>13</sup>C spectra of 10

vai2\_18Apr2011-16:59:19

Data saved in:

chem400:/export/home/vai2/vnmrsys/data

Archive directory: /export/home/vai2/vnmrsys/data

Sample directory: vai2\_18Apr2011-16:59:19

File: PROTON

Pulse Sequence: s2pul

Solvent: CDCl<sub>3</sub>

Ambient temperature

INOVA-400 "chem400"

Relax. delay 1.000 sec

Pulse 45.0 degrees

Acq. time 3.744 sec

Width 6395.9 Hz

8 repetitions

OBSERVE H1, 399.7434710 MHz

DATA PROCESSING

FT size 65536

Total time 0 min, 38 sec

<sup>1</sup>H

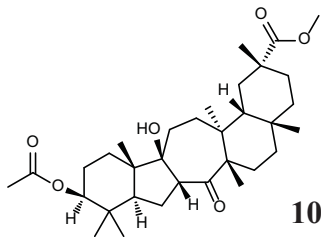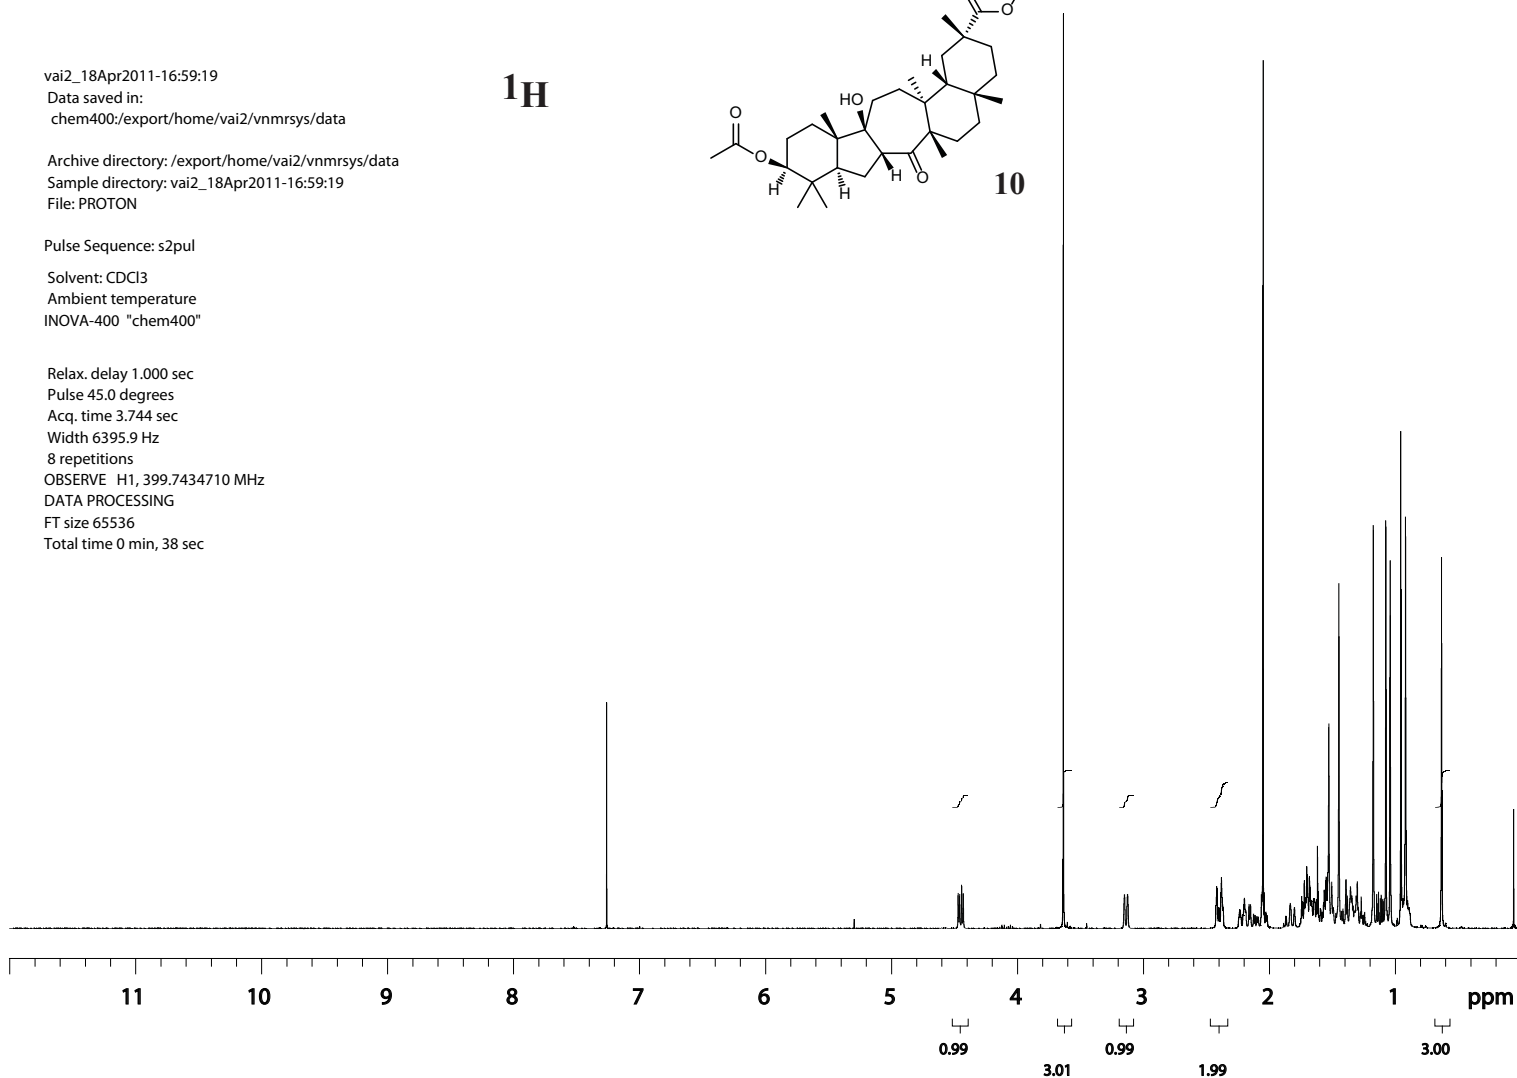

<sup>13</sup>C

Pulse Sequence: s2pul

Solvent: CDCl<sub>3</sub>

Temp. 25.0 C / 298.1 K

Pulse 58.7 degrees

Acq. time 1.300 sec

Width 40000.0 Hz

288 repetitions

OBSERVE C13, 150.8466425 MHz

DECOUPLE H1, 599.9097318 MHz

Power 42 dB

continuously on

WALTZ-16 modulated

DATA PROCESSING

Line broadening 0.5 Hz

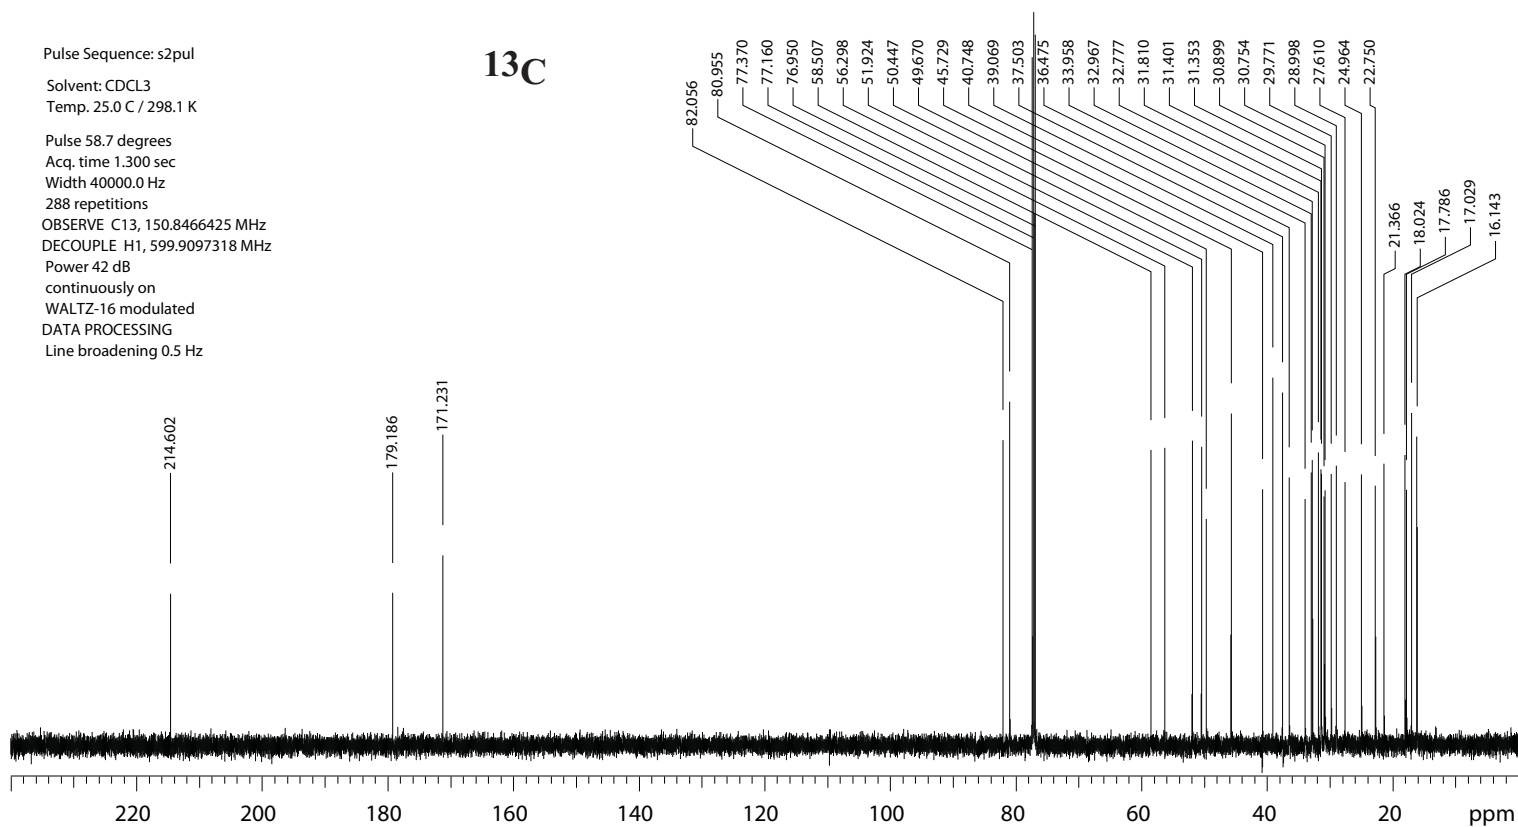

Figure S27. HMQC and HMBC spectra of **10**.

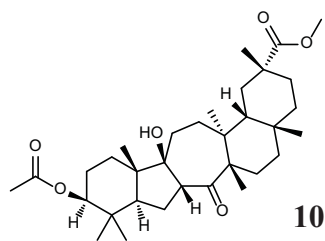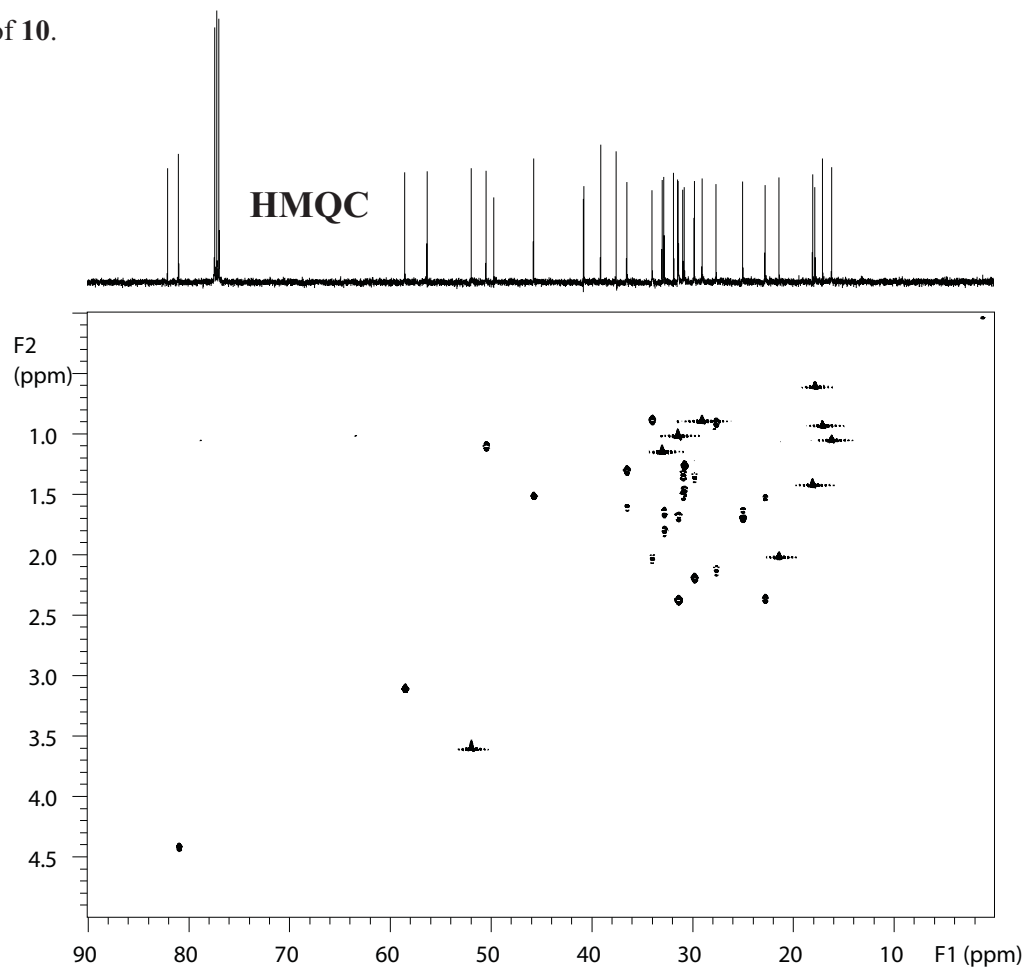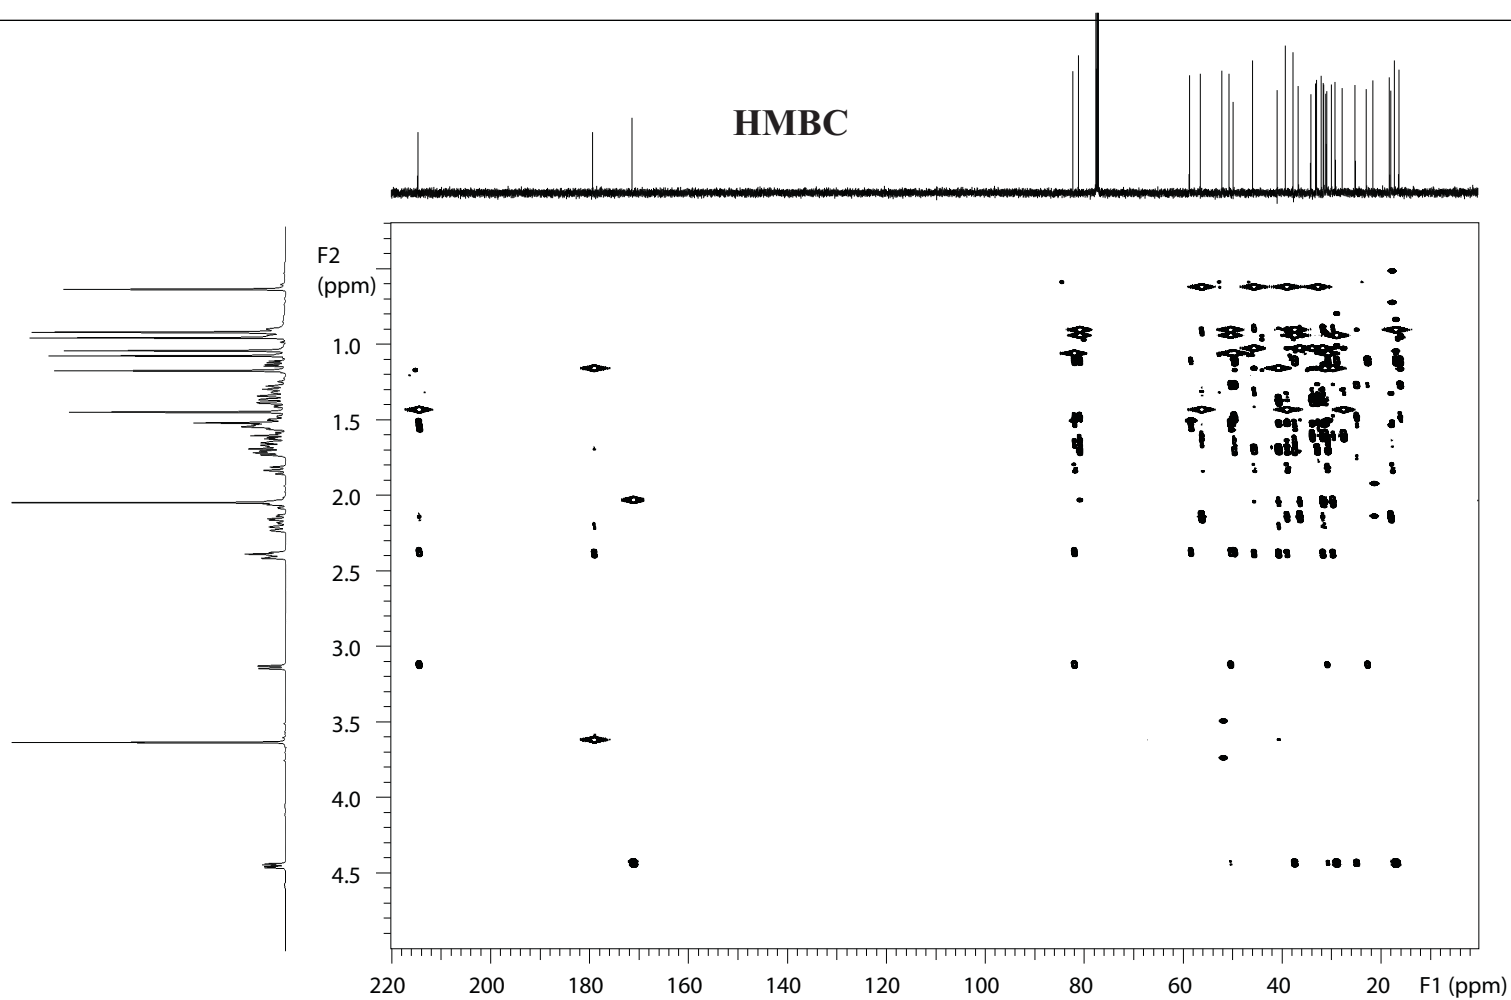

Figure S28. COSY and NOESY spectra of **10**.

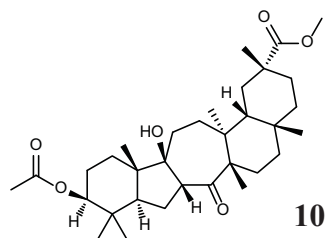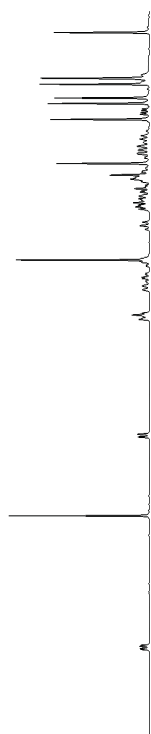

COSY

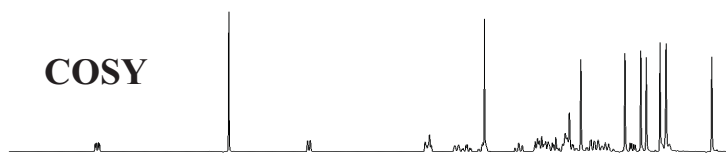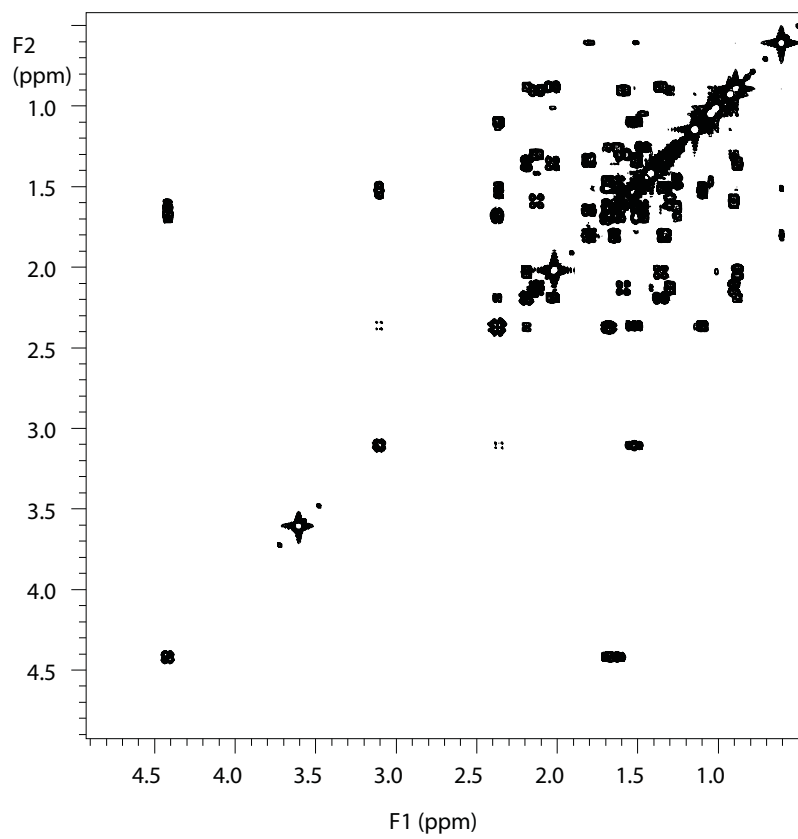

NOESY

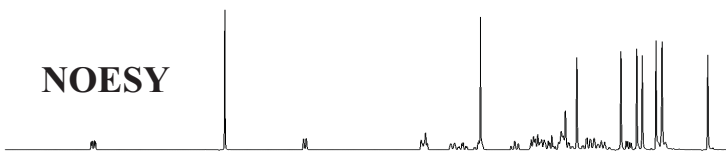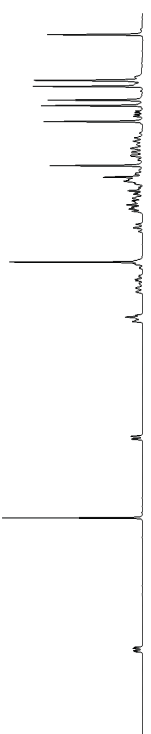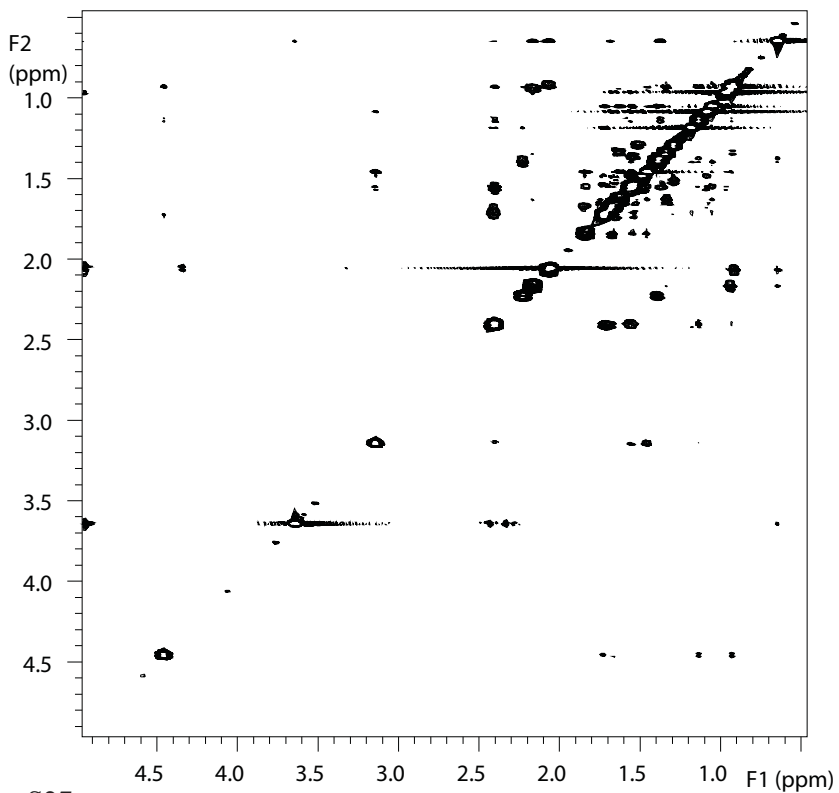

Figure S29. <sup>1</sup>H and <sup>13</sup>C spectra of 12

STANDARD PROTON PARAMETERS

Pulse Sequence: s2pul  
Solvent: CDCl<sub>3</sub>  
Temp. 25.0 C / 298.1 K  
File: H1  
INOVA-500 "joe"

Pulse 75.7 degrees  
Acq. time 3.500 sec  
Width 8000.0 Hz  
16 repetitions  
OBSERVE H1, 599.9067207 MHz  
DATA PROCESSING  
FT size 65536  
Total time 0 min, 56 sec

<sup>1</sup>H

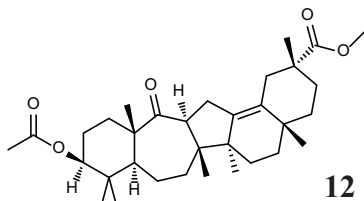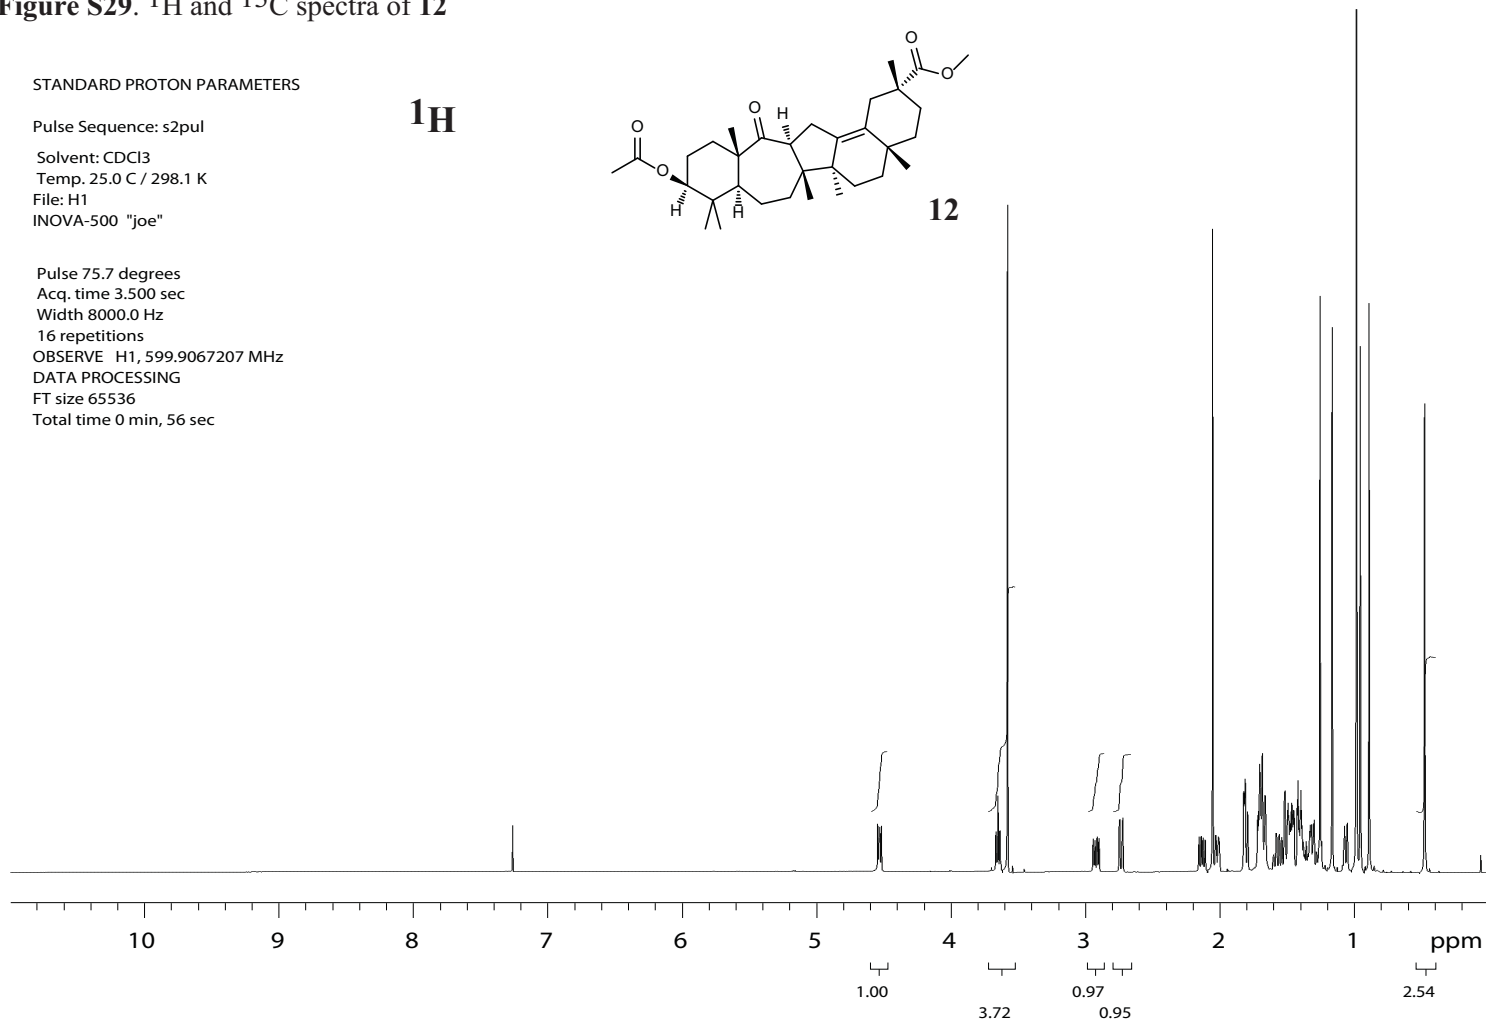

Pulse Sequence: s2pul

Solvent: CDCl<sub>3</sub>  
Temp. 25.0 C / 298.1 K  
User: 1-14-87  
File: C13  
INOVA-500 "joe"

Pulse 58.7 degrees  
Acq. time 1.300 sec  
Width 40000.0 Hz  
768 repetitions  
OBSERVE C13, 150.8466318 MHz  
DECOUPLE H1, 599.9097318 MHz  
Power 42 dB  
continuously on  
WALTZ-16 modulated  
DATA PROCESSING  
Line broadening 0.5 Hz  
FT size 131072  
Total time 44 min, 41 sec

<sup>13</sup>C

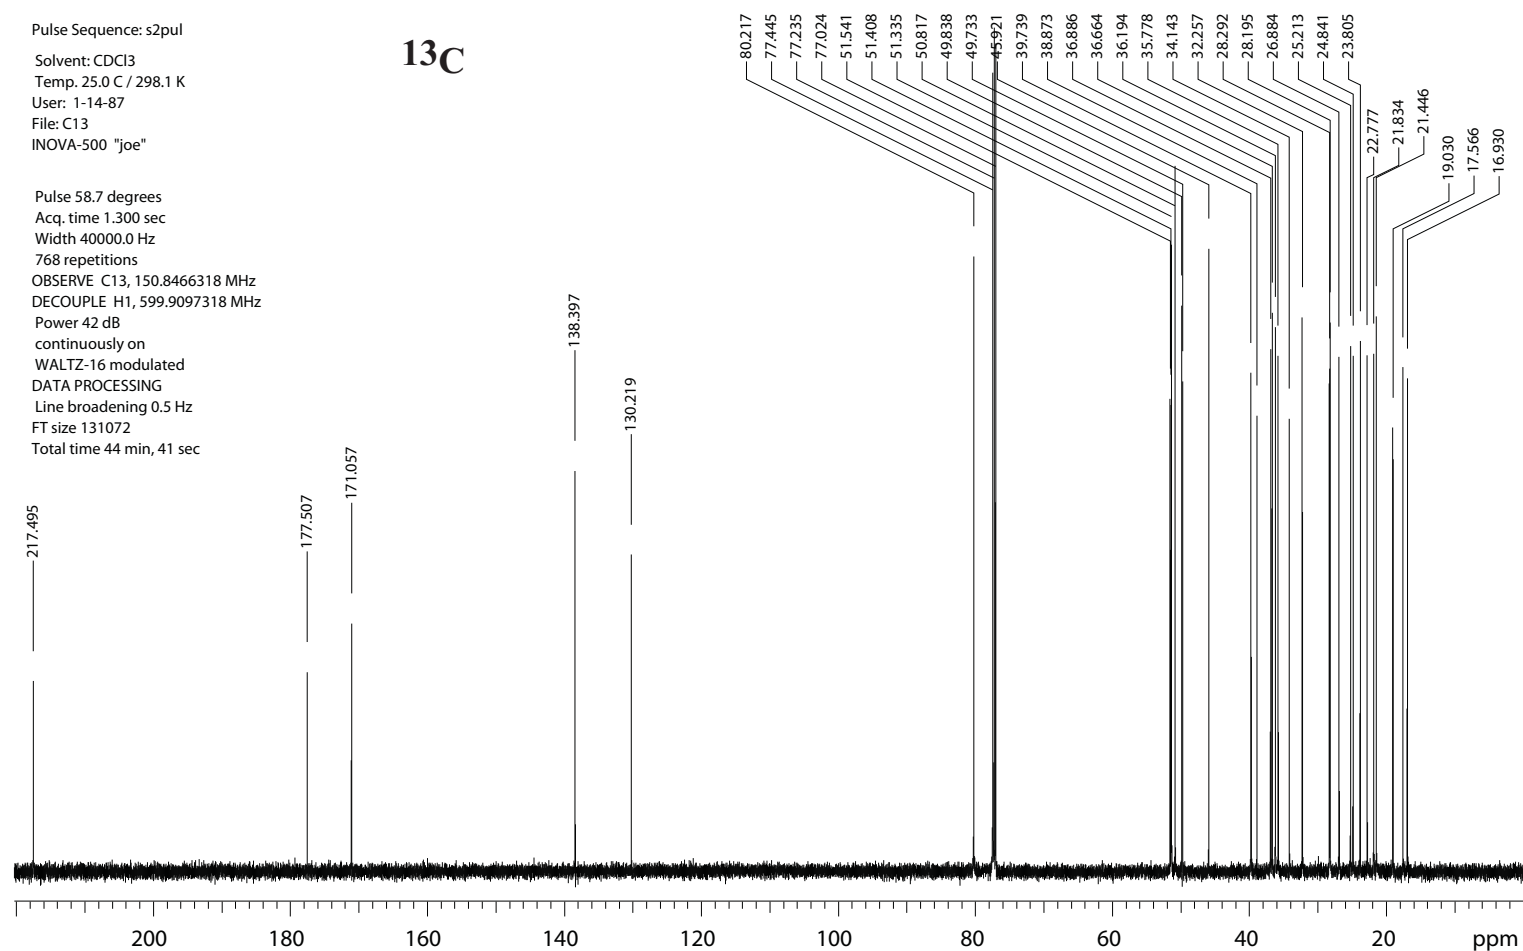

Figure S30. HMQC and HMBC spectra of 12.

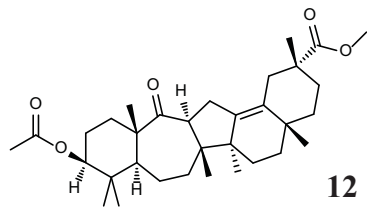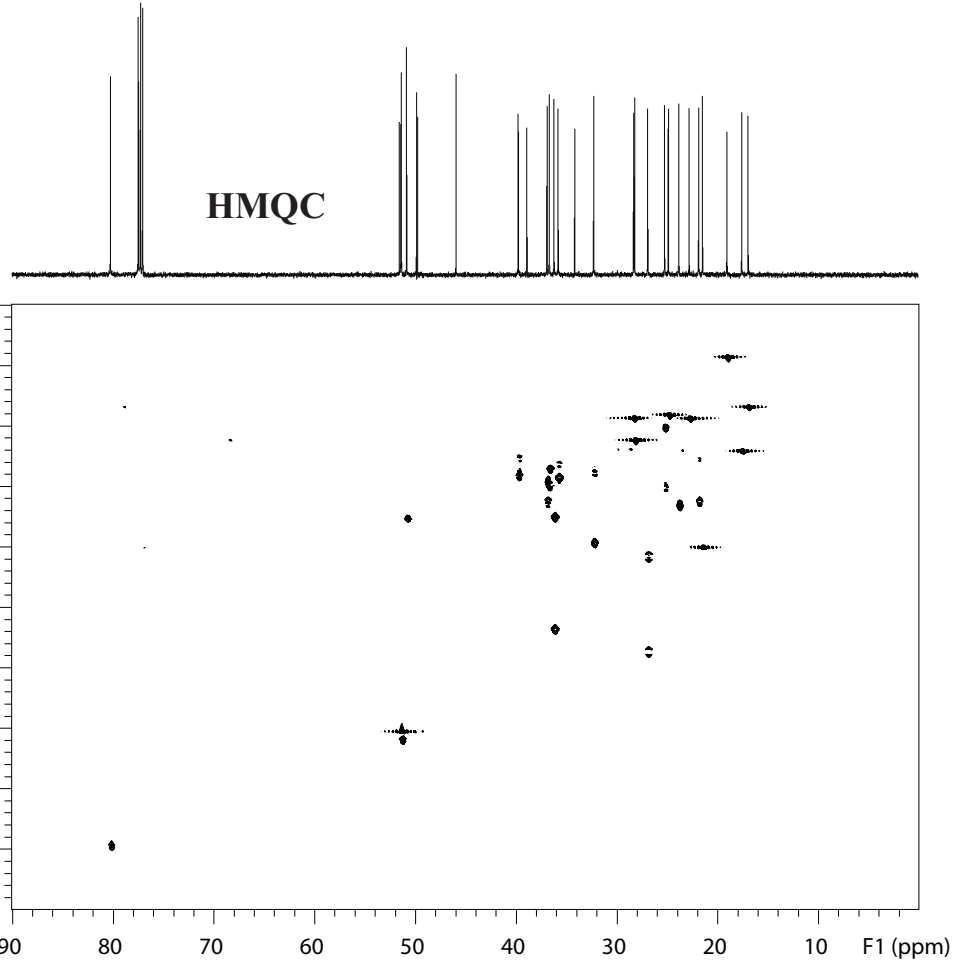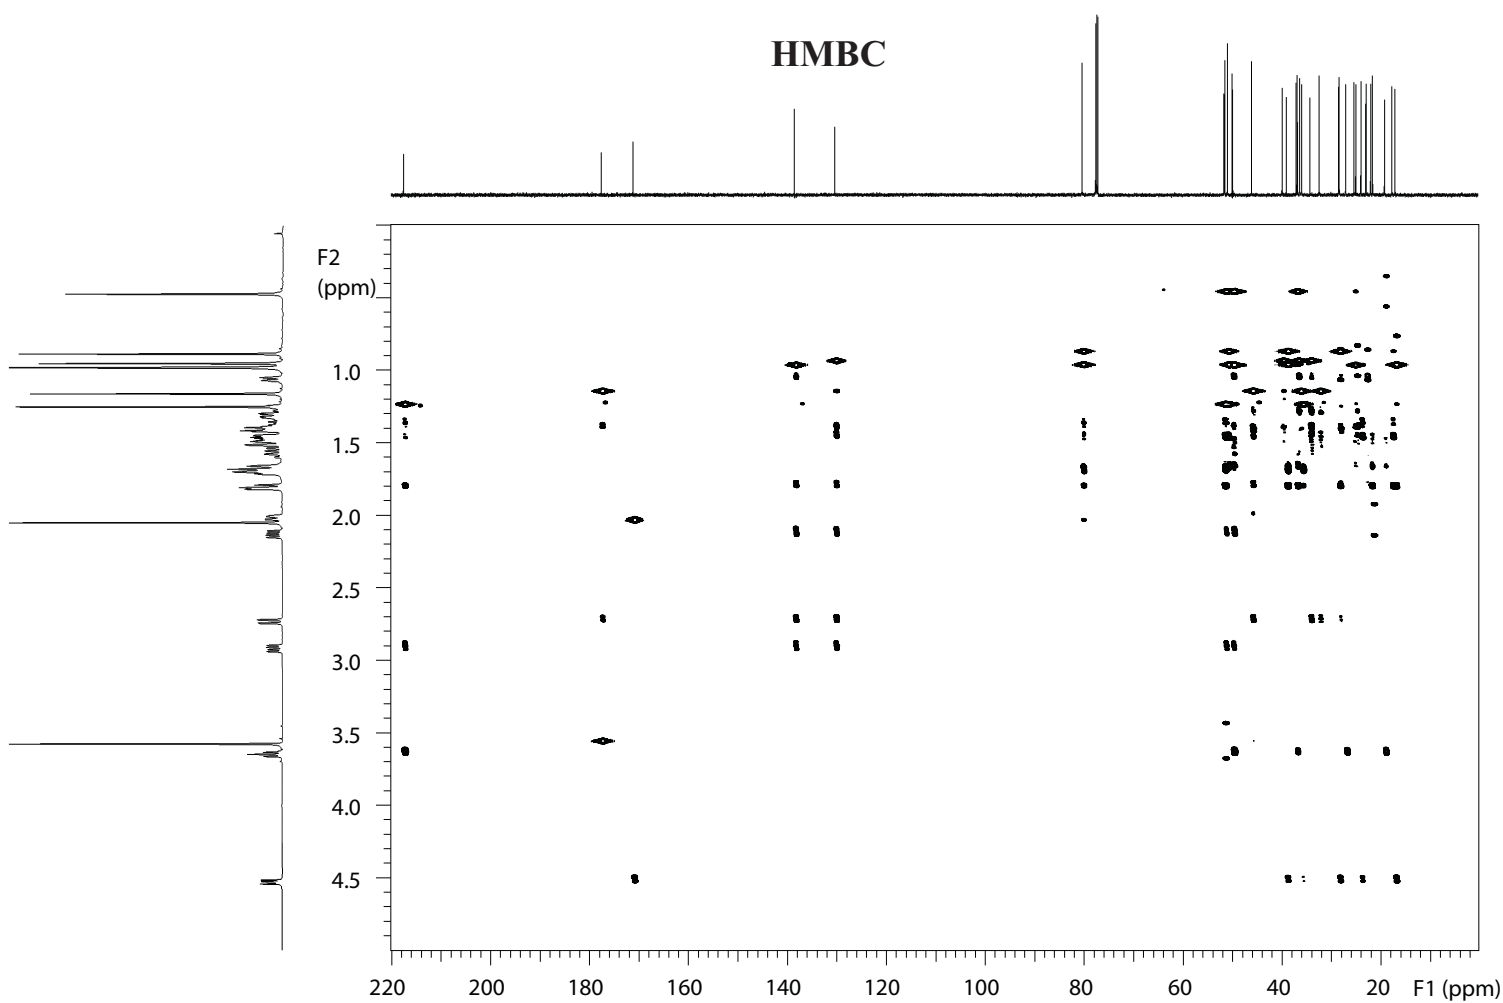

Figure S31. COSY and NOESY spectra of 12.

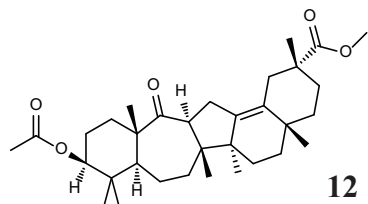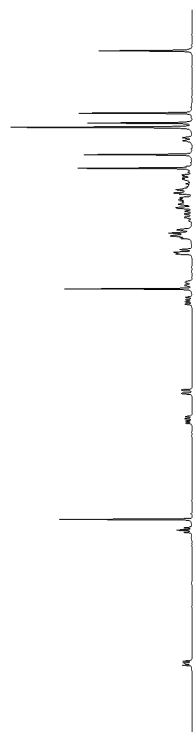

**COSY**

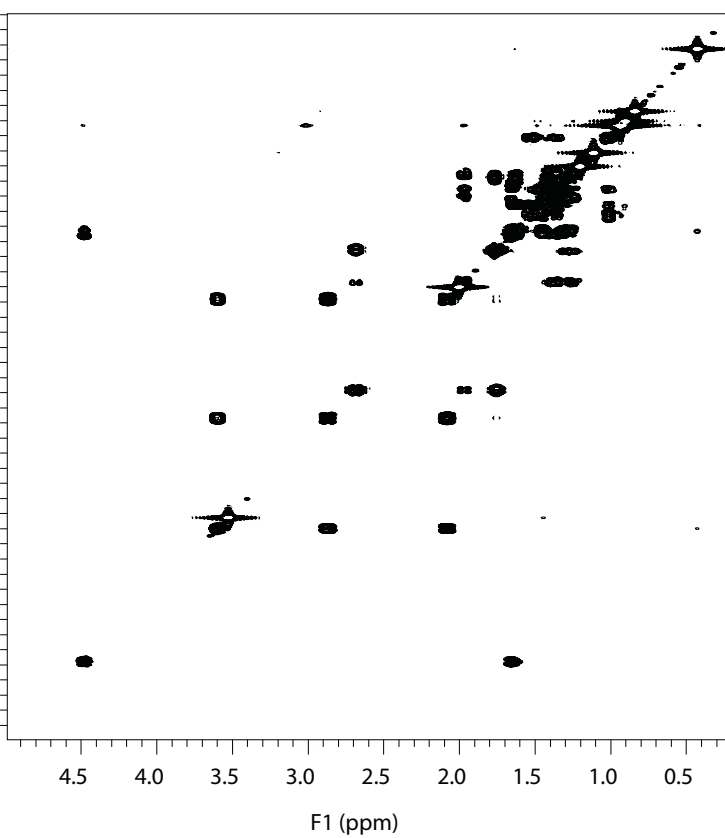

**NOESY**

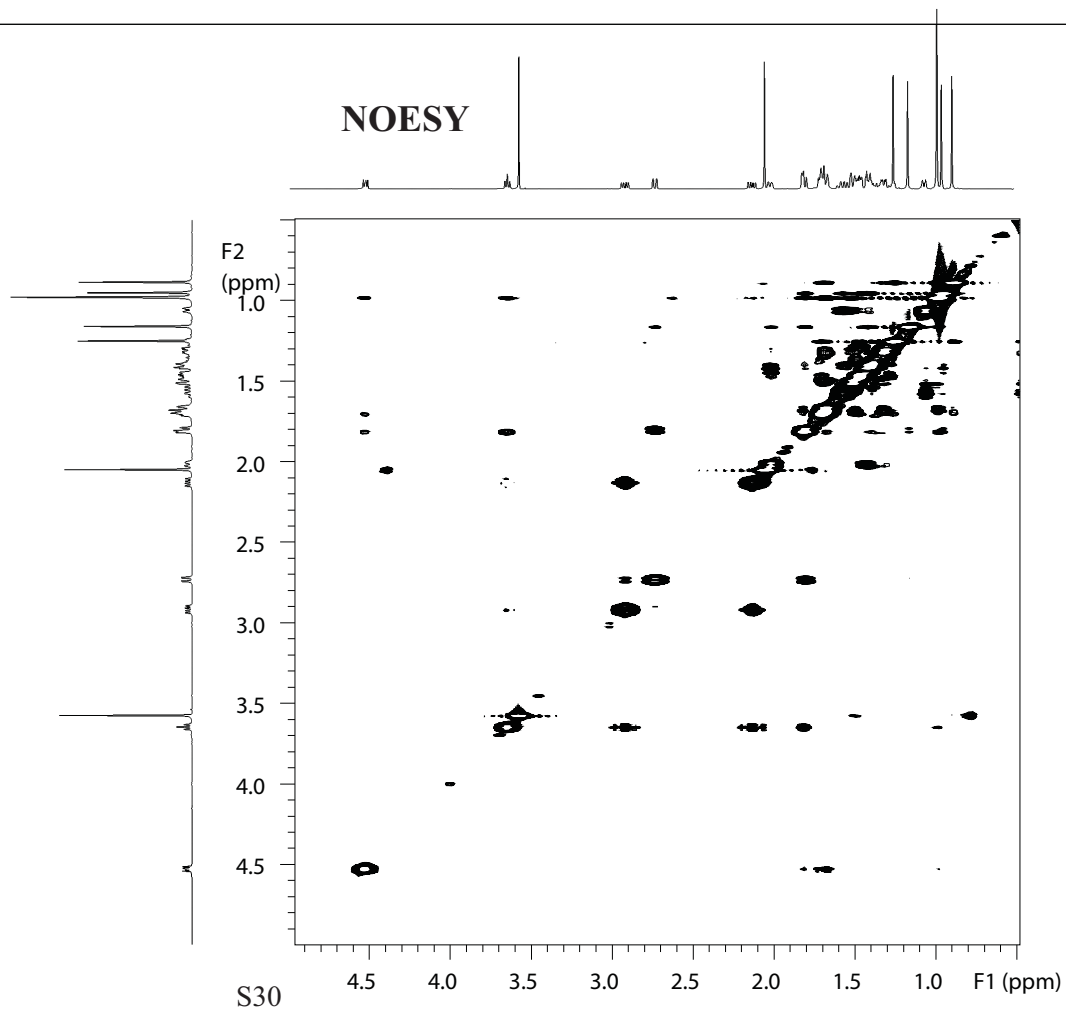

Figure S32. <sup>1</sup>H and <sup>13</sup>C spectra of 13

STANDARD PROTON PARAMETERS

Pulse Sequence: s2pul  
Solvent: CDCl<sub>3</sub>  
Temp. 25.0 C / 298.1 K  
File: H1  
INOVA-500 "joe"

Pulse 75.7 degrees  
Acq. time 3.500 sec  
Width 8000.0 Hz  
16 repetitions  
OBSERVE H1, 599.9067200 MHz  
DATA PROCESSING  
FT size 65536  
Total time 0 min, 56 sec

<sup>1</sup>H

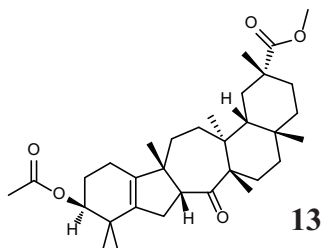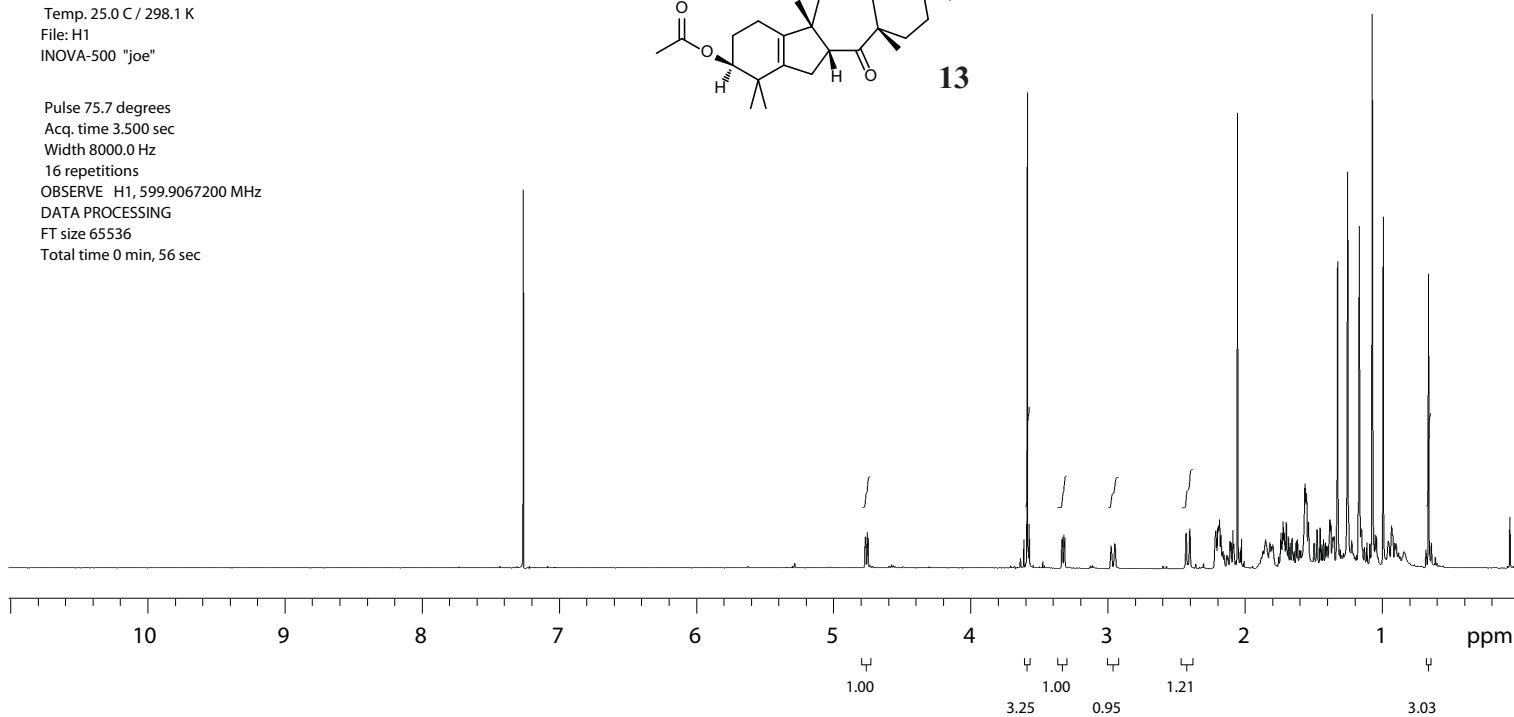

STANDARD CARBON PARAMETERS

Pulse Sequence: s2pul  
Solvent: CDCl<sub>3</sub>  
Temp. 25.0 C / 298.1 K  
User: 1-14-87  
File: C13  
INOVA-500 "joe"

Pulse 58.7 degrees  
Acq. time 1.300 sec  
Width 40000.0 Hz  
2048 repetitions  
OBSERVE C13, 150.8466406 MHz  
DECOUPLE H1, 599.9097318 MHz  
Power 42 dB  
continuously on  
WALTZ-16 modulated  
DATA PROCESSING  
Line broadening 0.5 Hz  
FT size 131072  
Total time 44 min, 41 sec

<sup>13</sup>C

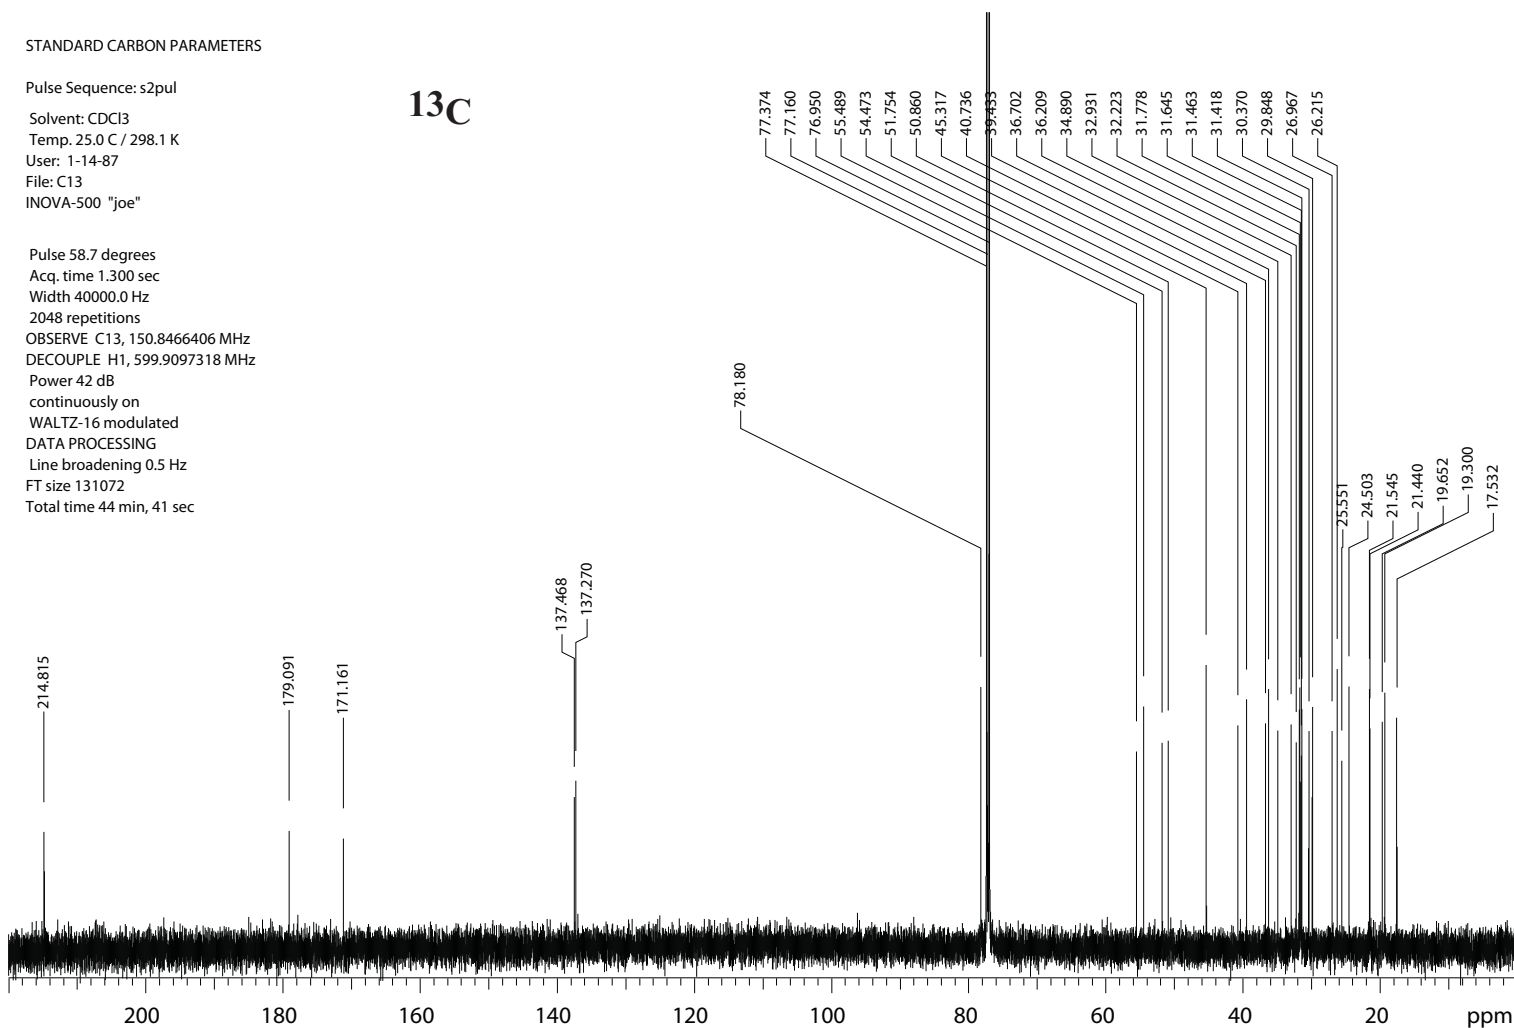

Figure S33. HMQC and HMBC spectra of 13.

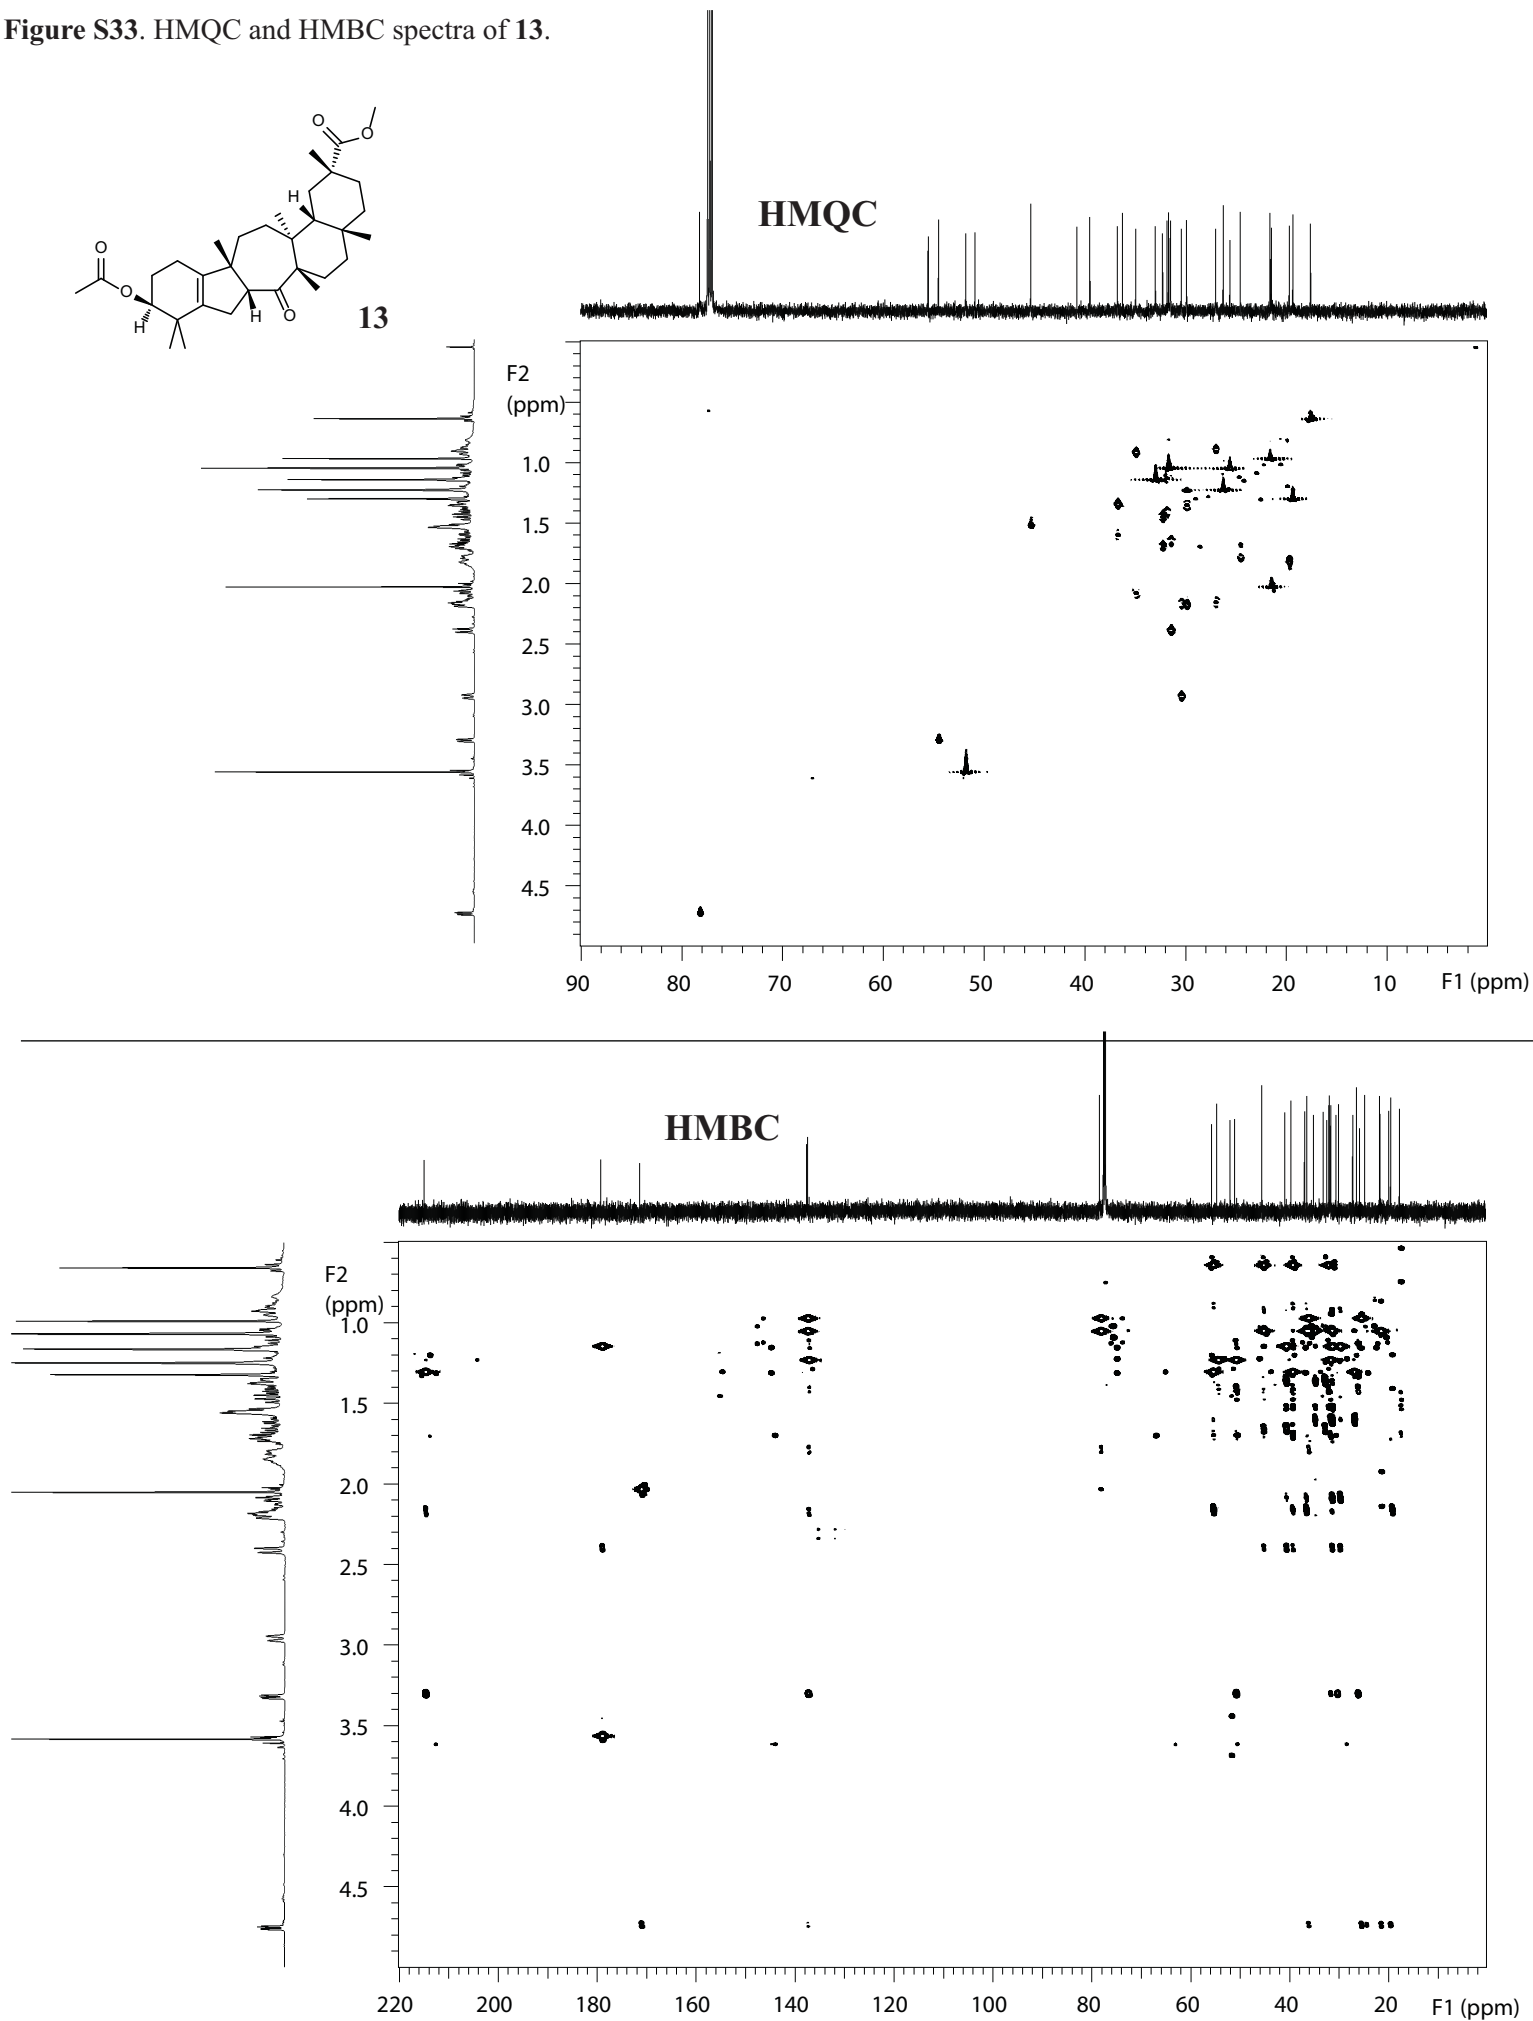



Figure S34. COSY and NOESY spectra of 13.

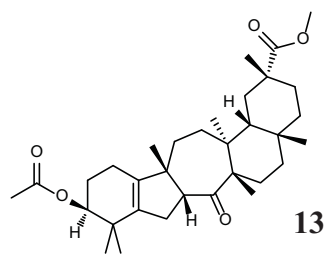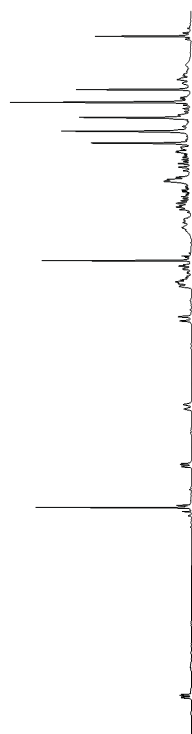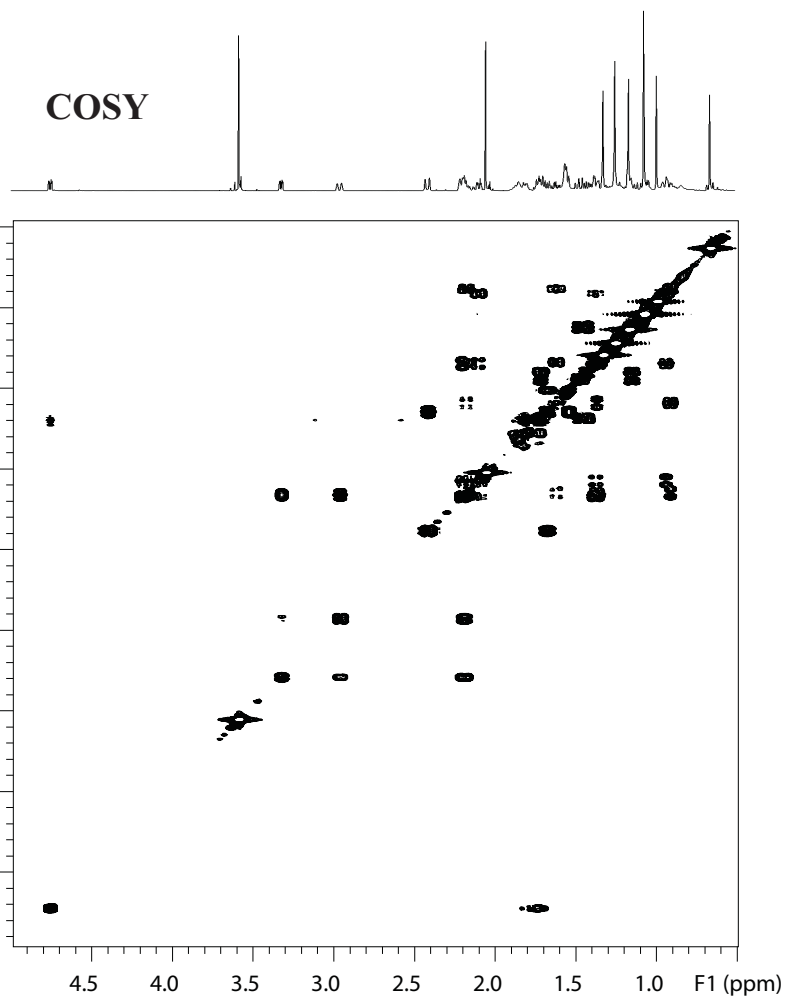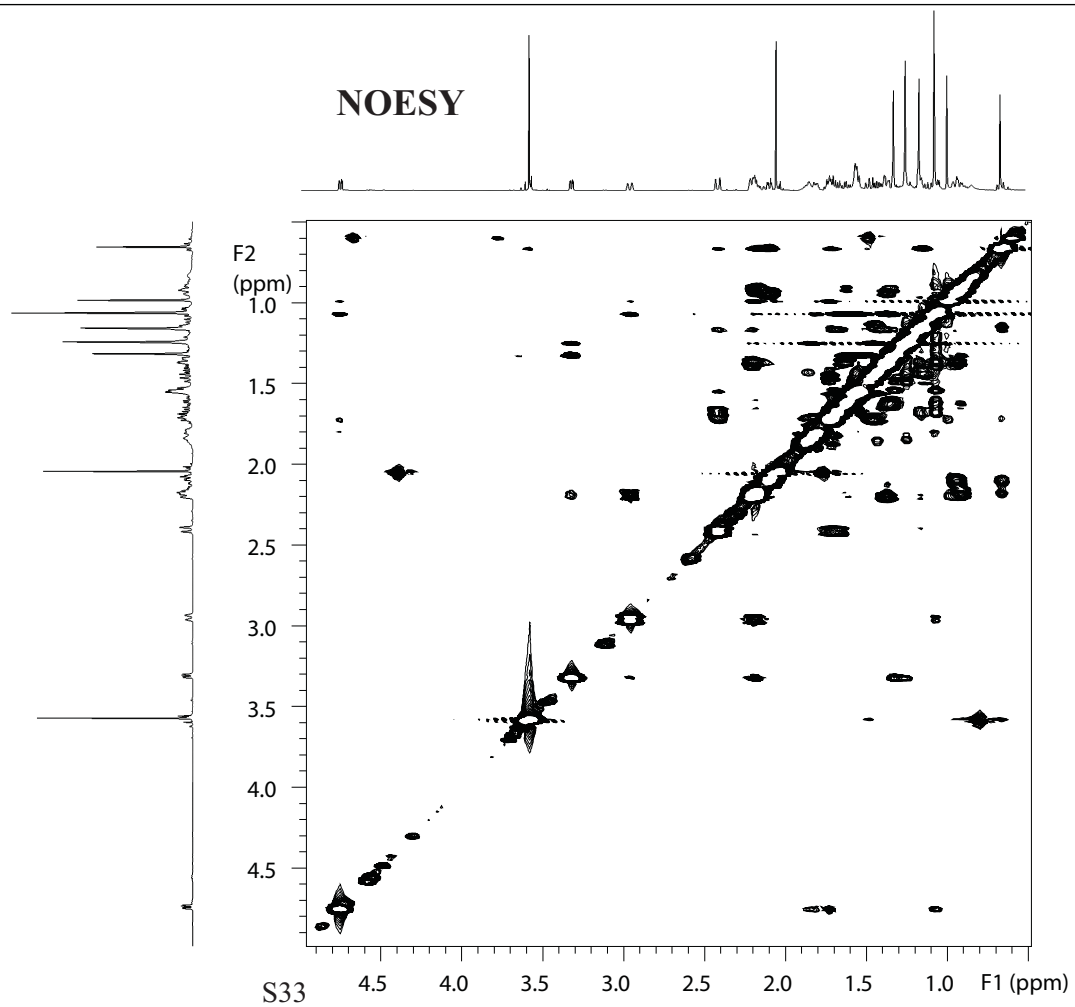

Figure S35.  $^1\text{H}$  and  $^{13}\text{C}$  spectra of 14

STANDARD PROTON PARAMETERS

Pulse Sequence: s2pul

Solvent:  $\text{CDCl}_3$   
Temp. 25.0 C / 298.1 K  
File: H1  
INOVA-500 "joe"

Pulse 75.7 degrees  
Acq. time 3.500 sec  
Width 8000.0 Hz  
16 repetitions  
OBSERVE H1, 599.9067214 MHz  
DATA PROCESSING  
FT size 65536  
Total time 0 min, 56 sec

$^1\text{H}$

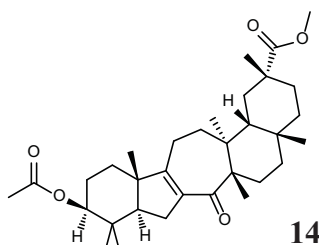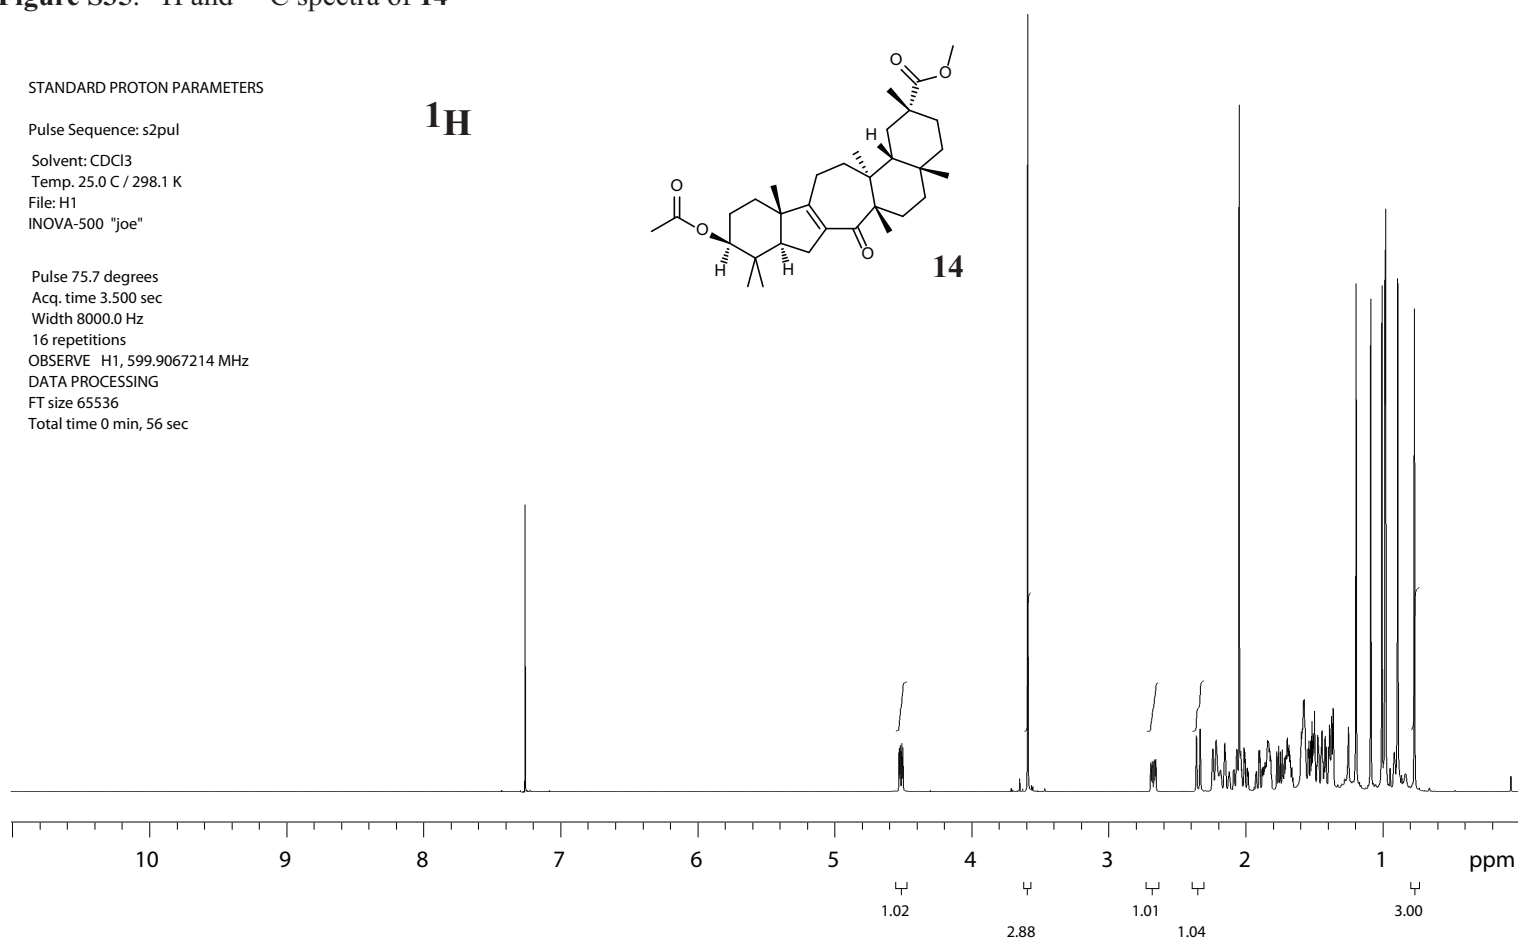

STANDARD CARBON PARAMETERS

Pulse Sequence: s2pul

Solvent:  $\text{CDCl}_3$   
Temp. 25.0 C / 298.1 K  
User: 1-14-87  
File: C13  
INOVA-500 "joe"

Pulse 58.7 degrees  
Acq. time 1.300 sec  
Width 40000.0 Hz  
1216 repetitions  
OBSERVE C13, 150.8466412 MHz  
DECOUPLE H1, 599.9097318 MHz  
Power 42 dB  
continuously on  
WALTZ-16 modulated  
DATA PROCESSING  
Line broadening 0.5 Hz  
FT size 131072  
Total time 44 min, 41 sec

$^{13}\text{C}$

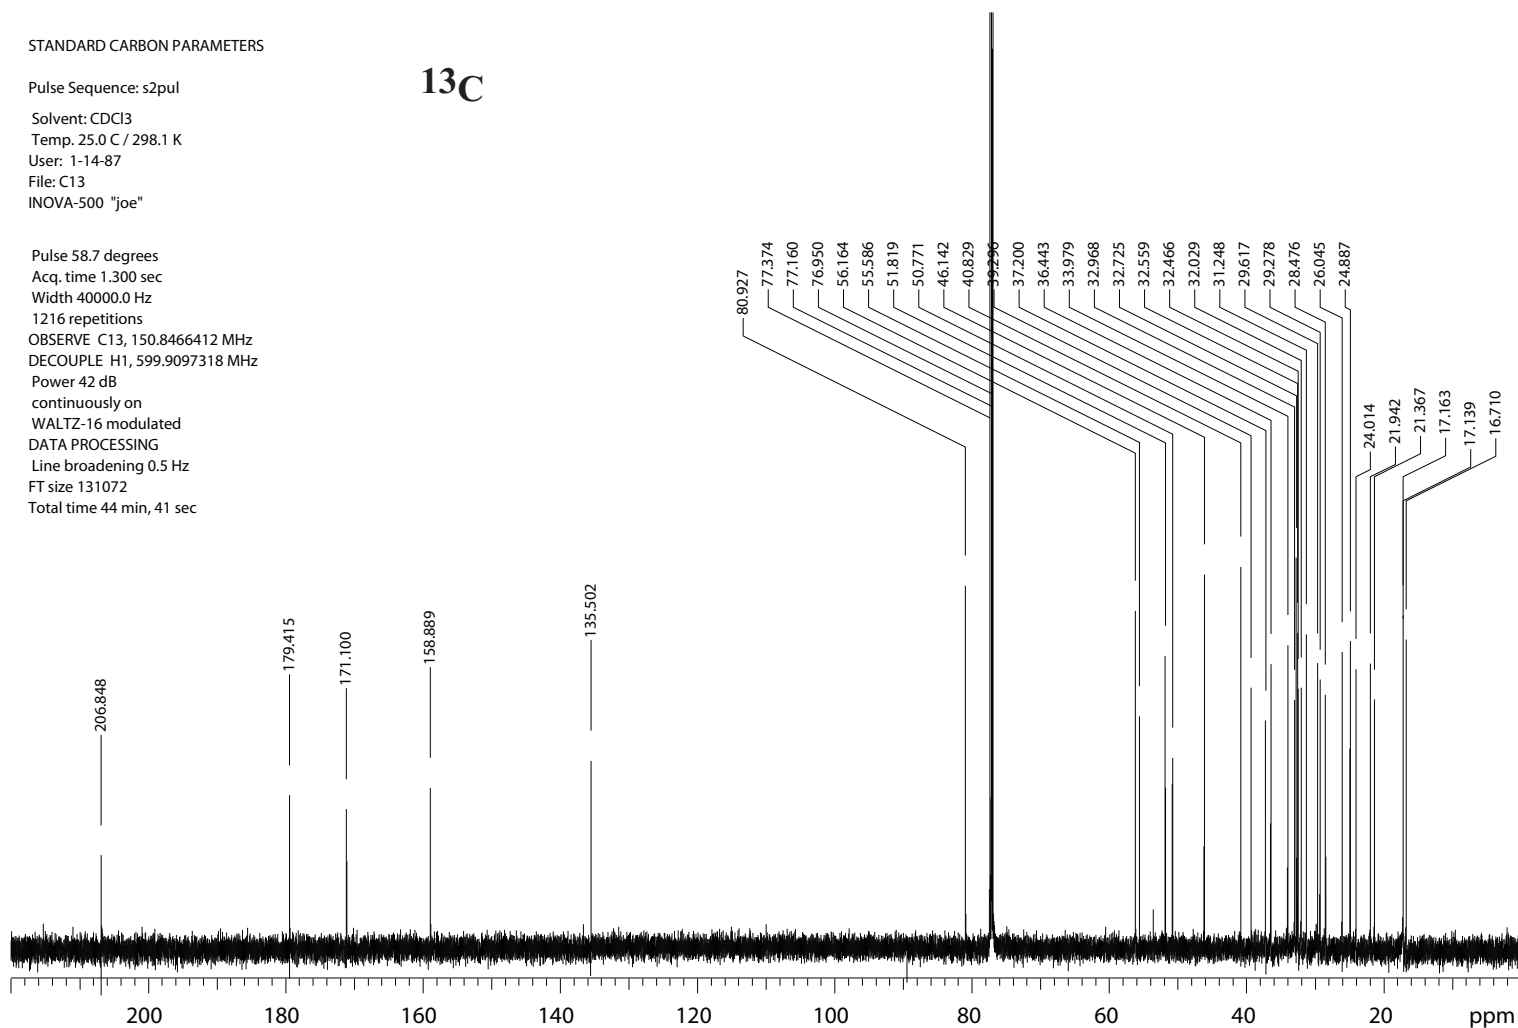

Figure S36. HMQC and HMBC spectra of 14.

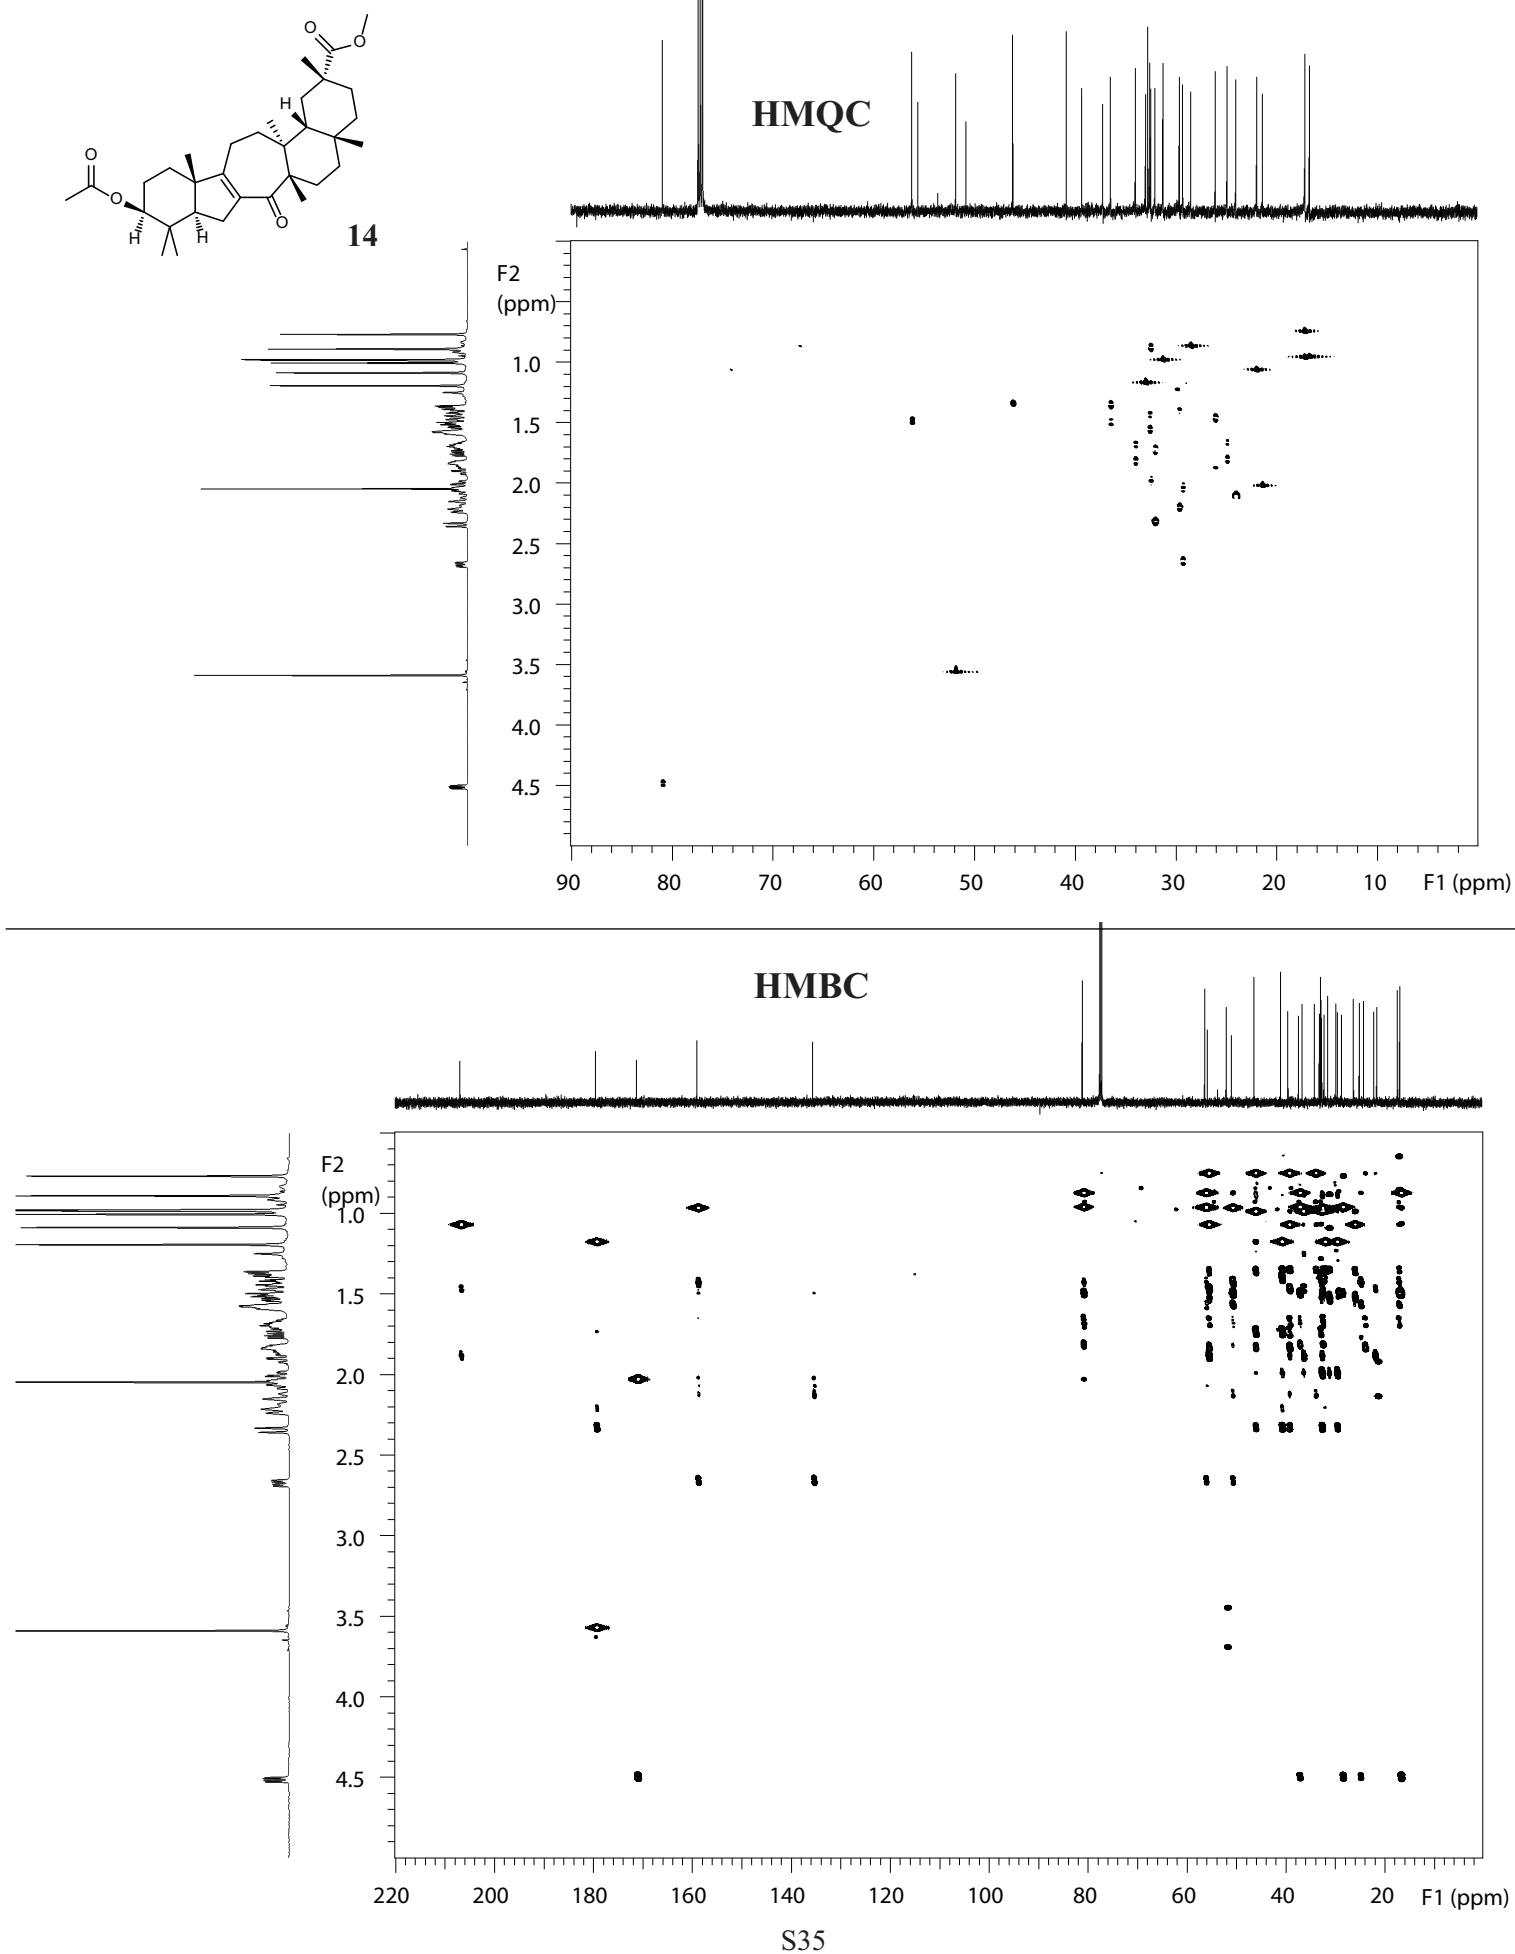

Figure S37. <sup>1</sup>H and <sup>13</sup>C spectra of 15

vai2\_15Dec2010-12:03:37

Data saved in:  
chem400:/export/home/vai2/vnmrsys/data

Archive directory: /export/home/vai2/vnmrsys/data  
Sample directory: vai2\_15Dec2010-12:03:37

Pulse Sequence: s2pul

Solvent: CDCl<sub>3</sub>  
Ambient temperature  
File: VAI2\_100  
INOVA-500 "joe"

Relax. delay 1.000 sec  
Pulse 45.0 degrees  
Acq. time 3.744 sec  
Width 6395.9 Hz  
8 repetitions  
OBSERVE H1, 399.7434712 MHz  
DATA PROCESSING  
FT size 65536  
Total time 0 min, 38 sec

<sup>1</sup>H

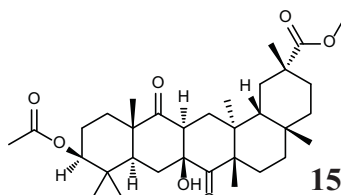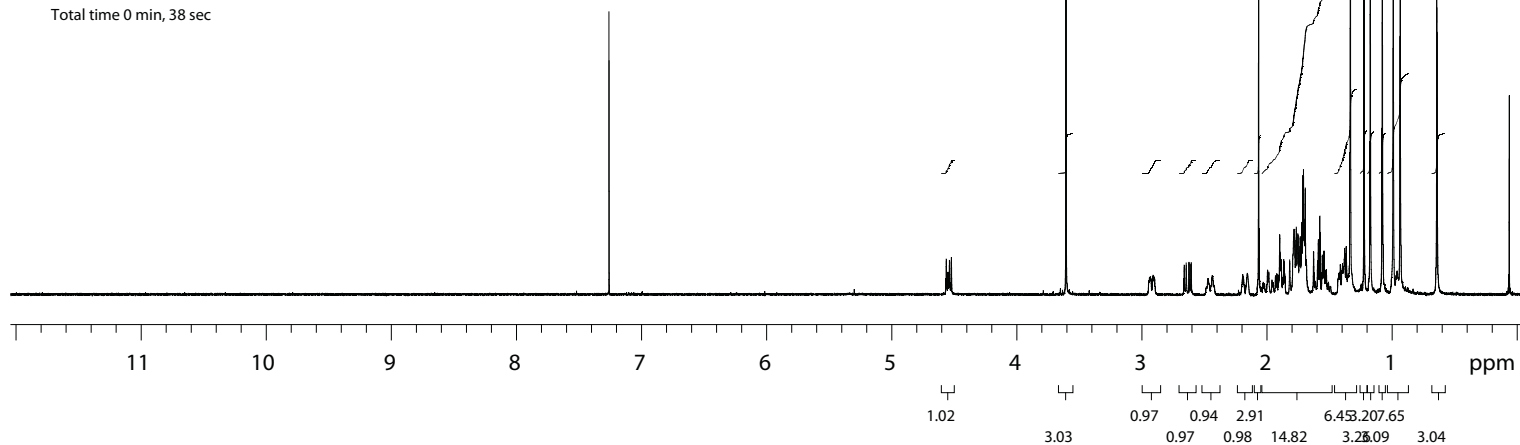

Sample 101

Pulse Sequence: s2pul

Solvent: CDCl<sub>3</sub>  
Temp. 25.0 C / 298.1 K  
User: 1-14-87  
File: VAI2\_098  
INOVA-500 "joe"

Pulse 58.7 degrees  
Acq. time 1.300 sec  
Width 40000.0 Hz  
896 repetitions  
OBSERVE C13, 150.8466447 MHz  
DECOUPLE H1, 599.9097318 MHz  
Power 42 dB  
continuously on  
WALTZ-16 modulated  
DATA PROCESSING  
Line broadening 0.5 Hz

<sup>13</sup>C

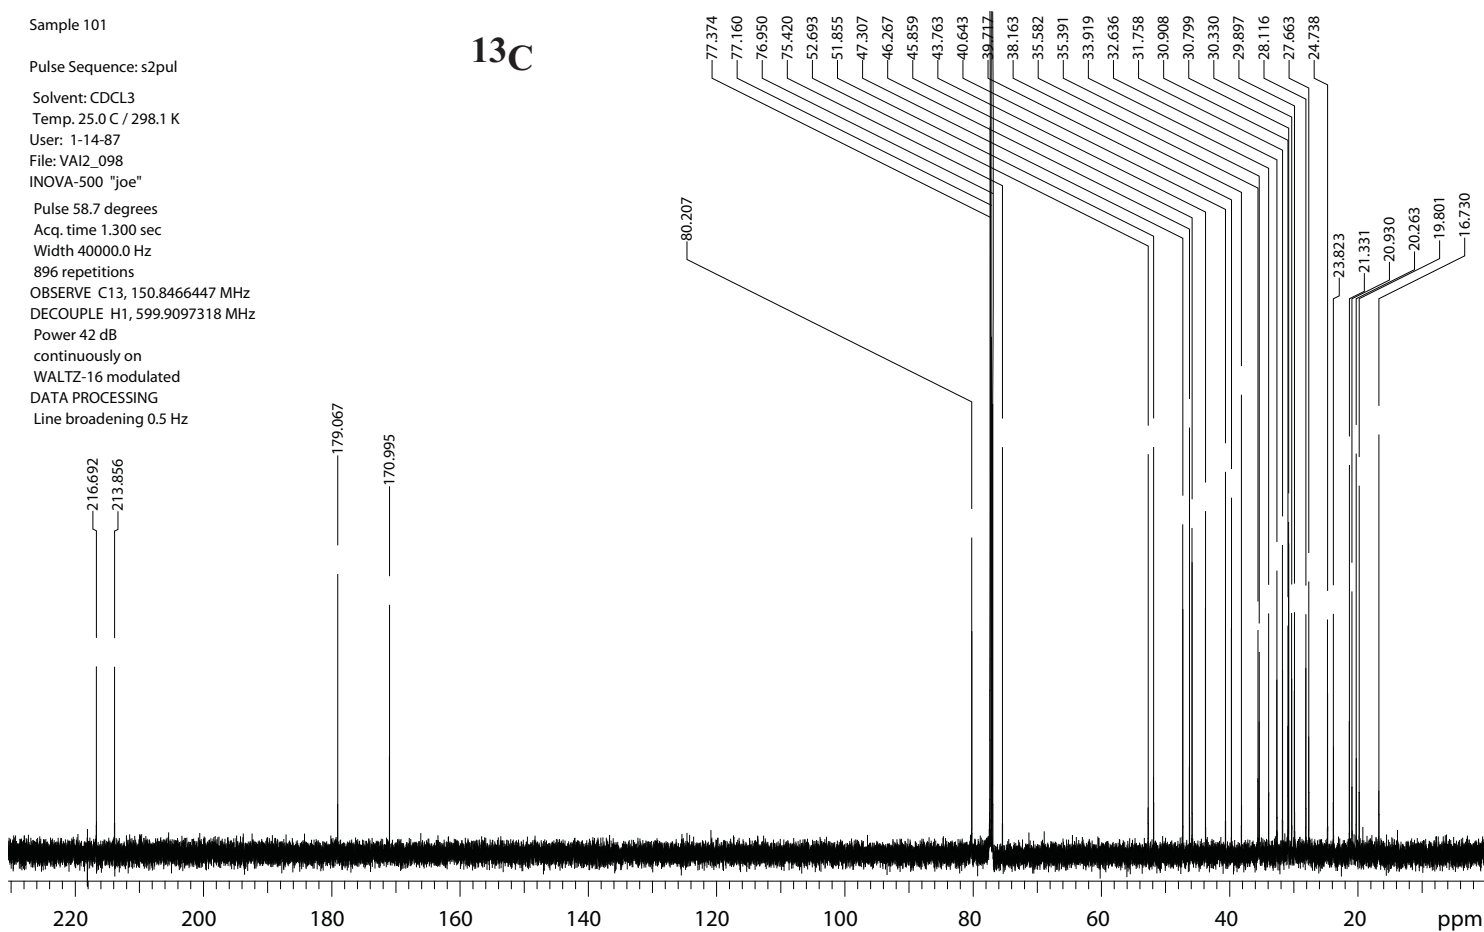

Figure S38. HMQC and HMBC spectra of 15.

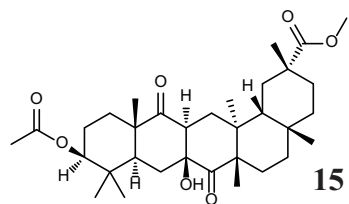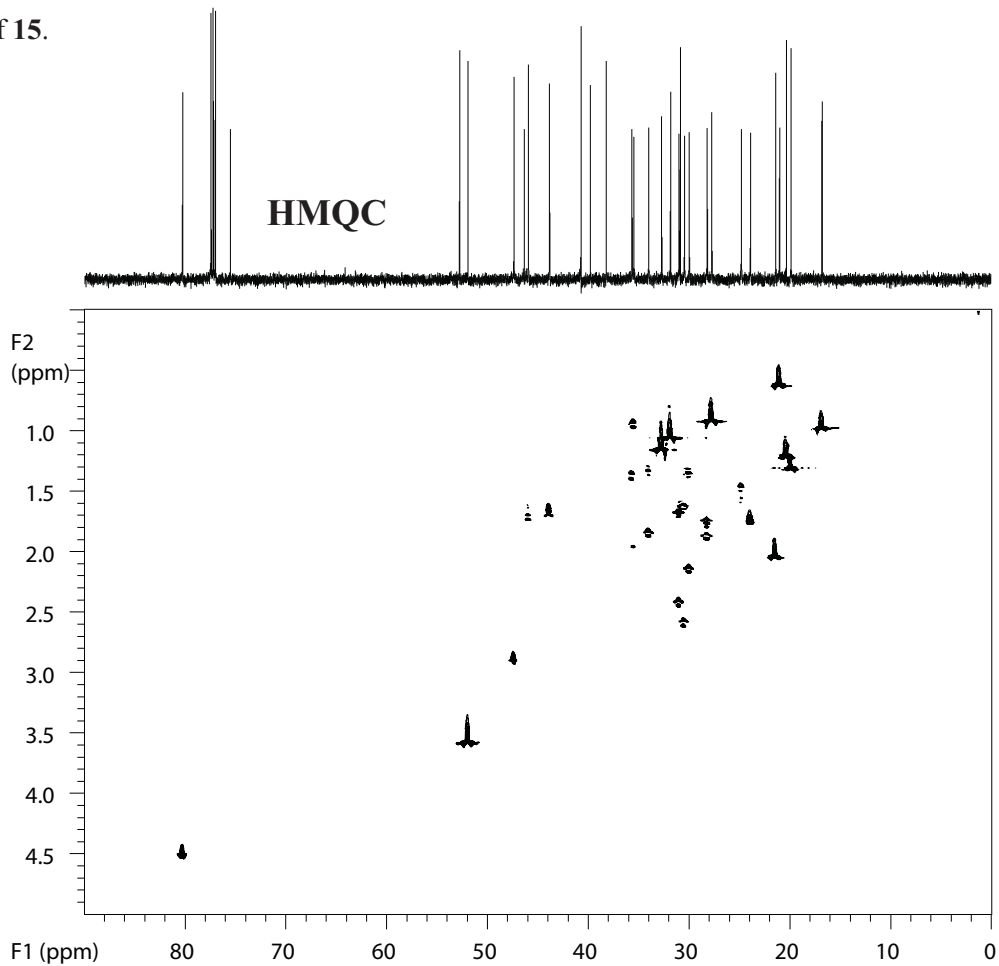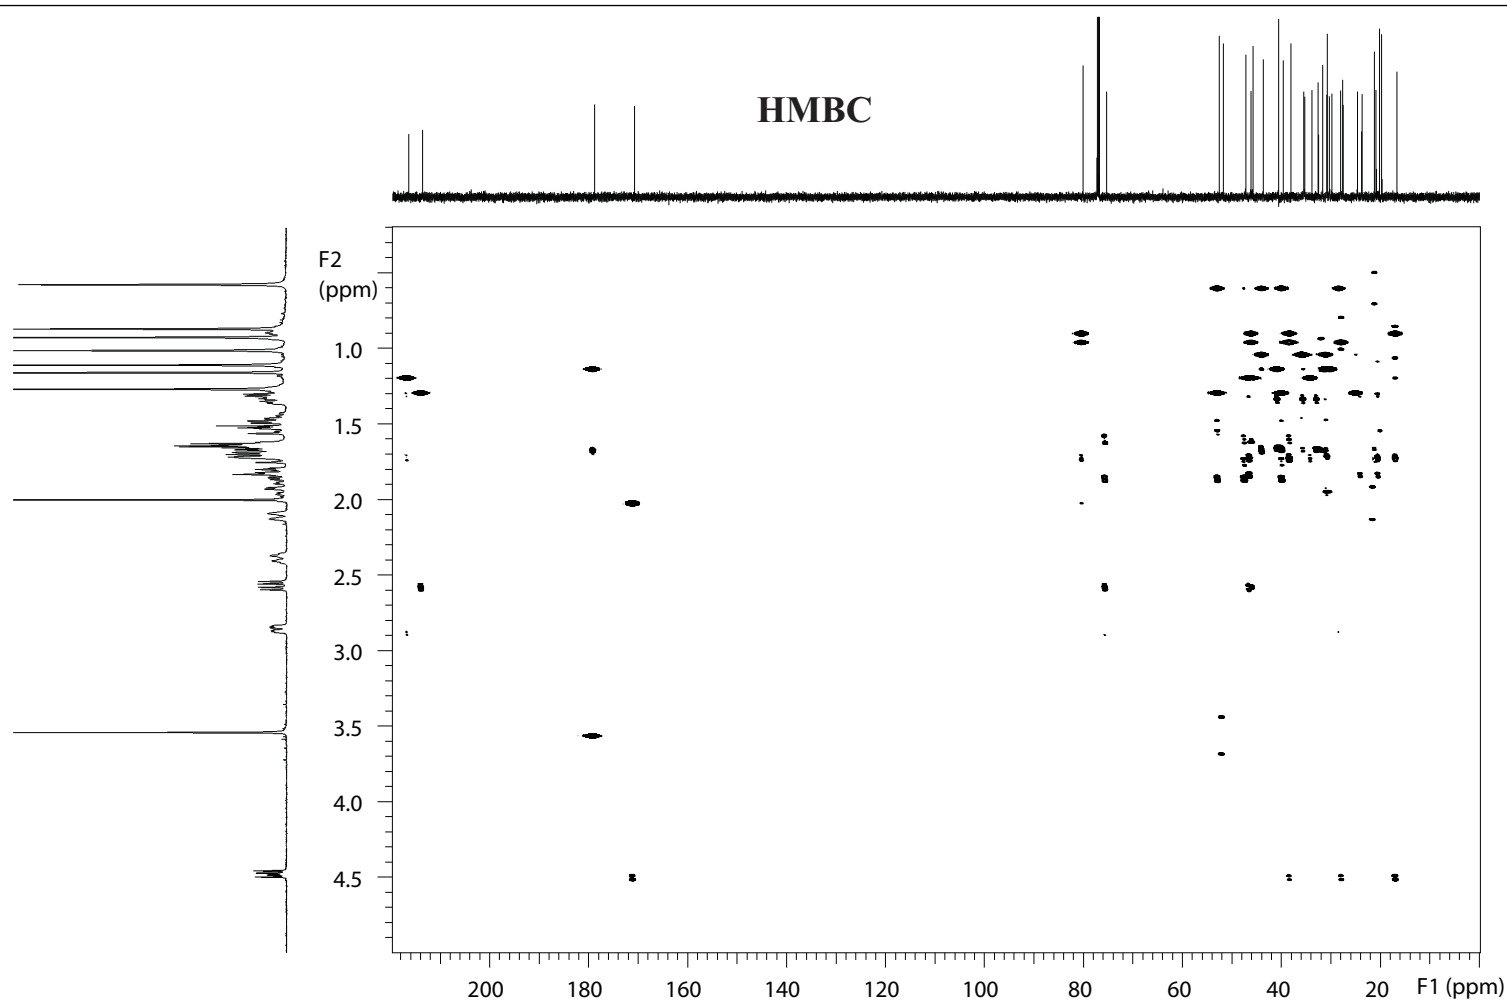

Figure S39. COSY and NOESY spectra of 15.

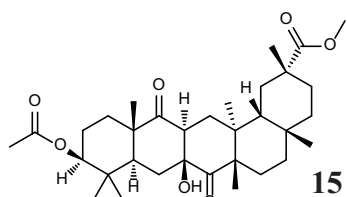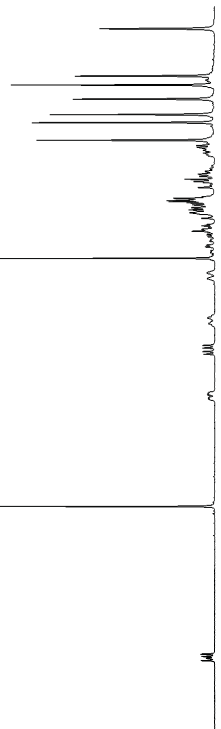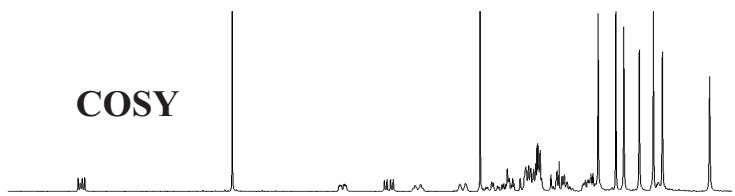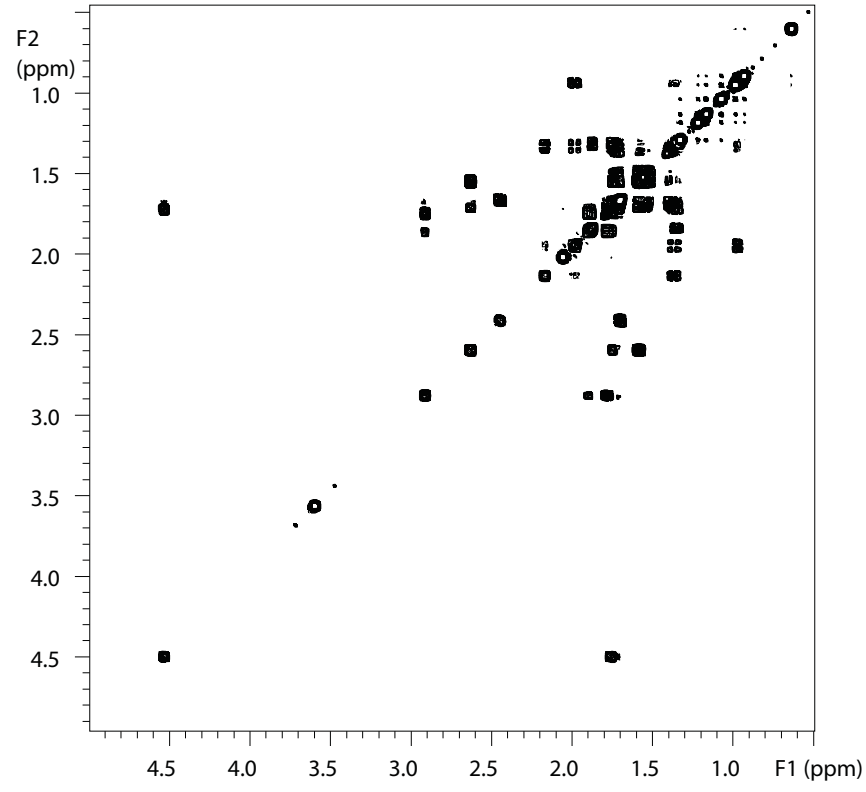

**NOESY**

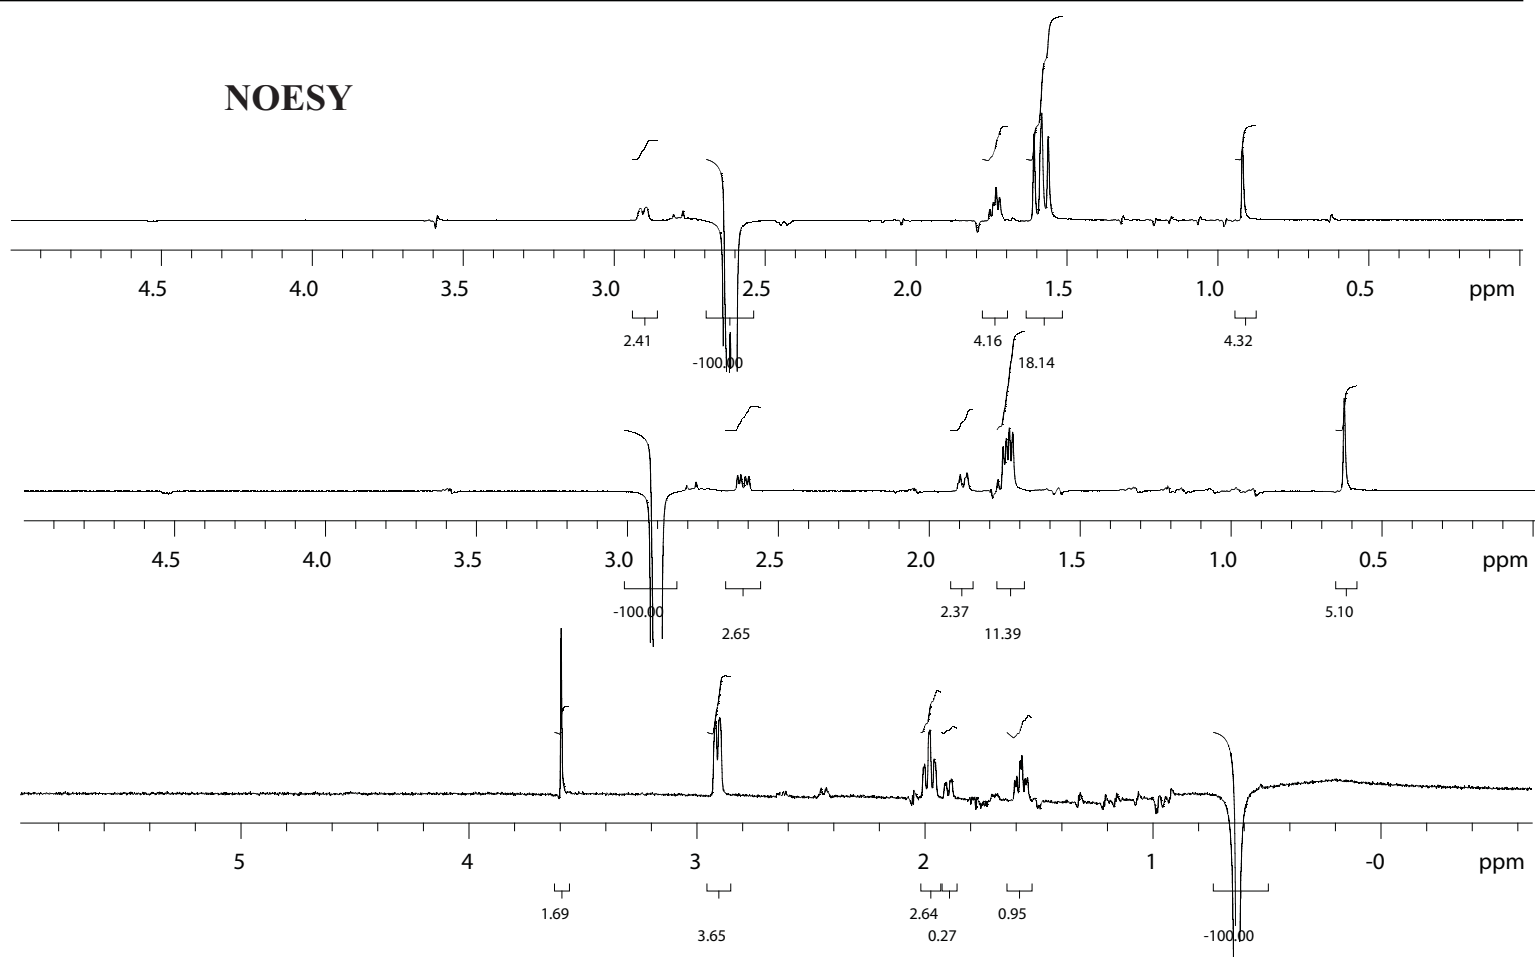

**Figure S40.**  $^1\text{H}$  and  $^{13}\text{C}$  spectra of **16**

STANDARD PROTON PARAMETERS

Pulse Sequence: s2pul  
 Solvent: CDCl<sub>3</sub>  
 Temp: 25.0 C / 298.1 K  
 File: 1H  
 INOVA-500 "joe"

Pulse 75.7 degrees  
 Acq. time 3.500 sec  
 Width 8000.0 Hz  
 8 repetitions  
 OBSERVE H1, 599.9067222 MHz  
 DATA PROCESSING  
 FT size 65536  
 Total time 0 min, 28 sec

$^1\text{H}$

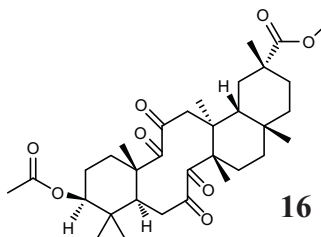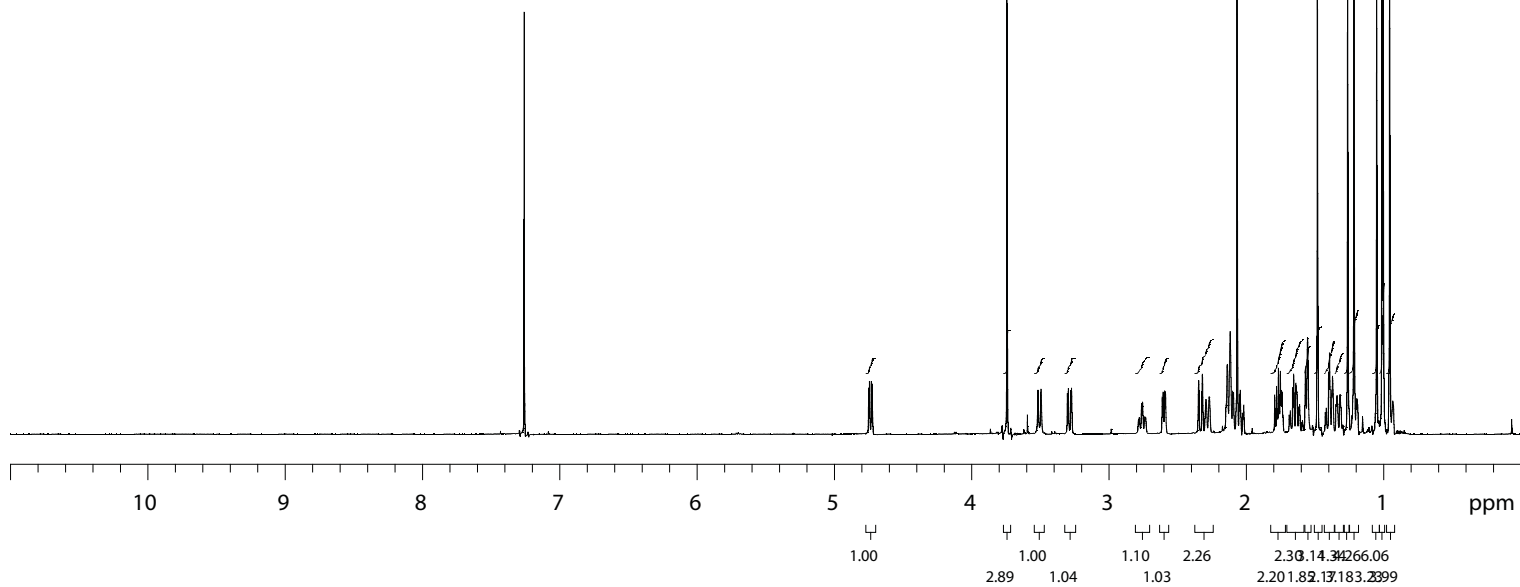

Sample6

Pulse Sequence: s2pul  
 Solvent: CDCl<sub>3</sub>  
 Temp: 25.0 C / 298.1 K  
 User: 1-14-87  
 File: 13C  
 INOVA-500 "joe"

Pulse 58.7 degrees  
 Acq. time 1.300 sec  
 Width 40000.0 Hz  
 4096 repetitions  
 OBSERVE C13, 150.8466417 MHz  
 DECOUPLE H1, 599.9097318 MHz  
 Power 42 dB  
 continuously on  
 WALTZ-16 modulated  
 DATA PROCESSING  
 Line broadening 1.0 Hz

$^{13}\text{C}$

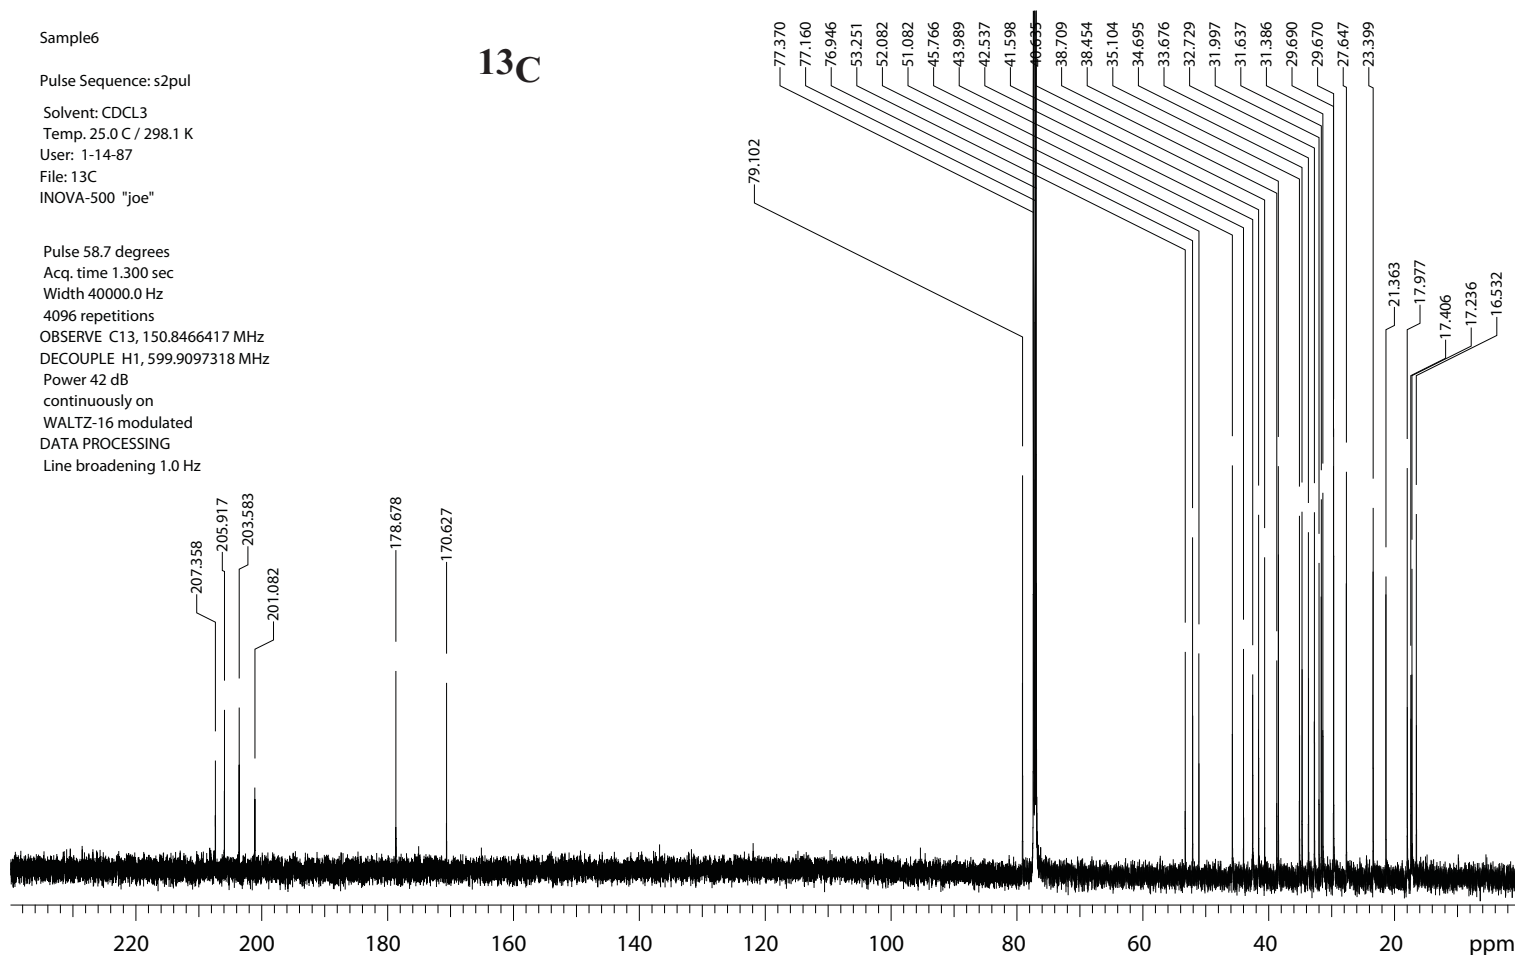

Figure S41. <sup>1</sup>H and <sup>13</sup>C spectra of 17

STANDARD PROTON PARAMETERS

Pulse Sequence: s2pul  
Solvent: CDCl<sub>3</sub>  
Temp. 25.0 C / 298.1 K  
File: 1H  
INOVA-500 "joe"

Pulse 75.7 degrees  
Acq. time 3.500 sec  
Width 8000.0 Hz  
8 repetitions  
OBSERVE H1, 599.9067214 MHz  
DATA PROCESSING  
FT size 65536  
Total time 0 min, 28 sec

<sup>1</sup>H

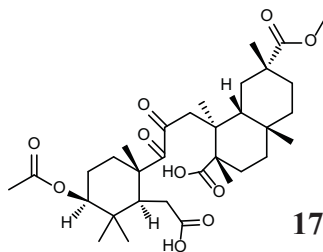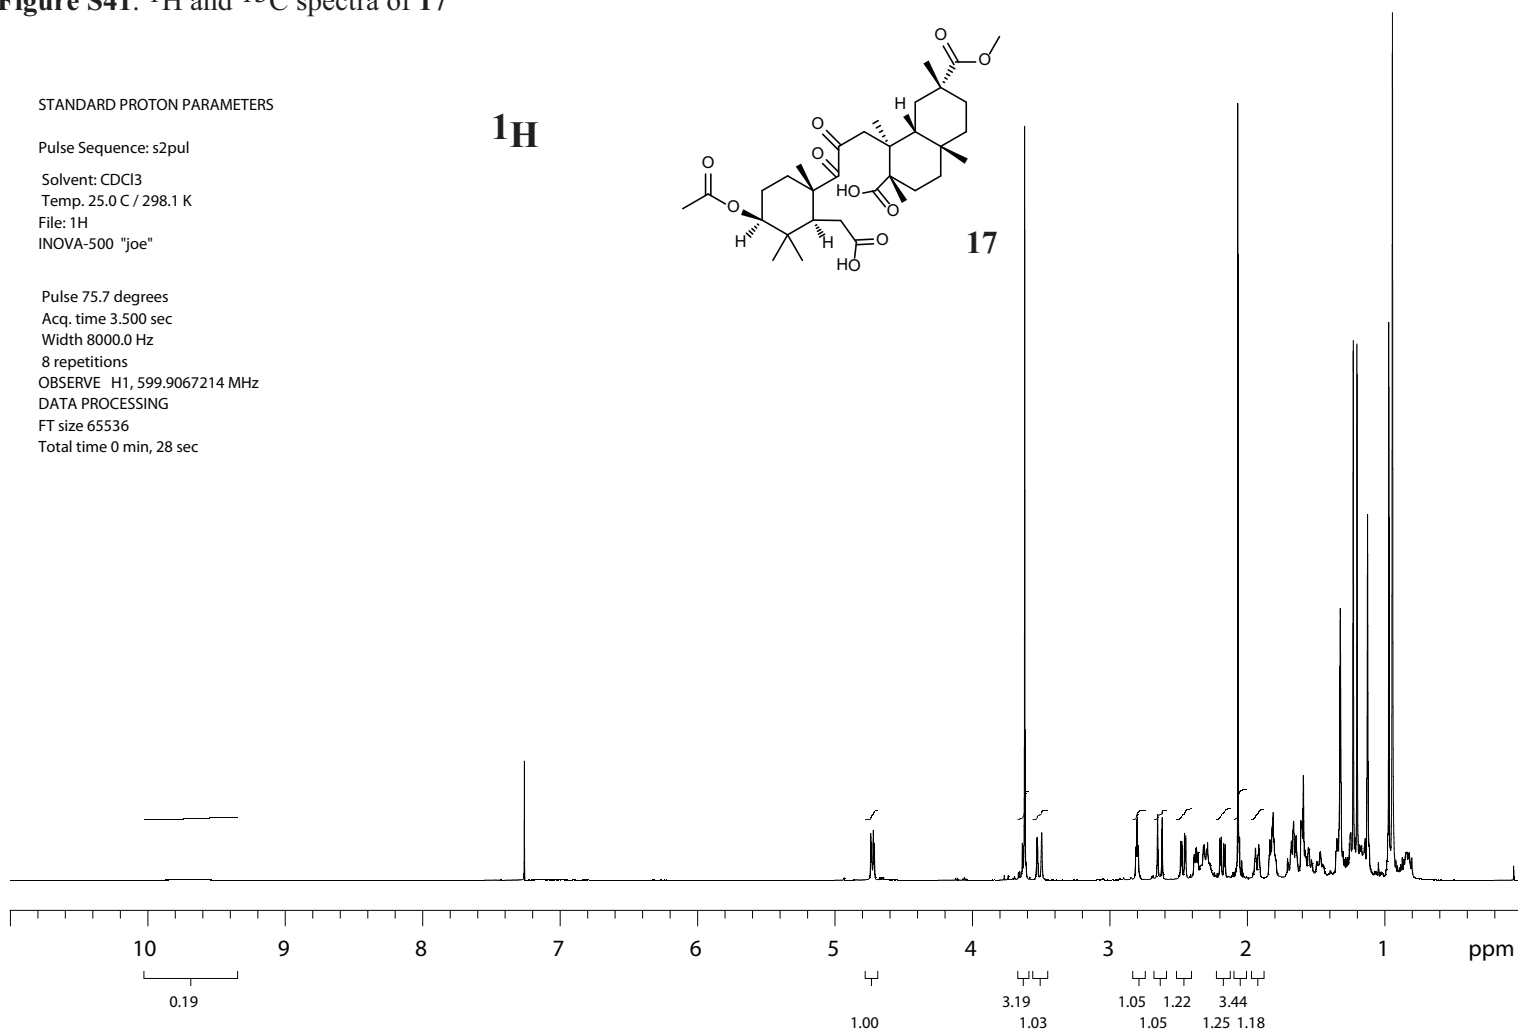

Sample6

Pulse Sequence: s2pul  
Solvent: CDCl<sub>3</sub>  
Temp. 25.0 C / 298.1 K  
User: 1-14-87  
File: 13C  
INOVA-500 "joe"

Pulse 58.7 degrees  
Acq. time 1.300 sec  
Width 40000.0 Hz  
4096 repetitions  
OBSERVE C13, 150.8466429 MHz  
DECOUPLE H1, 599.9097318 MHz  
Power 42 dB  
continuously on  
WALTZ-16 modulated  
DATA PROCESSING  
Line broadening 1.0 Hz

<sup>13</sup>C

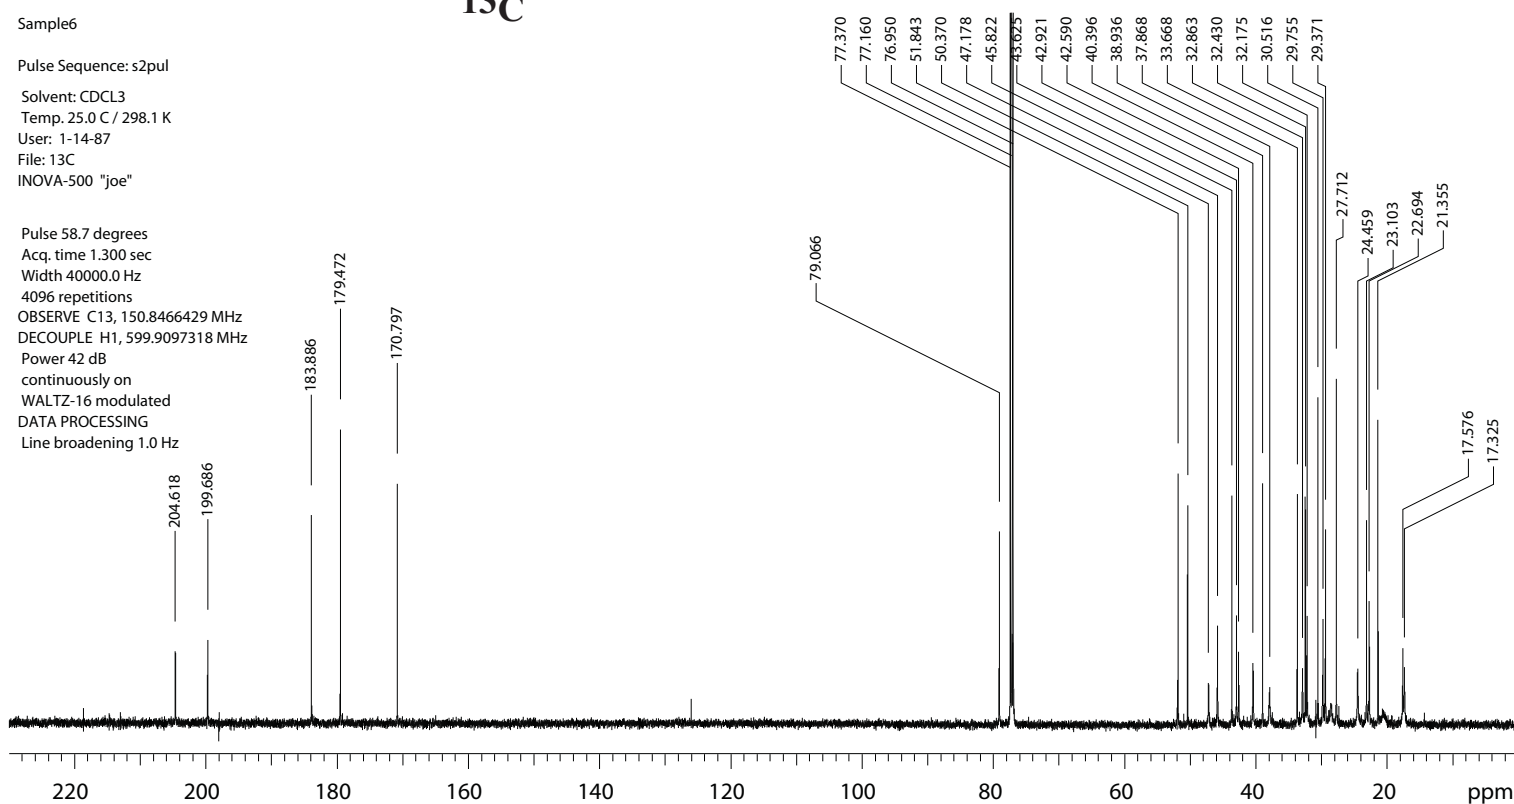



Figure S42. HMQC and HMBC spectra of 17.

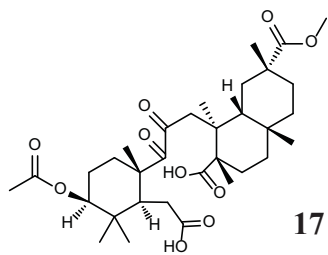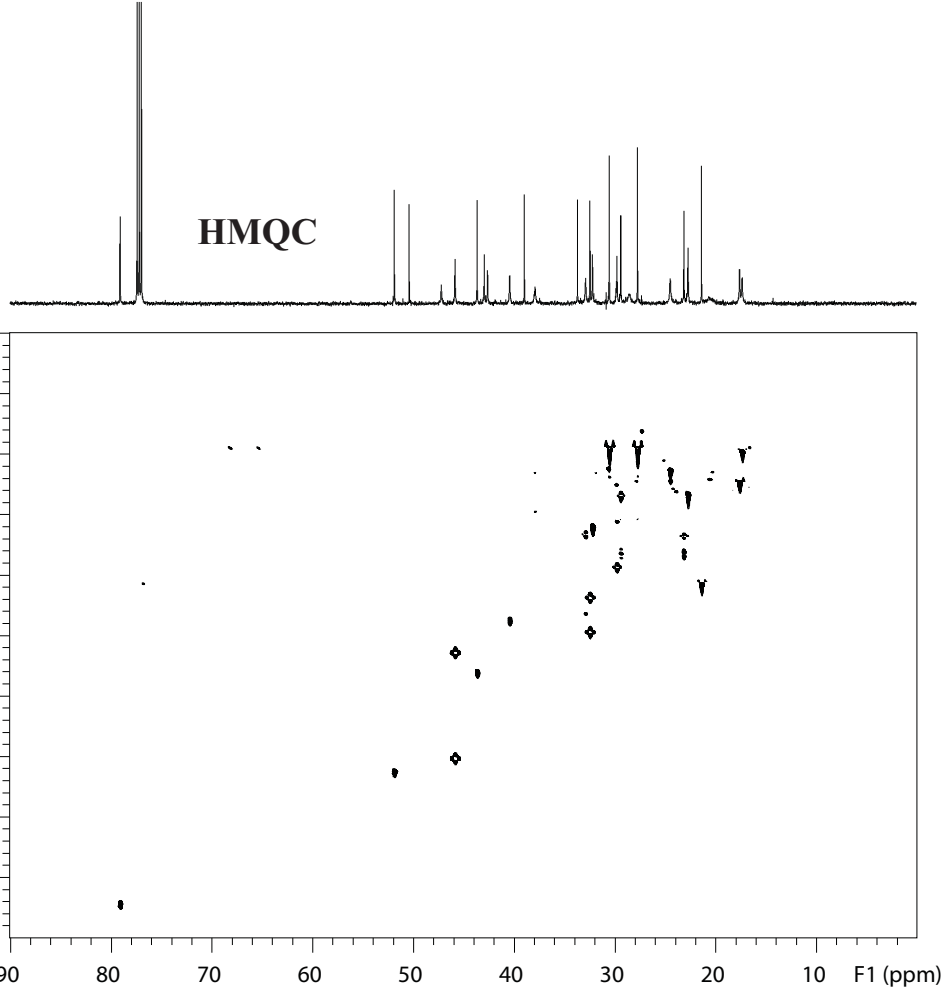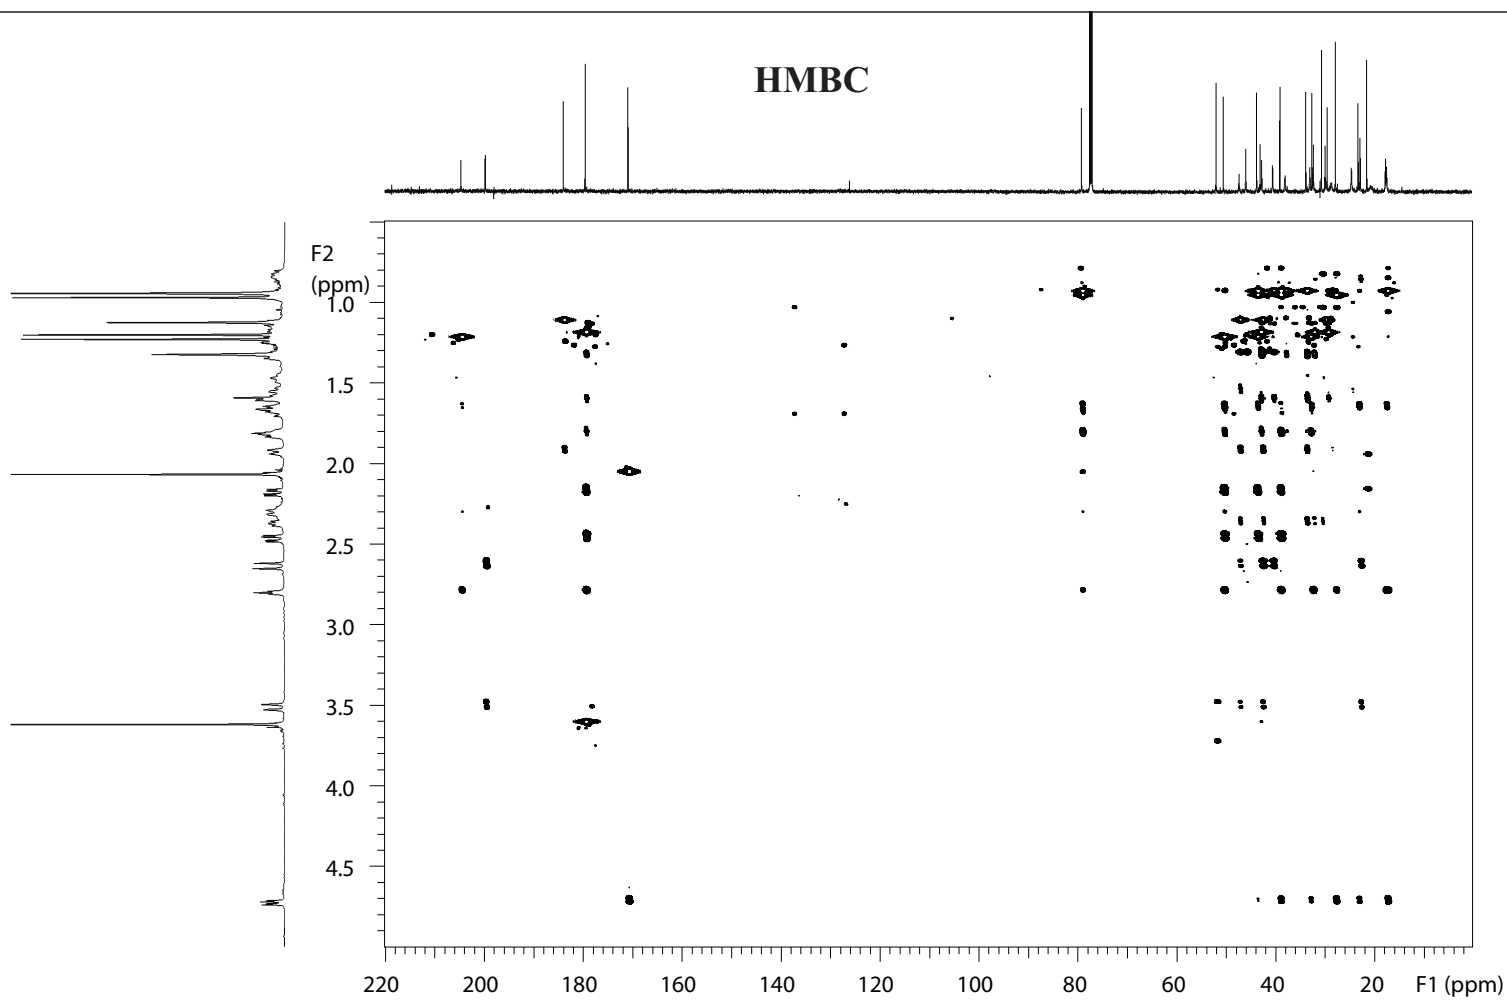

Figure S43. <sup>1</sup>H and <sup>13</sup>C spectra of 18

vai2\_15Jul2011  
Data saved in:  
chem400/export/home/vai2/vnmrsys/data  
Archive directory: /export/home/vai2/vnmrsys/data  
Sample directory: vai2\_15Jul2011

Pulse Sequence: s2pul  
Solvent: CDCl<sub>3</sub>  
Ambient temperature  
File: 1H  
INOVA-500 "Joe"

Relax. delay 1.000 sec  
Pulse 45.0 degrees  
Acq. time 3.744 sec  
Width 6395.9 Hz  
8 repetitions  
OBSERVE H1, 399.7434712 MHz  
DATA PROCESSING  
FT size 65536  
Total time 0 min, 38 sec

<sup>1</sup>H

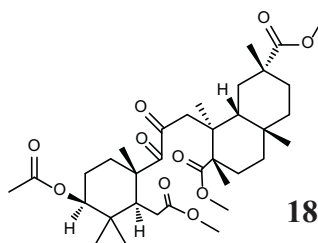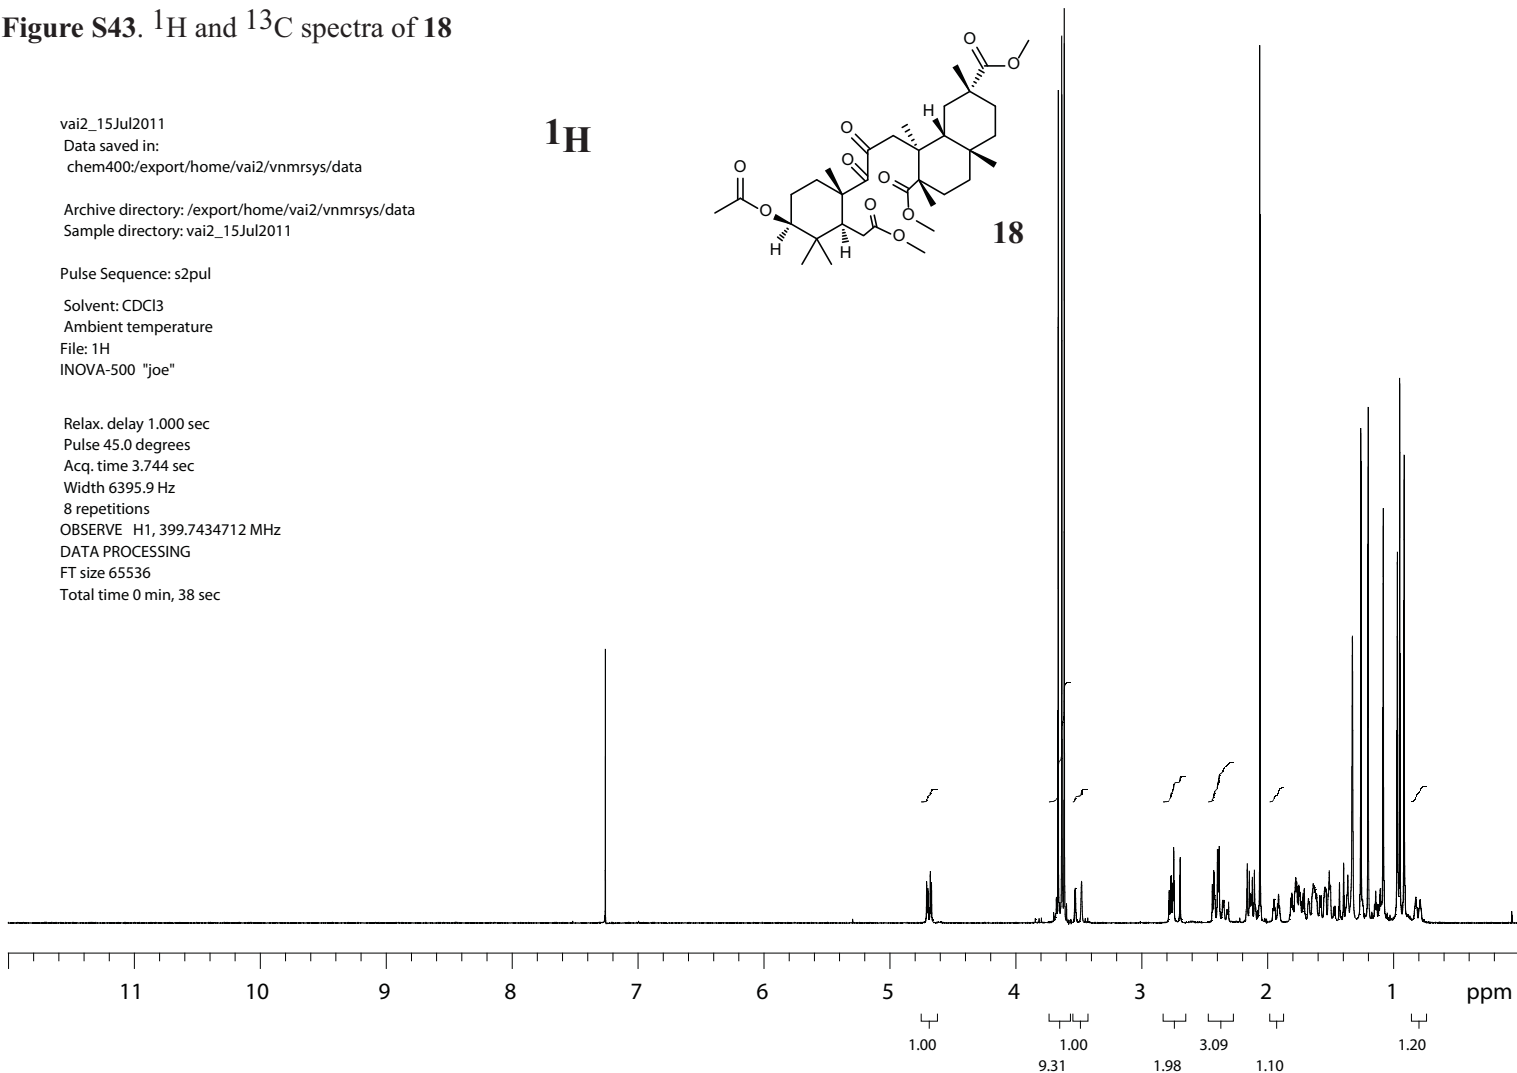

Sample6  
Pulse Sequence: s2pul  
Solvent: CDCl<sub>3</sub>  
Temp. 25.0 C / 298.1 K  
User: 1-14-87  
INOVA-600 "chem600"

Pulse 58.7 degrees  
Acq. time 1.300 sec  
Width 40000.0 Hz  
4096 repetitions  
OBSERVE C13, 150.8466425 MHz  
DECOUPLE H1, 599.9097318 MHz  
Power 42 dB  
continuously on  
WALTZ-16 modulated  
DATA PROCESSING  
Line broadening 1.0 Hz  
FT size 131072  
Total time 1 hr, 29 min, 23 sec

<sup>13</sup>C

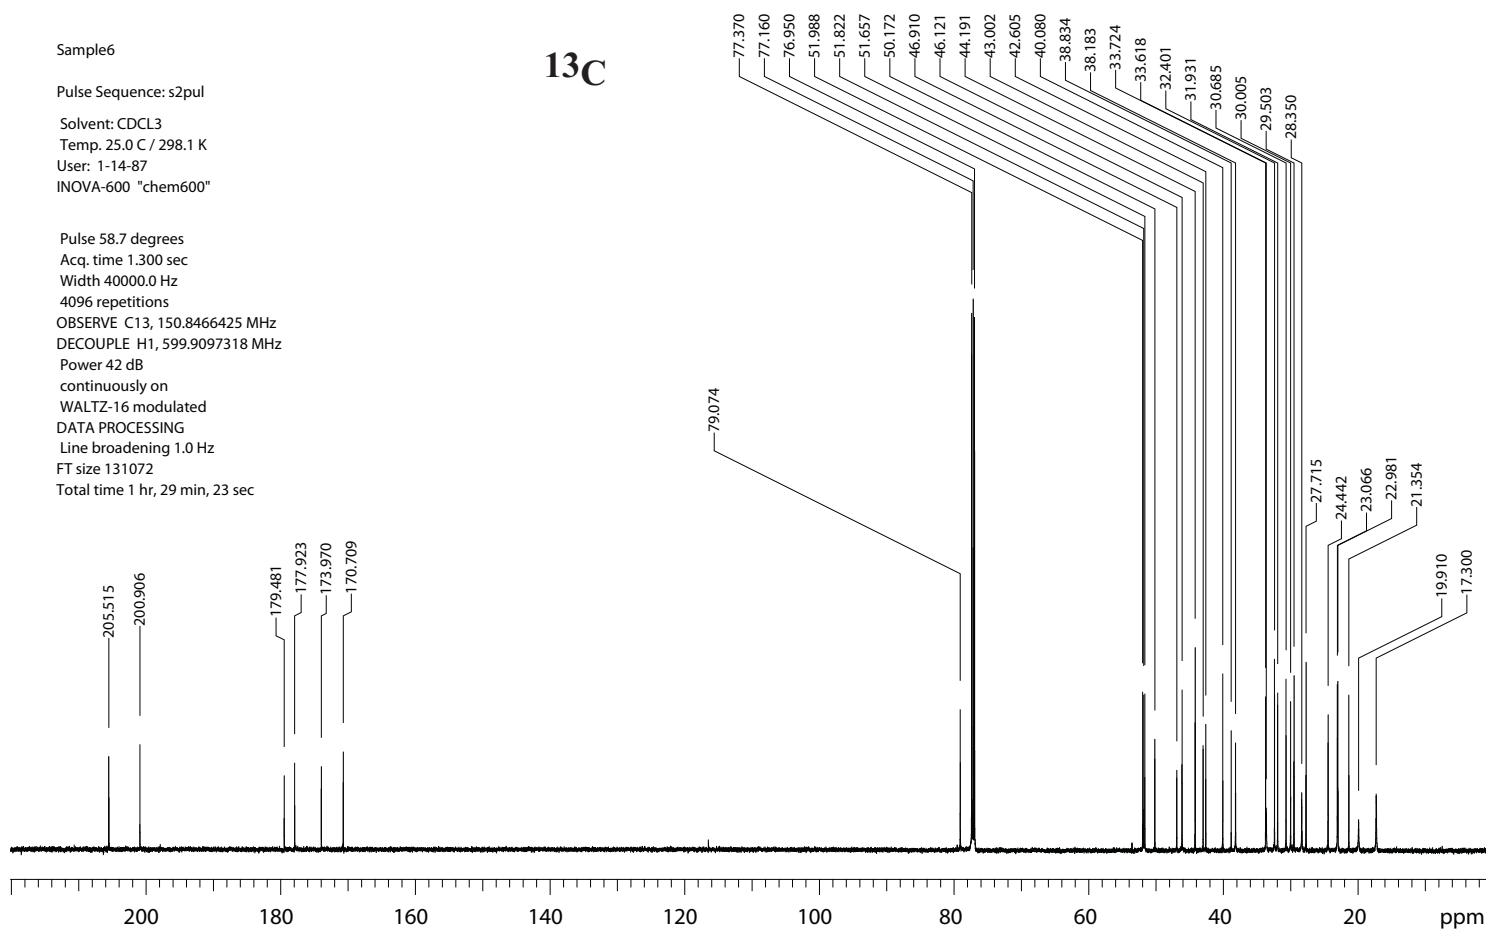

# Figure S44. $^1\text{H}$ and $^{13}\text{C}$ spectra of 19

Jan28\_2011

Archive directory: /export/home/greg/vnmrsys/data  
Sample directory: Sample2\_25Jan2011  
File: H11D

Pulse Sequence: s2pul

Solvent: CDCl<sub>3</sub>  
Temp. 25.0 C / 298.1 K  
File: H11D  
INOVA-500 "joe"

Relax. delay 1.000 sec  
Pulse 45.0 degrees  
Acq. time 3.500 sec  
Width 5718.8 Hz  
8 repetitions  
OBSERVE H1, 599.9067218 MHz  
DATA PROCESSING  
FT size 65536  
Total time 0 min, 36 sec

## $^1\text{H}$

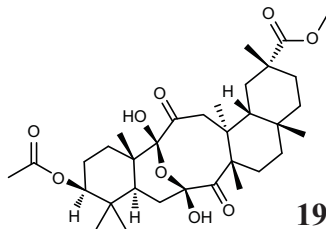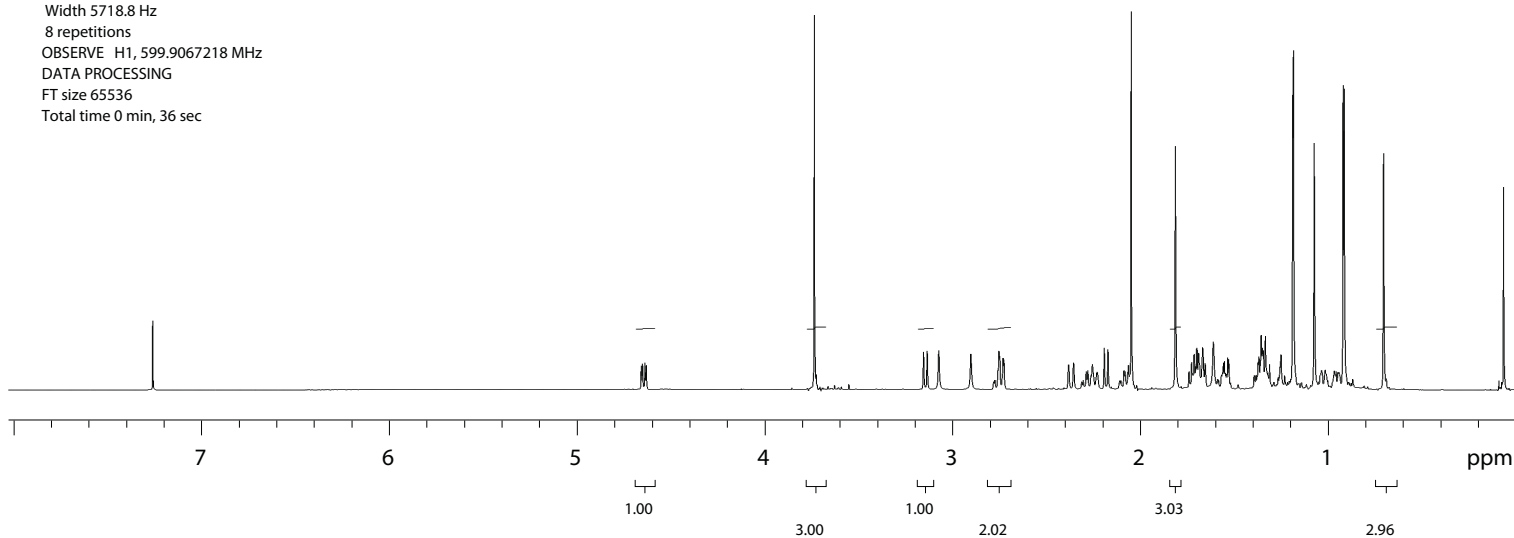

Sample 4

Pulse Sequence: s2pul

Solvent: CDCl<sub>3</sub>  
Temp. 25.0 C / 298.1 K  
User: 1-14-87  
File: C13  
INOVA-500 "joe"

Pulse 58.7 degrees  
Acq. time 1.300 sec  
Width 40000.0 Hz  
1044 repetitions  
OBSERVE C13, 150.8466417 MHz  
DECOUPLE H1, 599.9097318 MHz  
Power 42 dB  
continuously on  
WALTZ-16 modulated  
DATA PROCESSING  
Line broadening 1.0 Hz  
FT size 131072  
Total time 1 hr, 29 min, 10 sec

## $^{13}\text{C}$

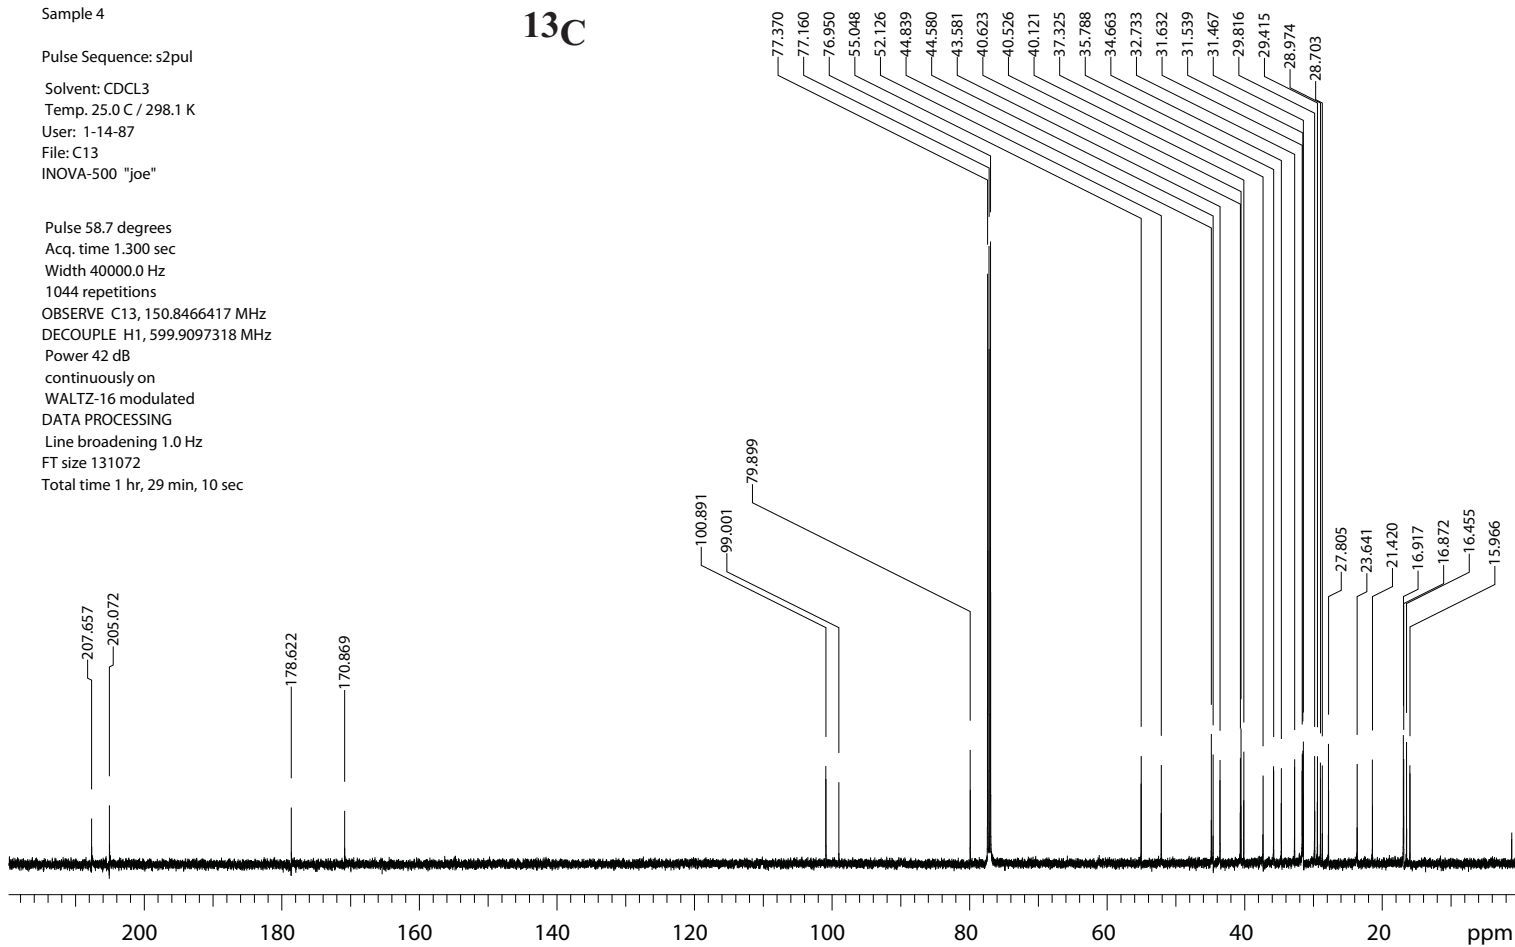

Figure S45. HMQC and HMBC spectra of 19.

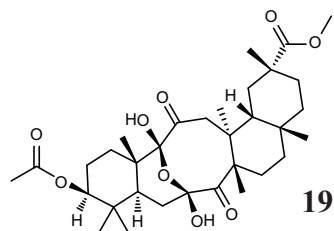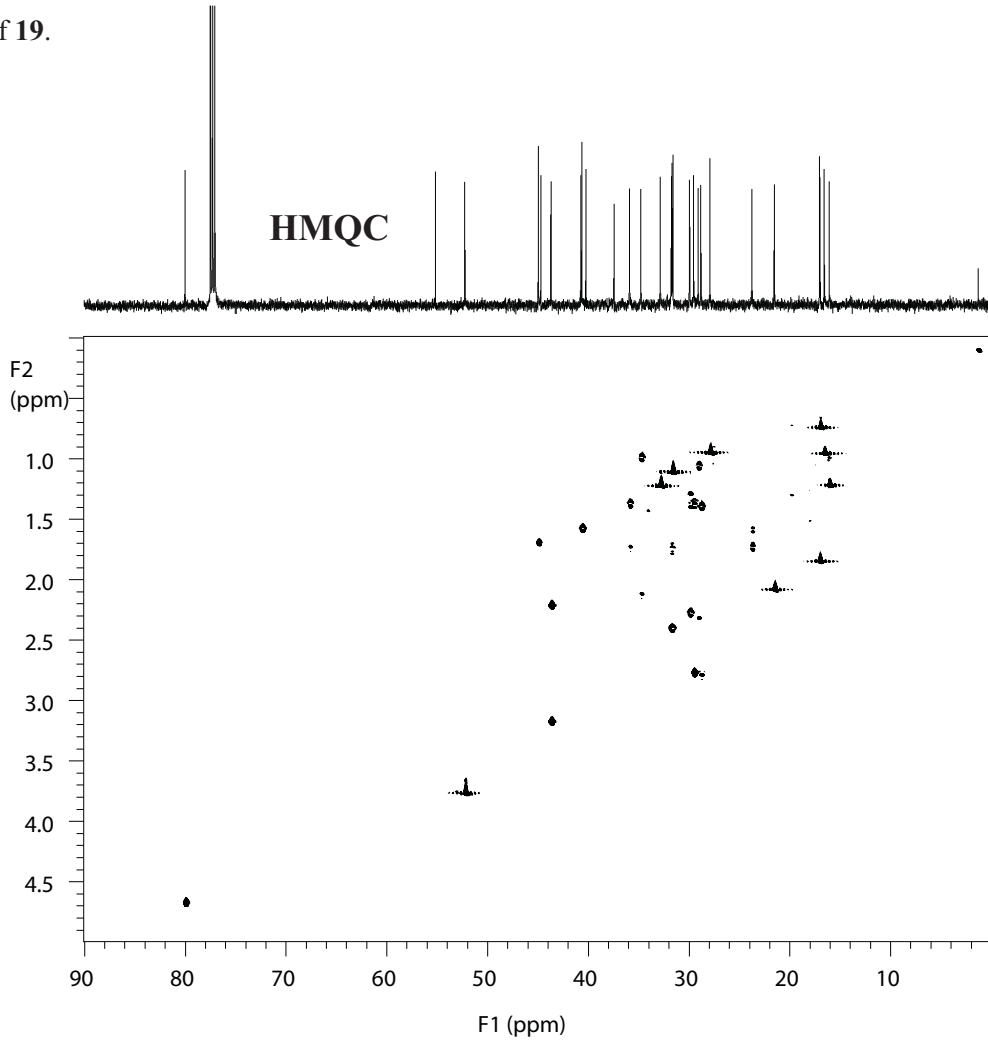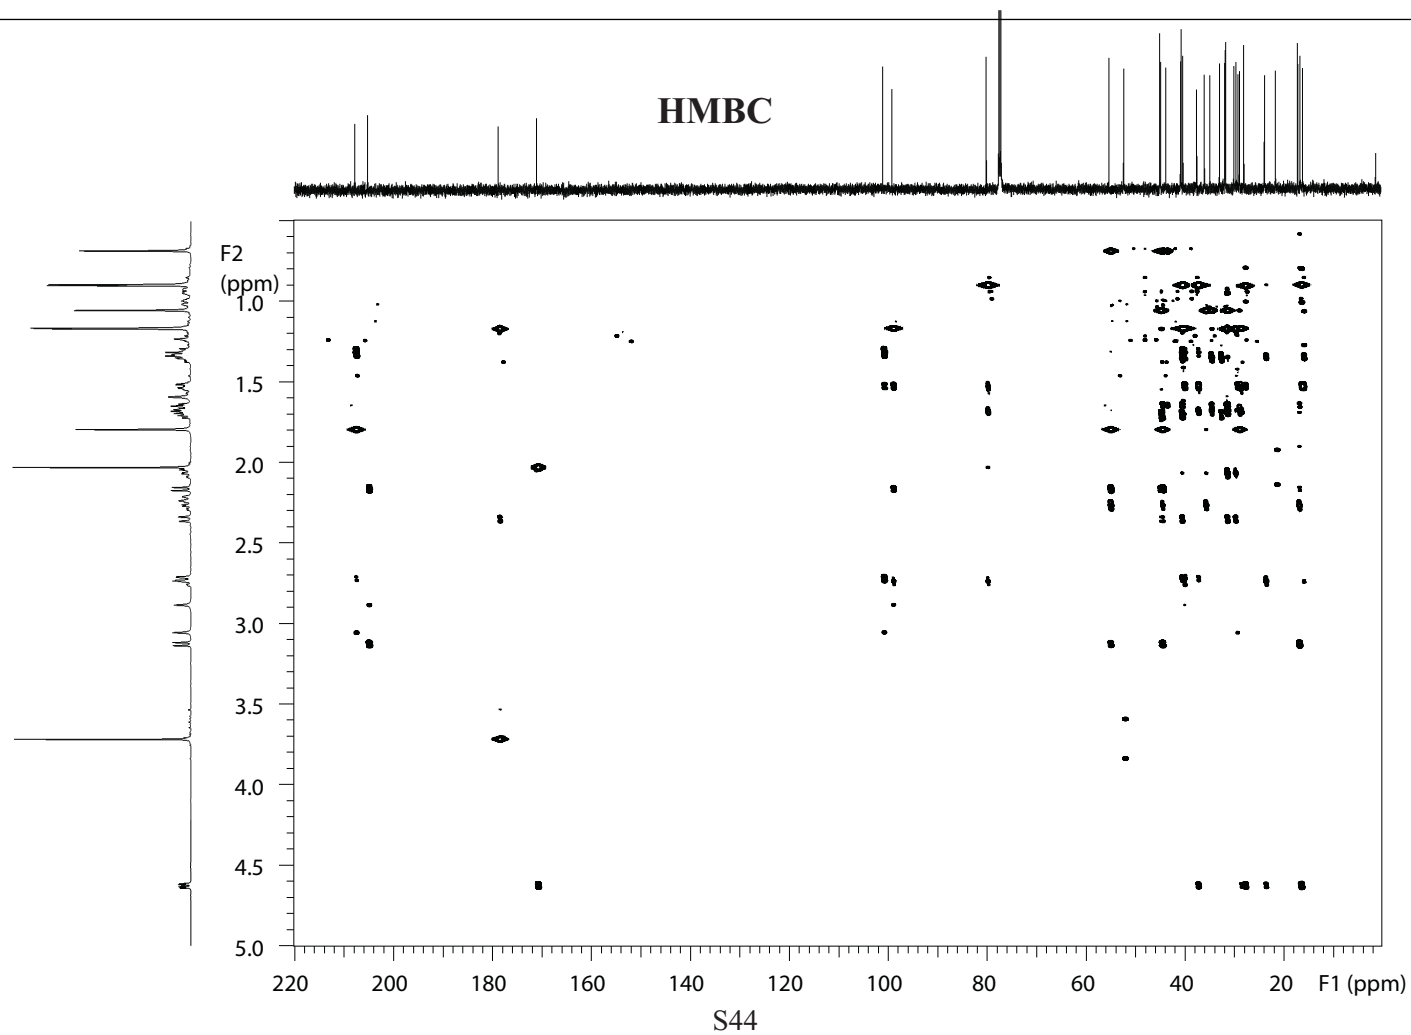

Figure S46. COSY and NOESY spectra of 19.

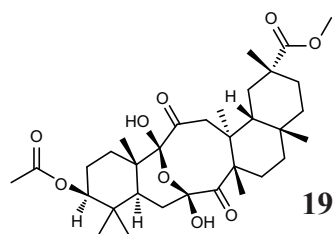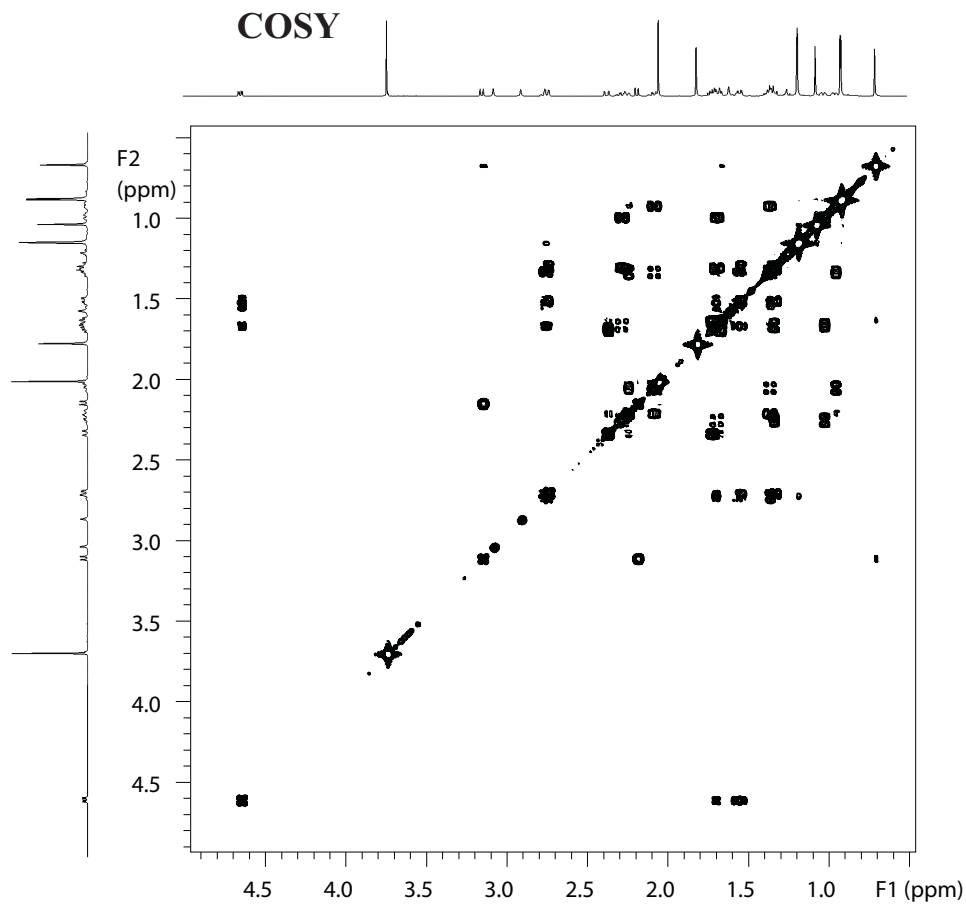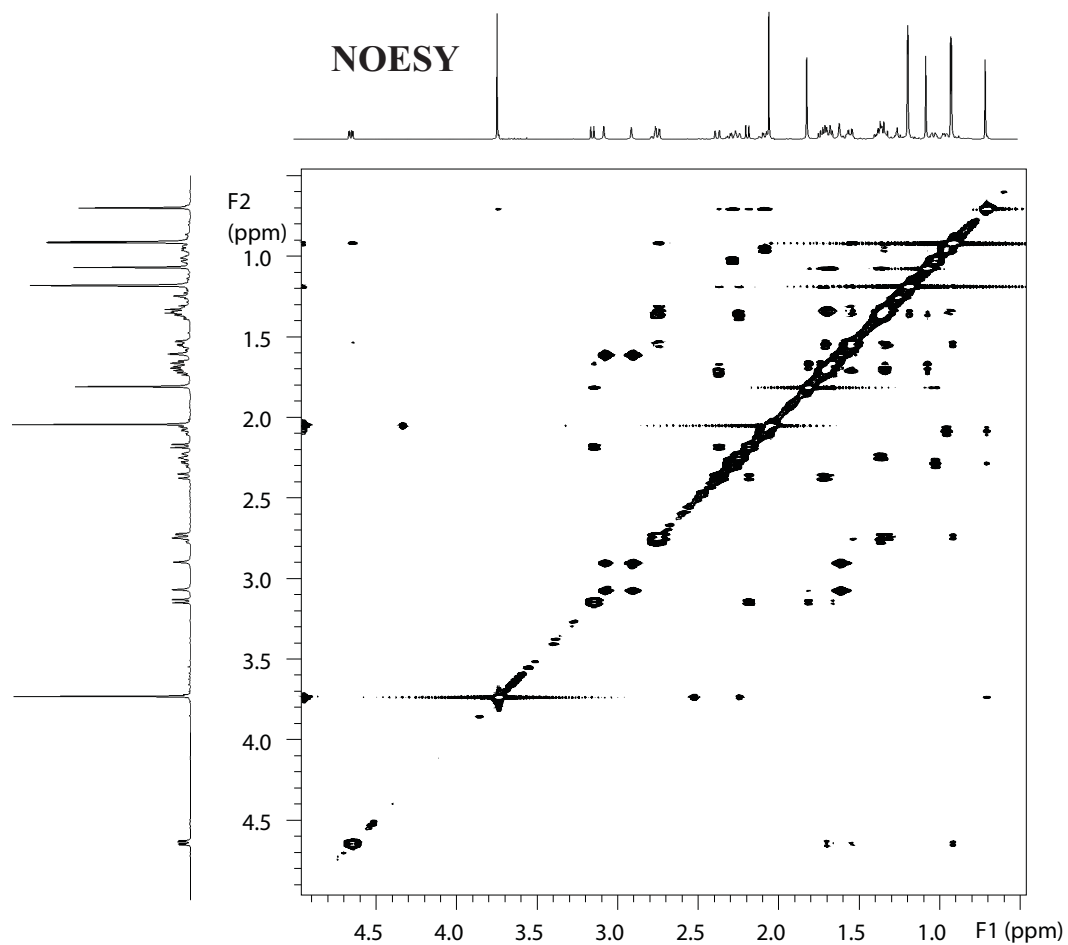

**Figure S47.**  $^1\text{H}$  and  $^{13}\text{C}$  spectra of **20**

STANDARD PROTON PARAMETERS

Pulse Sequence: s2pul

Solvent:  $\text{CDCl}_3$   
Temp. 25.0 C / 298.1 K

File: H1  
INOVA-500 "joe"

Pulse 75.7 degrees  
Acq. time 3.500 sec  
Width 8000.0 Hz  
16 repetitions  
OBSERVE H1, 599.9067239 MHz  
DATA PROCESSING  
FT size 65536  
Total time 0 min, 56 sec

$^1\text{H}$

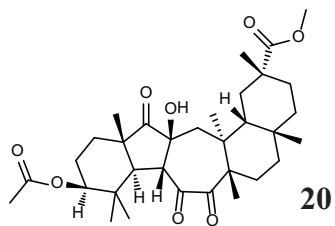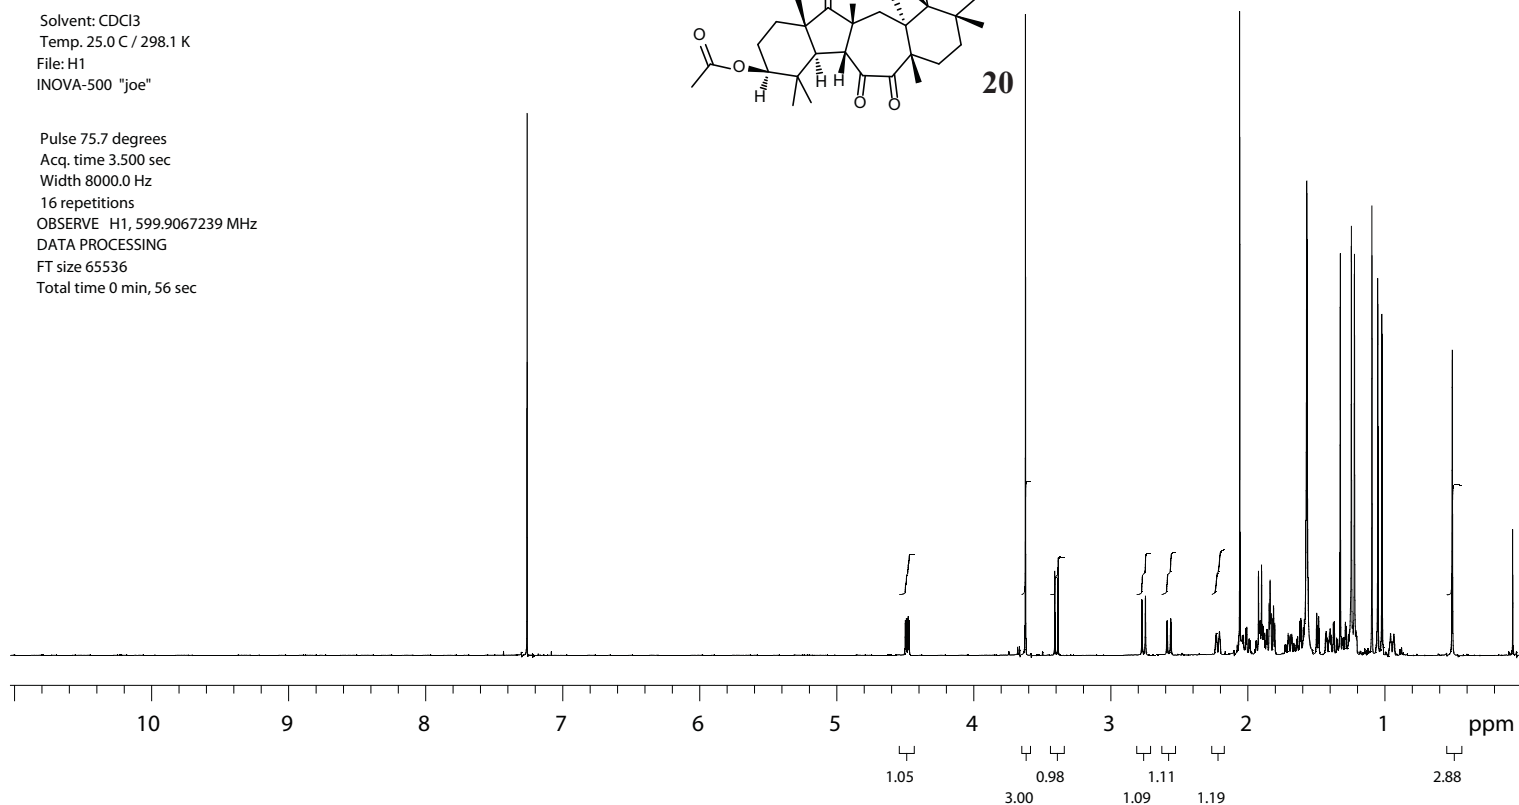

$^{13}\text{C}$

Sample6

Pulse Sequence: s2pul

Solvent:  $\text{CDCl}_3$   
Temp. 25.0 C / 298.1 K  
User: 1-14-87  
INOVA-600 "chem600"

Pulse 58.7 degrees  
Acq. time 1.300 sec  
Width 40000.0 Hz  
4096 repetitions  
OBSERVE C13, 150.8466407 MHz  
DECOUPLE H1, 599.9097318 MHz  
Power 42 dB  
continuously on  
WALTZ-16 modulated  
DATA PROCESSING  
Line broadening 1.0 Hz  
FT size 131072  
Total time 1 hr, 29 min, 23 sec

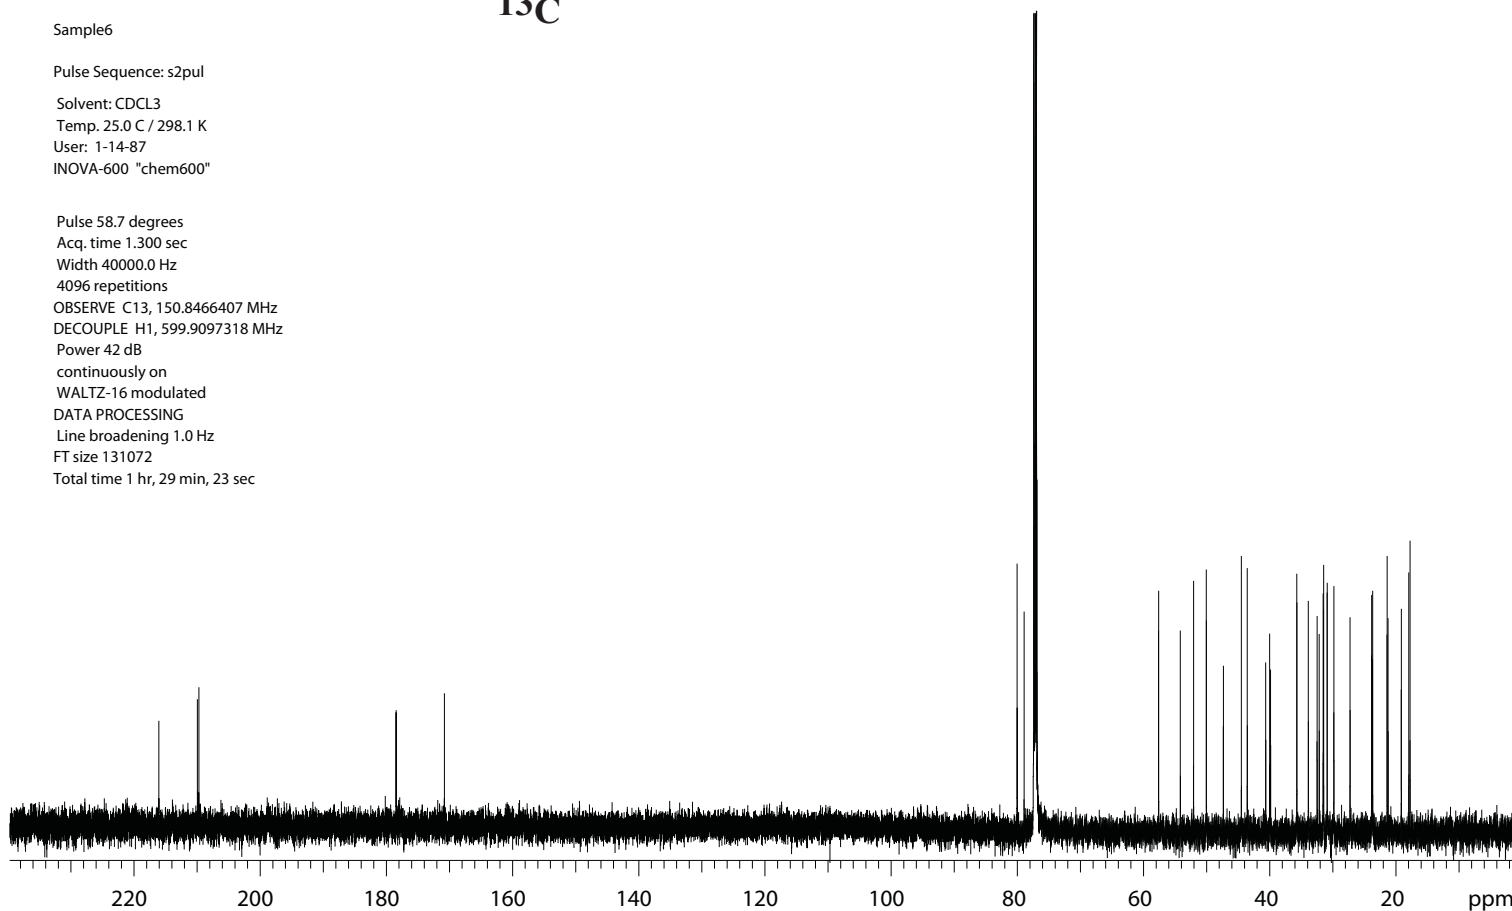

Figure S48. HMQC and HMBC spectra of **20**.

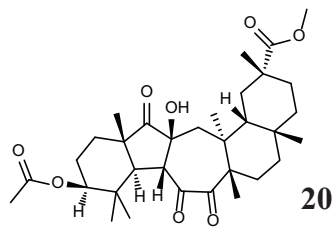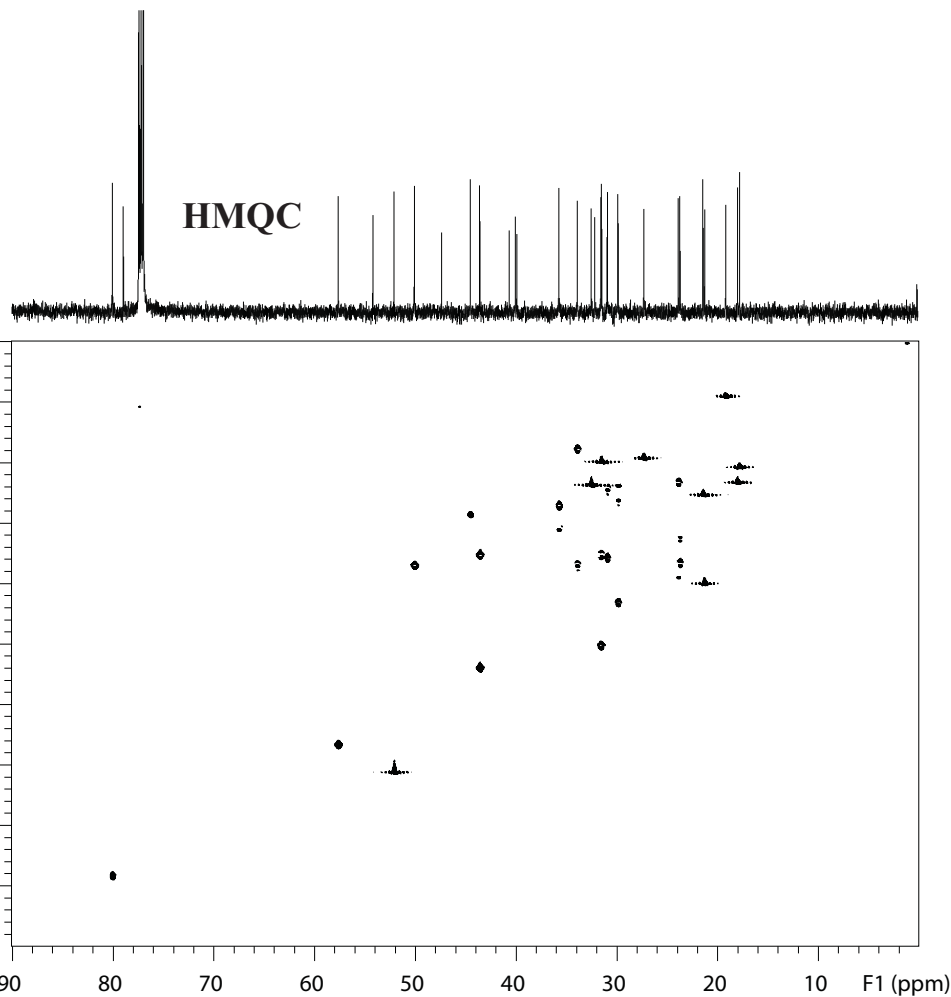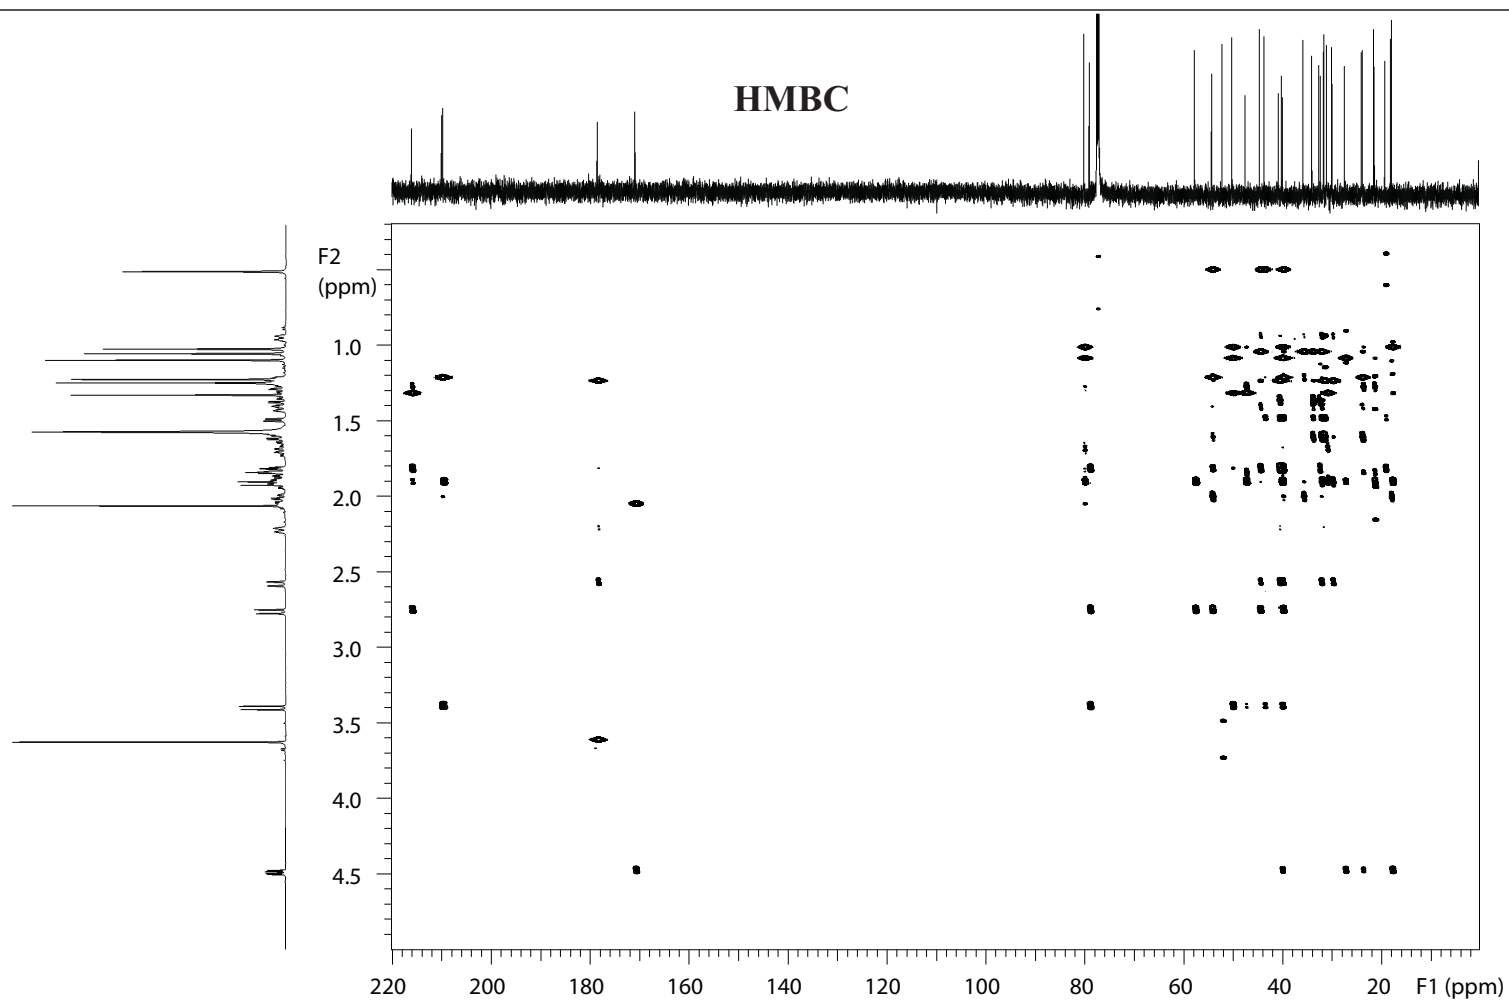

Figure S49. COSY and NOESY spectra of **20**.

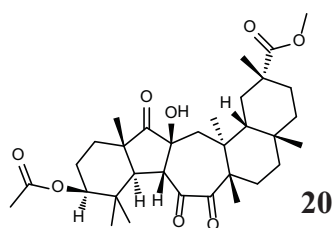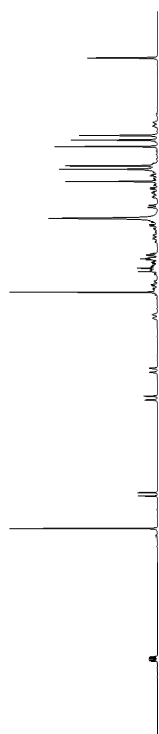

COSY

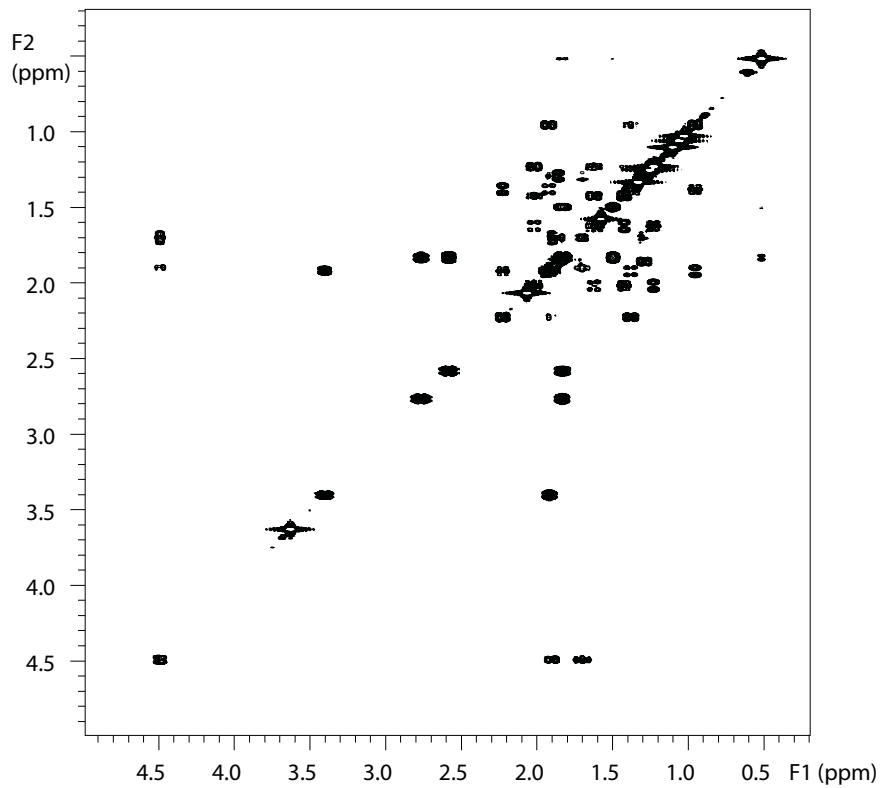

NOESY

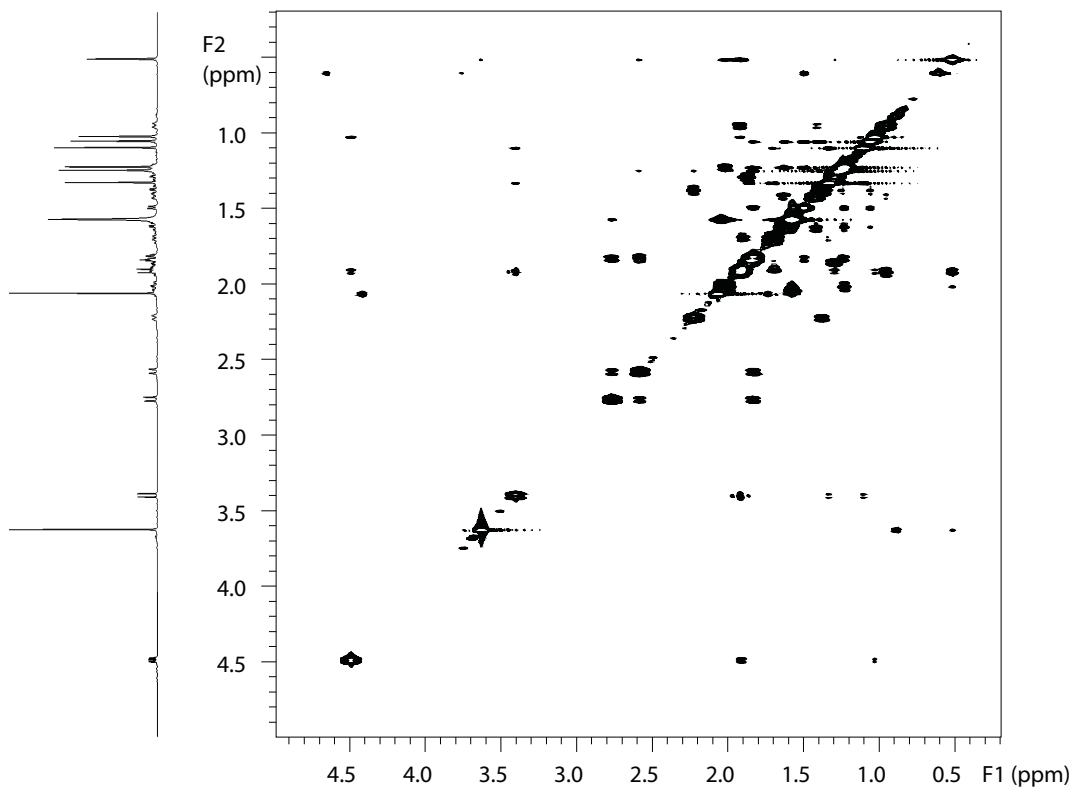

Supplement: NIHMS434702-supplement-1_si_001.pdf [file NIHMS434702-supplement-1_si_001.pdf]
